# Supplementary material for: Repeated centralized multidisciplinary team assessment of resectability, clinical behavior, and outcomes in 1086 Finnish metastatic colorectal cancer patients (RAXO): A nationwide prospective intervention study
Source: PubMed Central journal article supplement — Lancet Reg Health Eur. 2021 Jan 29;3:100049. doi: 10.1016/j.lanepe.2021.100049 (PMC8454802; doi:10.1016/j.lanepe.2021.100049), 2021-01-29
Supplement: mmc1.pdf [file mmc1.pdf]

## TABLE OF CONTENTS

|                                                                                                                                                        |    |
|--------------------------------------------------------------------------------------------------------------------------------------------------------|----|
| INTRODUCTION AND DISCUSSION – Minireview of literature .....                                                                                           | 2  |
| METHODS – Study design and participants: Study centres.....                                                                                            | 5  |
| METHODS – Study design and participants: Power calculation.....                                                                                        | 6  |
| METHODS – Study design and participants: Protocol violation.....                                                                                       | 7  |
| METHODS – Intervention: Online information from local hospital.....                                                                                    | 8  |
| METHODS – Intervention: Online information in second opinion.....                                                                                      | 9  |
| METHODS – Intervention: Radiology and Systemic treatment.....                                                                                          | 10 |
| METHODS – Intervention and Outcomes: Resectability, radicality and classification criteria, and guarantee-time bias .....                              | 11 |
| METHODS AND RESULTS – Demographics and adjusted multivariable analysis for procedures or not .....                                                     | 12 |
| RESULTS – Detailed demographics for R0/1-resection, R2/LAT, “systemic therapy only” and best supportive care .....                                     | 13 |
| RESULTS – Forrest plot of subgroup analyses for overall survival in procedures versus not .....                                                        | 14 |
| METHODS AND RESULTS – Demographics and adjusted multivariable analysis for R0/1-resection, R2/LAT, systemic therapy only and best supportive care..... | 15 |
| METHODS AND RESULTS – Population-based liver resection rate estimates .....                                                                            | 16 |
| METHODS AND RESULTS – Population-based results .....                                                                                                   | 17 |
| RESULTS – Surgery and systemic therapy for all and single metastatic sites .....                                                                       | 18 |
| RESULTS – Surgery and systemic therapy for multiple metastatic sites .....                                                                             | 19 |
| RESULTS – Safety of resection and/or LAT .....                                                                                                         | 20 |
| RESULTS – Safety of first-line systemic therapy .....                                                                                                  | 21 |
| REFERENCES .....                                                                                                                                       | 22 |
| STUDY PROTOCOL.....                                                                                                                                    | 23 |

|                                                                                                                                                                                                                                                                                                                      |    |
|----------------------------------------------------------------------------------------------------------------------------------------------------------------------------------------------------------------------------------------------------------------------------------------------------------------------|----|
| Appendix Table 1. Systemic mini-review of literature for resectability, resection and conversion rates, and outcomes of resections for liver metastases in selected and unselected populations. ....                                                                                                                 | 2  |
| Appendix Table 2. Systemic mini-review of literature for resectability, resection and conversion rates, and outcomes of resections for lung, lymph node, peritoneal and local recurrence in selected and unselected populations. ....                                                                                | 3  |
| Appendix Table 3. Systemic mini-review of literature for resectability, resection and conversion rates, and outcomes of resections for multisite metastases in randomized studies.....                                                                                                                               | 4  |
| Appendix Table 4. Presentation of 21 participating hospitals with recruitment per centre, and multidisciplinary team (MDT) assessment principles at local hospitals and centralization principles for organ-specific MDTs in panel A. Investigators from 21 participating hospital in panel B.....                   | 5  |
| Appendix Table 5. Number of centres with protocol violations. ....                                                                                                                                                                                                                                                   | 7  |
| Appendix Table 6. Essential patient characteristics by procedure i.e. resection and/or local ablative therapy (LAT) or not i.e. “systemic therapy alone” or best supportive care (BSC).....                                                                                                                          | 12 |
| Appendix Table 7. Multivariable analysis according to essential patient characteristics for OS from mCRC diagnosis for procedures versus not.....                                                                                                                                                                    | 12 |
| Appendix Table 8. Multivariable analysis according to according to grade, stage, primary location and metastatic sites for OS from mCRC diagnosis for procedures versus not. ....                                                                                                                                    | 12 |
| Appendix Table 9. Detailed baseline demographics separated for treatment groups.....                                                                                                                                                                                                                                 | 13 |
| Appendix Table 8. Multivariable analysis according to essential patient characteristics for OS from mCRC diagnosis for R0/1-resection, R2-resection and/or LAT, “Systemic therapy alone” versus Best supportive care.....                                                                                            | 15 |
| Appendix Table 10. Multivariable analysis according to grade, stage, primary location, presentation, and metastatic sites for OS from mCRC diagnosis for R0/1-resection, R2-resection and/or LAT, “Systemic therapy alone” versus Best supportive care.....                                                          | 15 |
| Appendix Table 9. RAXO baseline characteristics and outcomes in comparison with population-based data for Scandinavian, Dutch and Finnish cohorts. ....                                                                                                                                                              | 17 |
| Appendix Table 10. Metastatic sites during trajectory, systemic therapy and resections/LAT for all patients and per single-site metastases divided as liver, lung, peritoneal and other single-site... ..                                                                                                            | 18 |
| Appendix Table 11. Metastatic sites during disease trajectory, surgery, local ablative therapy, and systemic therapy by metastatic site in patients with multisite metastases at baseline according to liver & extrahepatic, lung & extrapulmonary, peritoneal & extraperitoneal and other multisite metastases..... | 19 |
| Appendix Table 12. Morbidity at 8 weeks and 30-day mortality from resection and/or local ablative therapy (LAT).....                                                                                                                                                                                                 | 20 |
| Appendix Table 13. Worst grade of most common (>5%) adverse event groups associated with chemotherapy, with or without biologics* .....                                                                                                                                                                              | 21 |

|                                                                                                                                                                                                                                                                                                           |    |
|-----------------------------------------------------------------------------------------------------------------------------------------------------------------------------------------------------------------------------------------------------------------------------------------------------------|----|
| Appendix Figure 1. Patient and tumour characteristics from local hospital provided online via www.raxo.fi for central assessment of resectability.....                                                                                                                                                    | 8  |
| Appendix Figure 2. Repeated second opinion on resectability based on radiology in multidisciplinary team (MDT) assessment at Helsinki tertiary centre provided online via www.raxo.fi to all 21 university and regional hospitals. Treatment decisions were local. ....                                   | 9  |
| Appendix Figure 3. Forest plot of subgroup analyses of overall survival. Data shown for patients resected and/or ablated or receiving systemic therapy alone (best supportive care patients excluded).....                                                                                                | 14 |
| Appendix Figure 4. Population-based liver resection rates nationwide in Finland and separately for the five university hospital districts during the RAXO inclusion period (2012-2018) and preceding seven years (2005-2011) among all estimated cases with liver metastases from colorectal cancer. .... | 16 |
| Appendix Figure 5. Overall survival from 1st liver resection in patients operated at Helsinki university hospital during RAXO era and preceding 7 years.....                                                                                                                                              | 16 |

**INTRODUCTION AND DISCUSSION – MINIREVIEW OF LITERATURE**

**Appendix Table 1. Systemic mini-review of literature for resectability, resection and conversion rates, and outcomes of resections for liver metastases in selected and unselected populations.**

| Reference                                  | Kanas et al. Clin Epidemiol 2012 | Robertson et al. Cancer 2009 | Folprecht et al. Ann Oncol 2005 | Sjovall et al. Eur J Surg Oncol 2004 | Noren et al Eur J Cancer 2016 | Scherman et al. BJS Open 2020         | Angelsen et al. Br J Surg 2017       | Booth et al. Eur J Surg Oncol 2016 | Scheele et al. Br J Surg 1990   | Hackl et al. BMC Cancer 2014                                 |                                      |
|--------------------------------------------|----------------------------------|------------------------------|---------------------------------|--------------------------------------|-------------------------------|---------------------------------------|--------------------------------------|------------------------------------|---------------------------------|--------------------------------------------------------------|--------------------------------------|
| Population                                 | Meta-analysis                    | Population                   | Systemic review                 | Review                               | Population                    | Population                            | Population                           | Population                         | Population                      | Real life                                                    | Population                           |
| Unselected vs Selected population          | Selected                         | Selected                     | Selected                        | Unselected                           | Unselected                    | Unselected                            | Unselected                           | Unselected                         | Unselected                      | Unselected/selected                                          | Unselected                           |
| Single-site vs multisite metastases        | Single-site                      | Single-site                  | Single-site                     | Multi-site                           | Single-site                   | Single-site                           | Single-site                          | Single-site                        | Single-site                     | Single-site                                                  | Single-site                          |
| Prospective vs retrospective               | Retrospective                    | Retrospective                | Retrospective                   | Retrospective                        | Retrospective                 | Retrospective                         | Retrospective                        | Retrospective                      | Retrospective                   | Retrospective                                                | Retrospective                        |
| <b>Study name/definition</b>               | <b>Review</b>                    | <b>USA</b>                   | <b>Review</b>                   | <b>Review</b>                        | <b>Swedish</b>                | <b>Swedish</b>                        | <b>Swedish</b>                       | <b>Norwegian</b>                   | <b>Canadian</b>                 | <b>German</b>                                                | <b>German</b>                        |
| <b>Treatment arm or study population</b>   | <b>86studies</b>                 | <b>Medicare (1 site)</b>     | <b>5studies</b>                 | <b>14 studies</b>                    | <b>Population (1 region)</b>  | <b>Population based</b>               | <b>Population based (nationwide)</b> | <b>Population based</b>            | <b>Canadian (1 region)</b>      | <b>Not resectable vs resectable not resected vs resected</b> | <b>Population-based (30 centres)</b> |
| Inclusion period                           | <2010                            | 2000-2004                    | <2005                           | <2005                                | 1996-1999                     | 2007-2011                             | 2009-2013                            | 2011-2013                          | 1994-2009 (1994-1999→2005-2009) | 1960-1987                                                    | 2002-2007                            |
| Number of patients                         | 20,745                           | 3957                         | 503                             | 3349                                 | 508                           | 3149                                  | 1325                                 | 2960                               | 2717                            | 1209                                                         | 1426                                 |
| Target population                          | Liver metastases                 | Liver metastases             | Liver metastases                | mCRC                                 | Liver metastases              | Synchronous liver metastases          | Liver metastases                     | Liver metastases                   | Liver metastases                | Liver metastases                                             | Liver metastases                     |
| Age, median (range)                        |                                  |                              |                                 |                                      | 73 (30-95)                    |                                       | 66 (25-87)                           | 71 (23-104)                        | 64 (14-94)                      | 60 (22-91)                                                   | 68                                   |
| Elderly (>70 years if not noted otherwise) |                                  | 73 %                         |                                 |                                      |                               | 31% (>75)                             |                                      |                                    | 16% (>75)                       |                                                              | 42 %                                 |
| Male gender                                |                                  | 55 %                         |                                 |                                      | 50 %                          | 59 %                                  | 61 %                                 | 56 %                               | 59 %                            | 61 %                                                         | 61 %                                 |
| PS 0                                       |                                  |                              |                                 |                                      |                               |                                       |                                      |                                    |                                 |                                                              |                                      |
| PS 2-3                                     |                                  |                              |                                 |                                      |                               |                                       |                                      |                                    |                                 |                                                              |                                      |
| Single-site metastases                     |                                  |                              |                                 |                                      | 52 %                          | 100 %                                 |                                      | 57 %                               |                                 |                                                              |                                      |
| Median number metastatic sites             |                                  |                              |                                 |                                      | 1                             | 1                                     |                                      | 1                                  |                                 |                                                              |                                      |
| Synchronous metastases                     |                                  |                              |                                 |                                      | 64 %                          | 100 %                                 | 56 %                                 | 24 %                               |                                 | 59 %                                                         | 71 %                                 |
| Liver metastases                           |                                  |                              |                                 |                                      | 100 %                         | 100 %                                 | 100 %                                | 100 %                              | 100 %                           | 100 %                                                        | 100 %                                |
| Liver only                                 |                                  |                              |                                 |                                      | 52 %                          | 100 %                                 |                                      | 57 %                               | majority                        |                                                              |                                      |
| Lung metastases                            |                                  |                              |                                 |                                      |                               |                                       |                                      | 23 %                               |                                 |                                                              |                                      |
| Lung only                                  |                                  |                              |                                 |                                      |                               |                                       |                                      |                                    |                                 |                                                              |                                      |
| Target site metastases only                |                                  |                              |                                 |                                      |                               |                                       |                                      |                                    |                                 |                                                              |                                      |
| Rectal primary tumour                      |                                  |                              |                                 |                                      | 0 %                           | 30 %                                  | 35 %                                 |                                    |                                 |                                                              | 32 %                                 |
| Colon primary tumour                       |                                  |                              |                                 |                                      | 100 %                         | 70 %                                  |                                      | 72 %                               |                                 |                                                              | 68 %                                 |
| Right colon                                |                                  |                              |                                 |                                      | 55 %                          | 35 %                                  | 24 %                                 |                                    |                                 |                                                              |                                      |
| Left colon                                 |                                  |                              |                                 |                                      | 45 %                          | 35 %                                  | 38 %                                 |                                    |                                 |                                                              |                                      |
| Primary tumour resection                   |                                  |                              |                                 |                                      |                               |                                       |                                      |                                    |                                 |                                                              |                                      |
| Prior radiotherapy for primary tumour      |                                  |                              |                                 |                                      |                               |                                       |                                      |                                    |                                 |                                                              |                                      |
| Prior adjuvant therapy for primary tumour  |                                  |                              |                                 |                                      |                               |                                       |                                      |                                    |                                 |                                                              |                                      |
| KRAS / RAS wild-type                       |                                  |                              |                                 |                                      |                               |                                       |                                      |                                    |                                 |                                                              |                                      |
| KRAS ± NRAS mutant                         |                                  |                              |                                 |                                      |                               |                                       |                                      |                                    |                                 |                                                              |                                      |
| BRAFV600E mutant                           |                                  |                              |                                 |                                      |                               |                                       |                                      |                                    |                                 |                                                              |                                      |
| Technical resectability rate               |                                  |                              |                                 |                                      | 10% (upfront)                 |                                       |                                      |                                    |                                 |                                                              |                                      |
| Response rate to systemic therapy          |                                  |                              | 48-73%                          | 31-81%                               |                               |                                       |                                      |                                    |                                 |                                                              |                                      |
| Duration of systemic therapy (months)      |                                  |                              |                                 |                                      |                               |                                       |                                      |                                    |                                 |                                                              |                                      |
| Conversion rate                            |                                  |                              |                                 |                                      |                               |                                       |                                      |                                    |                                 |                                                              |                                      |
| Resection rate R0-1                        |                                  |                              | 24-54%                          |                                      | 4% all / 8% liver-only        |                                       |                                      | 18 %                               | 2→4% of all mCRC                | 18 %                                                         | 26 % (17%→32%)                       |
| Resection rate R0-2                        |                                  | Only resected                |                                 | 1-26%                                |                               | 18 %                                  |                                      | 20 %                               |                                 | 19 %                                                         |                                      |
| Local ablative therapy                     |                                  |                              |                                 |                                      | 2% all/5% liver-only          |                                       |                                      |                                    |                                 |                                                              |                                      |
| Mean number of resections/LAT              |                                  |                              |                                 |                                      |                               |                                       |                                      |                                    |                                 |                                                              |                                      |
| Pre-metastectomy chemotherapy              |                                  |                              |                                 |                                      |                               | 18 %                                  |                                      |                                    | 11→38%                          |                                                              |                                      |
| Post-metastectomy adjuvant therapy         |                                  |                              |                                 |                                      |                               |                                       |                                      |                                    |                                 |                                                              |                                      |
| Perioperative therapy                      |                                  |                              |                                 |                                      |                               |                                       |                                      |                                    | 44→65%                          |                                                              |                                      |
| Duration of systemic therapy               |                                  |                              |                                 |                                      |                               |                                       |                                      |                                    |                                 |                                                              |                                      |
| Median OS (months) *                       | 43 (20-88)                       | 27                           |                                 |                                      | 12 (treatment) - (resected)   | 9 (not resected) 57 (resected) -/-45% |                                      | 11 all / >48 resected              | 36→52                           | 7-14 not /13-25 resected                                     | 52 resected/ 23 not                  |
| OS 1/3/5-year rate – resected*             | -/30-80/16-74%                   | 75/45/25%                    |                                 |                                      | -/53%/-                       | -/-45%                                | 90/70/50%                            | 93/73%/-                           | -/-36→46%                       | 80/38/31%                                                    | -/-/32%                              |
| OS 1/3/5-year rate all*                    |                                  |                              |                                 |                                      | 40/12/3%                      |                                       |                                      |                                    |                                 |                                                              | -/-/18% not resected                 |
| Median PFS (months)*                       |                                  |                              |                                 |                                      |                               |                                       |                                      |                                    |                                 |                                                              |                                      |
| Median RFS or DFS (months)*                |                                  |                              | 9-33                            |                                      |                               |                                       |                                      |                                    |                                 |                                                              |                                      |
| RFS or DFS rate 1/3/5-year resected*       | -/-7-48%                         |                              |                                 |                                      |                               |                                       |                                      |                                    |                                 |                                                              |                                      |

References: Kanas<sup>1</sup>, Robertson<sup>2</sup>, Folprecht<sup>3</sup>, Sjovall<sup>4</sup>, Noren<sup>5</sup>, Scherman<sup>6</sup>, Angelsen<sup>7</sup>, Booth<sup>8</sup>, Scheele<sup>9</sup>, Hackl<sup>10</sup>

\* Extrapolation from curve if not presented in text

**Appendix Table 2. Systemic mini-review of literature for resectability, resection and conversion rates, and outcomes of resections for lung, lymph node, peritoneal and local recurrence in selected and unselected populations.**

| Reference                                  | Tampellini et al. Oncologist 2012 | Li et al. World J Gastroenterol 2010 | Guerrera et al. J Thorac Dis 2016       | Booth et al. Ann Surg Oncol 2016   | Isom et al. Surg Oncol 2020    | Elias et al. J Clin Oncol 2010       | Kyang et al. J Surg Oncol 2019 | Al-Busaidi et al. ANZ J Surg 2019  | Ursem et al. Oncologist 2020                 | Ikoma et al. J Clin Oncol 2017               | Yun et al. Medicine 2016                     |
|--------------------------------------------|-----------------------------------|--------------------------------------|-----------------------------------------|------------------------------------|--------------------------------|--------------------------------------|--------------------------------|------------------------------------|----------------------------------------------|----------------------------------------------|----------------------------------------------|
| Population                                 | Population                        | Real-world                           | Population                              | Population                         | Population                     | Population                           | Population                     | Population                         | Population                                   | Population                                   | Population                                   |
| Unselected vs Selected population          | Selected                          | Unselected                           | Selected                                | Selected                           | Selected                       | Selected                             | Selected                       | Selected                           | Unselected                                   | Unselected                                   | Unselected                                   |
| Single-site vs multisite metastases        | Single-site                       | Single-site                          | Single-site                             | Single-site                        | Single-site                    | Single-site                          | Single-site                    | Single-site                        | Single-site                                  | Single-site                                  | Single-site                                  |
| Prospective vs retrospective               | Retrospective                     | Prospective                          | Retrospective                           | Retrospective                      | Retrospective                  | Retrospective                        | Retrospective                  | Retrospective                      | Retrospective                                | Retrospective                                | Retrospective                                |
| <b>Study name</b>                          | <b>Italian</b>                    | <b>Conversion unresectable</b>       | <b>Italian</b>                          | <b>Canadian</b>                    | <b>USA</b>                     | <b>French speaking countries</b>     | <b>Australian</b>              | <b>New Zealand</b>                 | <b>USA</b>                                   | <b>USA</b>                                   | <b>South Korea</b>                           |
| <b>Treatment arm or study population</b>   | <b>(3 centres)</b>                | <b>Real-world (1 center)</b>         | <b>Population-based (1 institution)</b> | <b>Population-based (1 region)</b> | <b>Population-based (SEER)</b> | <b>Population-based (23 centres)</b> | <b>Region</b>                  | <b>Population-based (1 region)</b> | <b>Population-based (single institution)</b> | <b>Population-based (single institution)</b> | <b>Population-based (single institution)</b> |
| Inclusion period                           | 1994-2010                         | 2003-2008                            | 2004-2012                               | 1994-2009                          | 2004-2013                      | 1990-2007                            | 1996-2018                      | 2000-2016                          | 2009-2017                                    | 1993-2008                                    | 1994-2008                                    |
| Number of patients                         | 409                               | 70                                   | 188                                     | 709 (126,283 CRC)                  | 90 resected/749 n              | 523                                  | 363                            | 31                                 | 108                                          | 27                                           | 147                                          |
| Target population                          | Lung metastases                   | Lung conversion                      | Lung metastases                         | Operated lung metastases           | Operated lymph nodes           | Peritoneal carcinomatosis            | Peritoneal carcinomatosis      | Ovarian metastases                 | Ovarian metastases                           | Local recurrence                             | Local recurrence                             |
| Age, median (range)                        | 63 (27-87)                        |                                      | 66 (58-72)                              | 65                                 | 63 (54-74)                     | 54 (16-88)                           |                                | 55 (28-77)                         | 50 (19-106)                                  | 56 (48-68)                                   | 58 (22-87)                                   |
| Elderly (>70 years if not noted otherwise) |                                   | 40% (>60)                            |                                         | 17% (>75)                          |                                |                                      |                                |                                    |                                              |                                              | 45% (>60)                                    |
| Male gender                                | 59 %                              | 30 %                                 | 58 %                                    | 52 %                               | 50 %                           | 43 %                                 | 44 %                           | 0 %                                | 0 %                                          | 44 %                                         | 57 %                                         |
| PS 0                                       | 0-1 77%                           |                                      | 63 %                                    |                                    |                                | 76 %                                 |                                |                                    |                                              |                                              |                                              |
| PS 2-3                                     | 5 %                               |                                      | 15 %                                    | majority                           |                                | 4 %                                  |                                |                                    |                                              |                                              |                                              |
| Single-site metastases                     | 38 %                              |                                      | 68 %                                    |                                    |                                |                                      |                                | 19 %                               |                                              | 100 %                                        |                                              |
| Median number metastatic sites             | 1                                 |                                      | 1                                       |                                    |                                |                                      |                                |                                    |                                              | 1                                            |                                              |
| Synchronous metastases                     | 22-43%                            | 27 %                                 |                                         |                                    |                                | 35 %                                 |                                | 71 %                               | 64 %                                         | 0 %                                          |                                              |
| Liver metastases                           | 55 %                              |                                      | 28 %                                    | 30 %                               |                                | 15 %                                 |                                |                                    | 43 %                                         |                                              |                                              |
| Liver only                                 | 0 %                               |                                      | 0 %                                     | 0 %                                |                                | 0 %                                  |                                |                                    |                                              |                                              |                                              |
| Lung metastases                            | 100 %                             | 100 %                                | 100 %                                   | 100 %                              |                                |                                      |                                |                                    |                                              | 15 %                                         |                                              |
| Lung only                                  | 47 %                              | 100 %                                |                                         |                                    |                                |                                      |                                |                                    |                                              |                                              |                                              |
| Target site metastases                     | 89 %                              |                                      |                                         |                                    | 100 %                          | 83 %                                 |                                | other present                      | 12 %                                         | 100 %                                        | 72 %                                         |
| Rectal primary tumour                      | 35 %                              | 67 %                                 |                                         |                                    | 41 %                           | 8 %                                  |                                | 24 %                               |                                              | 100 %                                        | 100 %                                        |
| Colon primary tumour                       | 65 %                              | 33 %                                 |                                         |                                    | 59 %                           | 92 %                                 |                                | 76 %                               |                                              | 0 %                                          | 0 %                                          |
| Right colon                                |                                   |                                      |                                         |                                    |                                | 42 %                                 |                                |                                    | 25 %                                         |                                              |                                              |
| Left colon                                 |                                   |                                      |                                         |                                    |                                | 50 %                                 |                                |                                    | 50 % (left+rectum)                           |                                              |                                              |
| Primary tumour resection                   |                                   |                                      |                                         |                                    | 100 %                          | 100 %                                |                                | 87 %                               | 71 %                                         | 100 %                                        | 100 %                                        |
| Prior radiotherapy for primary tumour      |                                   |                                      |                                         |                                    |                                |                                      |                                |                                    |                                              | 100 %                                        | 20 %                                         |
| Prior adjuvant therapy for primary tumour  |                                   |                                      |                                         |                                    |                                |                                      |                                |                                    | 82 %                                         |                                              |                                              |
| KRAS / RAS wild-type                       |                                   |                                      |                                         |                                    |                                |                                      |                                |                                    | 44% (31% unknown)                            |                                              |                                              |
| KRAS ± NRAS mutant                         |                                   |                                      |                                         |                                    |                                |                                      |                                |                                    | 26 %                                         |                                              |                                              |
| BRAFV600E mutant                           |                                   |                                      |                                         |                                    |                                |                                      |                                |                                    | 6% (43% unknown)                             |                                              |                                              |
| Technical resectability rate               | 8 % (upfront)                     | 6 (0%)                               |                                         |                                    |                                |                                      |                                |                                    | 77% (upfront unknown)                        |                                              |                                              |
| Response rate to systemic therapy          | 36-74%                            | 36%                                  |                                         |                                    |                                |                                      |                                |                                    |                                              |                                              |                                              |
| Duration of systemic therapy (months)      |                                   |                                      |                                         |                                    |                                |                                      |                                |                                    |                                              |                                              |                                              |
| Conversion rate                            | 5 %                               | 6 %                                  |                                         |                                    |                                |                                      |                                |                                    |                                              |                                              |                                              |
| Resection rate R0-1                        | 12 %                              |                                      | 99 % (only resected)                    |                                    |                                | 85 % (only resected)                 |                                | 43 %                               |                                              | 43 %                                         |                                              |
| Resection rate R0-2                        |                                   | 6 %                                  | 1 %                                     | 0.3→1% of all CRC                  | 11 %                           | 100 %                                |                                | 94 %                               | 77 %                                         |                                              | 29% of local only                            |
| Local ablative therapy                     |                                   |                                      |                                         |                                    |                                | 0 %                                  |                                |                                    |                                              |                                              |                                              |
| Mean number of resections/LAT              |                                   |                                      |                                         |                                    |                                | 1.04                                 |                                |                                    |                                              |                                              |                                              |
| Pre-metastectomy chemotherapy              |                                   | 100%                                 |                                         | 5→11%                              |                                | 71 %                                 |                                |                                    |                                              |                                              | 20%                                          |
| Post-metastectomy adjuvant therapy         | 100 %                             |                                      |                                         | 20→35%                             |                                | 47 %                                 |                                | 68 %                               |                                              |                                              | 71-90 %                                      |
| Perioperative therapy                      | 38 %                              |                                      |                                         | 22→40%                             |                                |                                      |                                |                                    |                                              |                                              |                                              |
| Duration of systemic therapy               |                                   |                                      |                                         |                                    |                                |                                      |                                |                                    |                                              |                                              |                                              |
| Median OS (months)*                        | 72 resected/ 24-31 not            | 19 all                               |                                         | 36→51 resected                     | 33 resected/ 29 not            | 30                                   | 35                             | 31 resected/ 24 not                | 37 resected/ 25 not                          | 43 resected/ 38 not                          | 100 resected/ 20 not                         |
| OS 1/3/5-year rate – resected*             | 98/93/75%                         | 50% (2 yr)?                          | 95/68/53%                               | -/-/40%                            | 76/42/30%                      | 81/41/27%                            | -/49/33%                       | -/-/30% R0                         |                                              | 80/70/40%                                    | 100/82/58%                                   |
| OS 1/3/5-year rate all*                    | 90/30/10%                         | 39% (2 yr)                           |                                         |                                    |                                |                                      |                                | -/-/12%                            | -/-/11                                       | 80/65/35%                                    | 75/37/19%                                    |
| Median PFS (months)                        | 26 resected/ 10-11 not            | 8 all                                |                                         |                                    |                                |                                      |                                |                                    |                                              |                                              |                                              |
| Median RFS or DFS or TTR (months)*         |                                   |                                      |                                         |                                    |                                |                                      | 11                             | 11                                 |                                              | 8                                            |                                              |
| RFS or DFS rate 1/3/5-year resected*       | 95/50/28%                         |                                      | -/-/33%                                 |                                    |                                | 47/15/10%                            | -/20/16%                       |                                    |                                              |                                              |                                              |

References: Tampellini<sup>11</sup>, Li<sup>12</sup>, Guerrera<sup>13</sup>, Booth<sup>14</sup>, Isom<sup>15</sup>, Elias, Kyang<sup>16</sup>, Al-Busaidi<sup>17</sup>, Ursem<sup>18</sup>, Ikoma<sup>19</sup>, Yun<sup>20</sup>

\* Extrapolation from curve if not presented in text

**Appendix Table 3. Systemic mini-review of literature for resectability, resection and conversion rates, and outcomes of resections for multisite metastases in randomized studies.**

| Reference                                  | Sorbye et al. Ann Oncol 2007         | Folprecht et al. Lancet Oncology 2010 |                  | Gruenberger et al. Ann Oncol 2015 |               | Cremolini et al. Lancet Oncol 2015 |                  | Douillard et al. Eur J Cancer 2015 |            | Venook et al JAMA 2017     |                     | Stintzing et al. Lancet Oncol 2016; Heinemann et al Lancet Oncol 2014 |                |
|--------------------------------------------|--------------------------------------|---------------------------------------|------------------|-----------------------------------|---------------|------------------------------------|------------------|------------------------------------|------------|----------------------------|---------------------|-----------------------------------------------------------------------|----------------|
| Population                                 | Phase II-III randomized              | Phase II randomized                   |                  | Phase II randomized               |               | Phase III randomized               |                  | Phase III randomized               |            | Phase III randomized       |                     | Phase III randomized                                                  |                |
| Unselected vs Selected population          | Selected                             | Selected                              | Selected         | Selected                          | Selected      | Selected                           | Selected         | Selected                           | Selected   | Selected                   | Selected            | Selected                                                              | Selected       |
| Single-site vs multisite metastases        | Multisite                            | Single-site (liver)                   |                  | Multisite                         |               | Multisite                          |                  | Multisite                          |            | Multisite                  |                     | Multisite                                                             |                |
| Prospective vs retrospective               | Prospective                          | Prospective                           |                  | Prospective                       |               | Prospective                        |                  | Prospective                        |            | Prospective                |                     | Prospective                                                           |                |
| Study name                                 |                                      | CELIM                                 |                  | OLIVIA                            |               | TRIBE                              |                  | PRIME                              |            | CALGB 80405                |                     | FIRE-3                                                                |                |
| Treatment arm or study population          | Median per study (Range all studies) | FOLFOX + cetux.                       | FOLFIRI + cetux. | FOLFOXIRI+ bev.                   | FOLFOX + bev. | FOLFIRI + bev.                     | FOLFOXIRI + bev. | FOLFOX + panit.                    | FOLFOX     | Doublet + bev.             | Doublet + cetux.    | FOLFIRI + cetux.                                                      | FOLFIRI + bev. |
| Inclusion period                           | 2001-2005                            | 2004-2008                             |                  | 2008-2011                         |               | 2008-2011                          |                  | 2006-2008                          |            | 2005-2012                  |                     | 2007-2012                                                             |                |
| Number of patients                         | 21,214 mCRCs                         | 56                                    | 55               | 41                                | 39            | 256                                | 252              | 253                                | 252        | 559                        | 578                 | 199                                                                   | 201            |
| Target population                          | Study patients with mCRC             | Unresectable liver metastases         |                  | mCRC Liver conversion             |               | mCRC                               |                  | mCRC                               |            | KRAS exon 2 wild-type mCRC |                     | KRAS exon 2 wild-type mCRC                                            |                |
| Age, median (range)                        | 62                                   | 65 (57-71)                            | 62 (56-68)       | 63 (32-77)                        | 57 (28-80)    | 60 (53-67)                         | 61 (52-68)       | 61 (27-81)                         | 61 (24-82) | 59 (22-85)                 | 59 (21-90)          | 64                                                                    | 65             |
| Elderly (>70 years if not noted otherwise) |                                      |                                       |                  |                                   |               |                                    |                  |                                    |            |                            |                     | 32 %                                                                  | 25 %           |
| Male gender                                | 60% (33-81%)                         | 64 %                                  | 64 %             | 71 %                              | 46 %          | 61 %                               | 60 %             | 67 %                               | 63 %       | 62 %                       | 60 %                | 73 %                                                                  | 66 %           |
| PS 0                                       | 52% (8-98%)                          |                                       |                  | 56 %                              | 80 %          | 89 %                               | 90 %             | 94 % (0-1)                         | 93 % (0-1) | 58 %                       | 58 %                | 54 %                                                                  | 54 %           |
| PS 2-3                                     | 6% (0-34%)                           |                                       |                  | 5 %                               | 0 %           |                                    |                  | 6 %                                | 7 %        | 0,4 %                      | 0 %                 | 2 %                                                                   | 1 %            |
| Single-site metastases                     | 52% (5-100%)                         | 100 %                                 | 100 %            | 100 %                             | 100 %         |                                    |                  | 0-19%                              | 0-16%      |                            |                     | 43 %                                                                  | 41 %           |
| Median number metastatic sites             | 1                                    | 1                                     | 1                | 1                                 | 1             |                                    |                  |                                    |            |                            |                     | 2                                                                     | 2              |
| Synchronous metastases                     | 59% (36-81%)                         |                                       |                  | 73 %                              | 82 %          | 81 %                               | 78 %             |                                    |            | 80 %                       | 77 %                |                                                                       |                |
| Liver metastases                           | 76% (25-100%)                        | 100 %                                 | 100 %            | 100 %                             | 100 %         |                                    |                  | 86 %                               | 85 %       | 74 %                       | 73 %                | 85 %                                                                  | 82 %           |
| Liver only                                 |                                      | 100 %                                 | 100 %            | 100 %                             | 100 %         | 18 %                               | 23 %             | 19 %                               | 16 %       | 30 %                       | 32 %                | 36 %                                                                  | 31 %           |
| Lung metastases                            | 30% (3-62%)                          |                                       |                  |                                   |               |                                    |                  | 8 %                                | 12 %       | 33 %                       | 32 %                |                                                                       |                |
| Lung only                                  |                                      |                                       |                  |                                   |               |                                    |                  | 0 %                                | 0 %        |                            |                     |                                                                       |                |
| Lymph node metastases                      | 19% (7-58%)                          |                                       |                  |                                   |               |                                    |                  |                                    |            |                            |                     |                                                                       |                |
| Lymph nodes only                           |                                      |                                       |                  |                                   |               |                                    |                  |                                    |            |                            |                     |                                                                       |                |
| Peritoneal metastases                      | 11% (2-24%)                          |                                       |                  |                                   |               |                                    |                  |                                    |            | 23 %                       | 23 %                |                                                                       |                |
| Peritoneal only                            |                                      |                                       |                  |                                   |               |                                    |                  |                                    |            |                            |                     |                                                                       |                |
| Ovarian                                    |                                      |                                       |                  |                                   |               |                                    |                  |                                    |            |                            |                     |                                                                       |                |
| Ovarian-only                               |                                      |                                       |                  |                                   |               |                                    |                  |                                    |            |                            |                     |                                                                       |                |
| Local relapse                              |                                      |                                       |                  |                                   |               |                                    |                  |                                    |            |                            |                     |                                                                       |                |
| Local relapse-only                         |                                      |                                       |                  |                                   |               |                                    |                  |                                    |            |                            |                     |                                                                       |                |
| Rectal primary tumour                      | 32% (0-73%)                          | 38 %                                  | 51 %             |                                   |               |                                    |                  | 35 %                               | 35 %       |                            |                     |                                                                       |                |
| Colon primary tumour                       | 68% (27-100%)                        | 62 %                                  | 49 %             |                                   |               |                                    |                  | 65 %                               | 65 %       |                            |                     |                                                                       |                |
| Right colon                                |                                      |                                       |                  |                                   |               | 24 %                               | 35 %             |                                    |            | 31 %                       | 30 %                |                                                                       |                |
| Left colon                                 |                                      |                                       |                  |                                   |               |                                    |                  |                                    |            | 60% rectum included        | 61% rectum included |                                                                       |                |
| Primary tumour resection                   | 89% (50-100%)                        |                                       |                  | 39 %                              | 31 %          | 65 %                               | 69 %             |                                    |            | 73 %                       | 75 %                | 86 %                                                                  | 89 %           |
| Prior radiotherapy for primary tumour      | 14% (0-81%)                          | 2 %                                   | 15 %             |                                   |               |                                    |                  |                                    |            |                            |                     | 12 %                                                                  | 13 %           |
| Prior adjuvant therapy for primary         |                                      | 11 %                                  | 22 %             |                                   |               |                                    |                  | 17 %                               | 15 %       |                            |                     | 19 %                                                                  | 19 %           |
| KRAS / RAS wild-type                       |                                      | 63 %                                  | 64 %             |                                   |               | 49%                                | 48%              |                                    |            | 100/86%                    | 100%/84%            | 100 /- %                                                              | 100 /- %       |
| RAS+BRAF wild-type                         |                                      |                                       |                  |                                   |               |                                    |                  | 100 %                              | 100 %      |                            |                     |                                                                       |                |
| KRAS ± NRAS mutant                         |                                      | 27 %                                  | 25 %             |                                   |               |                                    |                  |                                    |            | 14 %                       | 16 %                |                                                                       |                |
| BRAFV600E mutant                           |                                      | 4 %                                   | 2 %              |                                   |               | 6%                                 | 8%               |                                    |            |                            |                     |                                                                       |                |
| Technical resectability rate               |                                      | 32 %                                  |                  | 0 %                               | 0 %           |                                    |                  |                                    |            |                            |                     | 23 %                                                                  | 20 %           |
| Response rate to systemic therapy          |                                      | 68 %                                  | 57 %             | 81 %                              | 62 %          | 54 %                               | 65 %             | 60 %                               | 47 %       |                            |                     | 65 %                                                                  | 59 %           |
| Duration of systemic therapy (months)      |                                      |                                       |                  | 8                                 | 6             |                                    |                  | 6                                  | 6          | 6                          | 6                   | 7                                                                     | 8              |
| Conversion rate                            |                                      | 28 % †                                |                  | 61 % †                            | 49 % †        |                                    |                  |                                    |            |                            |                     | 14 %                                                                  | 12-13 %        |
| Resection rate R0-1                        |                                      | 40 % †                                | 38 % †           | 51 % †                            | 33 % †        | 12 %                               | 15 %             | 10 %                               | 8 %        | 12% total                  |                     |                                                                       |                |
| Resection rate R0-2                        |                                      | 42 % †                                | 44 % †           | 61 % †                            | 49 % †        |                                    |                  | 14 %                               | 12 %       |                            |                     |                                                                       |                |
| Local ablative therapy                     |                                      | 9 % †                                 | 6 % †            |                                   |               |                                    |                  |                                    |            |                            |                     |                                                                       |                |
| Mean number of resections/LAT              |                                      |                                       |                  |                                   |               |                                    |                  |                                    |            |                            |                     |                                                                       |                |
| Pre-metastectomy chemotherapy              |                                      | 100 %                                 | 100 %            | 100%                              | 100%          |                                    |                  |                                    |            |                            |                     |                                                                       |                |
| Post-metastectomy adjuvant therapy         |                                      | Intent in 51%                         | Intent in 49%    |                                   |               |                                    |                  |                                    |            |                            |                     |                                                                       |                |
| Perioperative therapy                      |                                      | 100 %                                 | 100 %            |                                   |               |                                    |                  |                                    |            |                            |                     |                                                                       |                |
| Duration of systemic therapy               |                                      |                                       |                  |                                   |               |                                    |                  |                                    |            |                            |                     |                                                                       |                |
| Median OS (months)*                        |                                      |                                       |                  | Not reached                       | 32            | 26                                 | 30               | 26                                 | 20         | 29 (62 resected)           | 30 (65 resected)    | 33                                                                    | 25             |
| OS 1/3/5-year rate – resected*             |                                      |                                       |                  |                                   |               |                                    |                  |                                    |            |                            |                     |                                                                       |                |
| OS 1/3/5-year rate all*                    |                                      |                                       |                  |                                   |               | 87/35/13%                          | 85/42/36%        |                                    |            | 76/38/16%                  | 76/42/21%           | 88/47/18%                                                             | 87/33/7%       |
| Median PFS (months)*                       |                                      |                                       |                  | 19                                | 12            | 10                                 | 12               | 11                                 | 9          | 11                         | 11                  | 8                                                                     | 10             |
| Median RFS or DFS (months)*                |                                      |                                       |                  | 17                                | 8             |                                    |                  |                                    |            |                            |                     |                                                                       |                |

References: Sorbye<sup>21</sup>, Folprecht<sup>22</sup>, Gruenberger<sup>23</sup>, Cremolini<sup>24</sup>, Douillard<sup>25</sup>, Venook<sup>26</sup>, Stintzing<sup>27</sup>, Heineman et al<sup>28</sup>

† of borderline or >4 metastases

\* Extrapolation from curve if not presented in text

## METHODS – STUDY DESIGN AND PARTICIPANTS: STUDY CENTRES

**Appendix Table 4. Presentation of 21 participating hospitals with recruitment per centre, and multidisciplinary team (MDT) assessment principles at local hospitals and centralization principles for organ-specific MDTs in panel A. Investigators from 21 participating hospital in panel B**

**A.**

| Hospital                                 | Recruitment period (months) | Included / eligible | Recruitment% | Preop MDT colon/ rectal    | Postop MDT colon/ rectal   | Organ specific MDT | Local MDT liver  | Local MDT lung   | Local MDT peritoneum | Local MDT LAT    | Most demanding cases |  |
|------------------------------------------|-----------------------------|---------------------|--------------|----------------------------|----------------------------|--------------------|------------------|------------------|----------------------|------------------|----------------------|--|
| 1 Helsinki university hospital           | 70                          | 371                 | 49           | All                        | Selected                   | Selected           | Helsinki         | Helsinki         | Helsinki             | Helsinki         | Helsinki             |  |
| 2 Tampere university hospital            | 56                          | 129                 | 40           | All                        | All                        | Selected           | Tampere          | Tampere          | Helsinki             | Tampere          | Helsinki             |  |
| 3 Turku university hospital              | 59                          | 150                 | 56           | Selected                   | All                        | Selected           | Turku            | Turku            | Helsinki             | Turku            | Helsinki             |  |
| 4 Oulu university hospital               | 68                          | 176                 | 73           | All                        | All                        | Selected           | Oulu             | Oulu             | Oulu                 | Oulu             | Helsinki             |  |
| 5 Kuopio university hospital             | 40                          | 34                  | 49           | All                        | All                        | Selected           | Kuopio           | Kuopio           | Helsinki             | Kuopio           | Helsinki             |  |
| 6 Central Finland Central Hospital       | 49                          | 89                  | 54           | All                        | All                        | Selected           | Keski-Suomi      | Keski-Suomi      | Oulu                 | Tampere/Helsinki | Helsinki             |  |
| 7 Satakunta central hospital             | 49                          | 63                  | 70           | Colon all, rectal selected | Colon all, rectal selected | Selected           | Turku/Helsinki   | Turku/Helsinki   | Helsinki             | Turku/Helsinki   | Helsinki             |  |
| 8 Päijät-Häme central hospital           | 19                          | 11                  | 47           | Selected                   | Selected                   | Selected           | Tampere/Helsinki | Tampere/Helsinki | Helsinki             | Tampere/Helsinki | Helsinki             |  |
| 9 South Ostrobothnia central hospital    | 7                           | 1*                  | 8            | Selected                   | Selected                   | Selected           | Tampere          | Tampere          | Helsinki             | Tampere          | Helsinki             |  |
| 10 Kymenlaakso central hospital          | 7                           | 2*                  | 32           | Selected                   | Selected                   | Selected           | Helsinki         | Helsinki         | Helsinki             | Helsinki         | Helsinki             |  |
| 11 Kanta-Häme central hospital           | 31                          | 30                  | 31           | Selected                   | Selected                   | Selected           | Helsinki         | Helsinki         | Helsinki             | Helsinki         | Helsinki             |  |
| 12 North Carelia central hospital        | 8                           | 6*                  | 22           | Selected                   | Selected                   | Selected           | Keski-Suomi      | Kuopio           | Oulu                 | Kuopio           | Helsinki             |  |
| 13 Vaasa Central hospital                | 19                          | 11                  | 40           | All                        | All                        | Selected           | Helsinki         | Helsinki         | Helsinki             | Turku            | Helsinki             |  |
| 14 South Carelia central hospital        | 14                          | 1*                  | 16           | Selected                   | Selected                   | Selected           | Helsinki         | Helsinki         | Helsinki             | Helsinki         | Helsinki             |  |
| 15 Lapland central hospital              | 28                          | 1*                  | 21           | Selected                   | Selected                   | Selected           | Oulu             | Oulu             | Oulu                 | Oulu             | Helsinki             |  |
| 16 South Savo central hospital           | 21                          | 3*                  | 31           | Selected                   | Selected                   | Selected           | Keski-Suomi      | Keski-Suomi      | Oulu                 | Kuopio           | Helsinki             |  |
| 17 Kainuu central hospital               | 28                          | 1*                  | 23           | Very selected              | Very selected              | Selected           | Oulu             | Oulu             | Oulu                 | Oulu             | Helsinki             |  |
| 18 Central Ostrobothnia central hospital | 35                          | 3*                  | 29           | Selected                   | Selected                   | Selected           | Oulu/Helsinki    | Oulu/Helsinki    | Oulu/Helsinki        | Oulu/Helsinki    | Helsinki             |  |
| 19 Länsi-Pohja central hospital          | 7                           | 1*                  | 24           | Selected                   | Selected                   | Selected           | Oulu             | Oulu             | Oulu                 | Oulu             | Helsinki             |  |
| 20 East Savo central hospital            | 7                           | 1*                  | 58           | Selected                   | Selected                   | Selected           | Kuopio           | Kuopio           | Oulu                 | Kuopio           | Helsinki             |  |
| 21 Åland central hospital                | 14                          | 2*                  | 61           | Selected                   | Rectal selected, colon no  | Selected           | Turku            | Turku            | Helsinki             | Turku            | Helsinki             |  |
| Median 28                                |                             | Total 1086          | Median 40%   |                            |                            |                    |                  |                  |                      |                  |                      |  |

MDT= multidisciplinary team. Preop= preoperative MDT at colon/rectal cancer diagnosis. Postop= postoperative MDT after primary surgery  
 LAT= local ablative therapy (thermal ablation, SIRT= selective intra-arterial radiotherapy, TACE= transarterial chemoembolization, radiotherapy mostly as SBRT= stereotactic body radiotherapy)  
 Selected refers to local hospital decision to refer only potentially/borderline resectable patients to MDT assessment.

\* No nurse coordinator available, fully oncologist driven.

**B.**

| Hospital                              | Investigators                                                                                                                                                                                                                                                                                                                                                                          |
|---------------------------------------|----------------------------------------------------------------------------------------------------------------------------------------------------------------------------------------------------------------------------------------------------------------------------------------------------------------------------------------------------------------------------------------|
| Helsinki University Hospital          | Pia Österlund, Helena Isoniemi, Leena-Maija Soveri, Päivi Halonen, Arno Nordin, Aki Uutela, Heikki Mäkisalo, Riikka Huuhtanen, Eila Lantto, Ali Ovisi, Juhani Kosunen, Sirpa Leppä, Petri Bono, Johanna Mattson, Jari Räsänen, Anna Lepistö, Emerik Österlund, Heidi Penttinen, Siru Mäkelä, Ari Ristimäki, Olli Carpen, Eila Lantto, Nina Lundbom, Antti Hakkarainen, Marjut Timonen. |
| Tampere University Hospital           | Tapio Salminen, Pia Österlund, Kaisa Lehtomäki, Veera Salminen, Niina Paunu, Irina Rinta-Kiikka, Martine Vornanen, Nieminen Lasse                                                                                                                                                                                                                                                      |
| Turku University Hospital             | Annika Älgars, Raija Ristimäki, Eetu Heervä, Johanna Virtanen, Eija Korkeila, Eija Sutinen, Maija Lavonius, Jari Sundström, Roberto Blanco                                                                                                                                                                                                                                             |
| Oulu University Hospital              | Raija Kallio, Markus Mäkinen, Eija Pääkkö                                                                                                                                                                                                                                                                                                                                              |
| Kuopio University Hospital            | Annamarja Lamminmäki, Hanna Stedt, Tiina Tuomisto-Huttunen, Päivi Auvinen, Vesa Kärjä, Sakari Kainulainen, Hannu-Pekka Kettunen                                                                                                                                                                                                                                                        |
| Central Finland Central Hospital      | Ilmo Kellokumpu, Kaija Vasala, Juha Kononen, Sanna Ketola, Teijo Kuopio, Kyösti Nuorva                                                                                                                                                                                                                                                                                                 |
| Satakunta Central Hospital            | Pia Österlund, Maija-Leena Murashev, Kalevi Pulkkanen, Venla Viitanen, Marko Nieppola, Elina Haalisto                                                                                                                                                                                                                                                                                  |
| Päijät-Häme Central Hospital          | Paul Nyandoto, Aino Aalto                                                                                                                                                                                                                                                                                                                                                              |
| South Pohjanmaa Central Hospital      | Timo Ala-Luhtala, Jukka Tuominiemi                                                                                                                                                                                                                                                                                                                                                     |
| Kymenlaakso Central Hospital          | Anneli Sainast, Timo Muhonen, Laura Pusa, Sanna Kosonen, Leena Helle, Terhi Hermansson                                                                                                                                                                                                                                                                                                 |
| Kanta-Häme Central Hospital           | Riitta Kokko, Laura Aroviita, Petri Nokisalmi                                                                                                                                                                                                                                                                                                                                          |
| North Karelia Central Hospital        | Liisa Sailas, Heikki Tokola                                                                                                                                                                                                                                                                                                                                                            |
| Vaasa Central Hospital                | Antti Jekunen, Teemu Pöytä Kangas                                                                                                                                                                                                                                                                                                                                                      |
| South Carelia Central Hospital        | Kari Möykkynen, Sanna Kosonen, Timo Muhonen                                                                                                                                                                                                                                                                                                                                            |
| Lapland Central Hospital              | Olli-Pekka Isokangas, Svea Vaarala                                                                                                                                                                                                                                                                                                                                                     |
| South Savo Central Hospital           | Terhi Hermansson, Tuula Klaavuniemi, Rainer Kolle                                                                                                                                                                                                                                                                                                                                      |
| Kainuu Central Hospital               | Raija Kallio, Peeter Karihtala, Mirja Heikkinen                                                                                                                                                                                                                                                                                                                                        |
| Central Ostrobothnia Central Hospital | Kaisu Johansson, Anna Sjöstrand, Piia Kajasviita                                                                                                                                                                                                                                                                                                                                       |
| Länsi-Pohja central hospital          | Jaana Kaleva-Kerola                                                                                                                                                                                                                                                                                                                                                                    |
| East Savo Central Hospital            | Esa Männistö                                                                                                                                                                                                                                                                                                                                                                           |
| Åland Central Hospital                | Reneé Lindvall-Andersson, Tom Kaunistmaa, Pia Vihinen, Nina Cavalli-Björkman                                                                                                                                                                                                                                                                                                           |

## **METHODS – STUDY DESIGN AND PARTICIPANTS: POWER CALCULATION**

Exact a priori information was not available to be used in sample size calculations. Thus, the sample size calculation was performed in order to get a rough estimate of the required sample size. As guidance to sample size calculation in order to detect a hazard ratio (HR) for death of 0.70 in the resected and/or ablated patient group compared with the no-resection group treated with first-line systemic therapy, with a two-sided type 1 error of 0.05 and type 2 error of 0.20, 671 patients were needed, assuming 2-year mOS in the no-resection group. A 5-year accrual period was planned, with 1% loss-to-survival follow-up was assumed. On the bases of presumed treatment allocation of 25% resected or ablated and 75% treated with systemic therapy, 329 deaths were targeted for the final overall survival analysis.

The Finnish Cancer Registry provided population-based data on the incidence and mortality of CRC in each hospital district (Figure 1). An eligibility rate for first-line treatment of 61% was assumed based on Scandinavian data.<sup>29</sup> Recruited proportion per active years of recruitment was calculated for each hospital and approximately 40% of eligible patients were enrolled (Figure 1 and Appendix Table 2).

## METHODS – STUDY DESIGN AND PARTICIPANTS: PROTOCOL VIOLATION

**Appendix Table 5. Number of centres with protocol violations.**

| <b>Protocol Violations</b>                                                                         | <b>N=21</b> |
|----------------------------------------------------------------------------------------------------|-------------|
| Consent Form - person taking consent appears not to have written own name, signed and/or dated ICF | 3           |
| Consent form dates inconsistent                                                                    | 4           |
| Consent after inclusion period -exclusion                                                          | 1           |
| Correcting of mistakes on ICF not done according to GCP                                            | 7           |
| Eligibility deviation - patient exclusion                                                          | 4           |
| Inadequate maintenance of Delegation Log/CVs                                                       | 21          |
| Protocol procedure not followed                                                                    | 4           |
| SAE reporting timeframe deviation                                                                  | 21          |
| Trial procedure carried out outside of protocol timeframe                                          | 1           |

R A X O

[Back](#)

Patient data

|                                                        |                                                                                                                                                                                                                                                                                                                                                                                |
|--------------------------------------------------------|--------------------------------------------------------------------------------------------------------------------------------------------------------------------------------------------------------------------------------------------------------------------------------------------------------------------------------------------------------------------------------|
| Patient number                                         | <input type="text"/>                                                                                                                                                                                                                                                                                                                                                           |
| Patient identity number                                | <input type="text"/>                                                                                                                                                                                                                                                                                                                                                           |
| Hospital                                               | <input type="text" value="Choose"/>                                                                                                                                                                                                                                                                                                                                            |
| Primary tumour diagnosis<br>(Date of biopsy/operation) | <input type="text"/> (dd/mm/yyyy)                                                                                                                                                                                                                                                                                                                                              |
| ICD-10 DG                                              | <input type="text" value="Choose"/>                                                                                                                                                                                                                                                                                                                                            |
| pTNM, if operated                                      | <input type="text"/> Date of operation <input type="text"/> (dd/mm/yyyy)                                                                                                                                                                                                                                                                                                       |
| Date of diagnosis of metastasis                        | <input type="text"/> (dd/mm/yyyy)                                                                                                                                                                                                                                                                                                                                              |
| Metastatic sites                                       | <input type="checkbox"/> Liver<br><input type="checkbox"/> Lung<br><input type="checkbox"/> Peritoneum<br><input type="checkbox"/> Ovary<br><input type="checkbox"/> Bone<br><input type="checkbox"/> Brain<br><input type="checkbox"/> Lymph nodes<br><input type="checkbox"/> Local recurrence: <input type="text"/><br><input type="checkbox"/> Other: <input type="text"/> |

The following radiology will be delivered to the central radiology data base (PACS)

|                                                                                                                                                                                                                                                                                                                                                                                                                                                                                                                   |
|-------------------------------------------------------------------------------------------------------------------------------------------------------------------------------------------------------------------------------------------------------------------------------------------------------------------------------------------------------------------------------------------------------------------------------------------------------------------------------------------------------------------|
| <input type="checkbox"/> MRI<br><input type="checkbox"/> CT<br><input type="checkbox"/> PET<br><input type="checkbox"/> US                                                                                                                                                                                                                                                                                                                                                                                        |
| Date of delivery <input type="text"/> (dd/mm/yyyy)                                                                                                                                                                                                                                                                                                                                                                                                                                                                |
| Radiology not for immediate assessment, because                                                                                                                                                                                                                                                                                                                                                                                                                                                                   |
| <input type="checkbox"/> 0-1 liver segments free of metastases<br><input type="checkbox"/> >15 metastases in lungs<br><input type="checkbox"/> Comorbidity inhibits operation<br><input type="checkbox"/> Patient does not want to be operated<br><input type="checkbox"/> Primary tumour locally inoperable / only palliative surgery possible (does not include those who are assessed to be converted to operable after treatment)<br><input type="checkbox"/> Metastatic disease, no liver or lung metastases |

Other information

Appendix Figure 1. Patient and tumour characteristics from local hospital provided online via [www.raxo.fi](http://www.raxo.fi) for central assessment of resectability.



**METHODS – INTERVENTION: ONLINE INFORMATION IN SECOND OPINION**

Second opinion to regional hospital

**PATIENT**

Data arrived Date  (dd.mm.yyyy)

Patient number

Patient identity number

Diagnosis

ICD-diagnosis

---

**LIVER METASTASES**

Imaging

MRI Date of imaging  (dd.mm.yyyy)  
Date  (dd.mm.yyyy)

CT Date of imaging  (dd.mm.yyyy)  
Date  (dd.mm.yyyy)

PET Date of imaging  (dd.mm.yyyy)  
Date of  (dd.mm.yyyy)

US Date of imaging  (dd.mm.yyyy)

Number of metastases

Diameter of the largest metastasis  mm

Localization  Unilateral  Bilateral

Segments containing metastases

1  
 2  
 3  
 4  
 5  
 6  
 7  
 8

Resectable or not

Resectable  
 Not resectable now but may be convertible  
 Not resectable

Reason, if not resectable

All reasons

Localization  
 Number  
 Size  
 Extrahepatic spreading  
 Other

Main reason

Localization  
 Number  
 Size  
 Extrahepatic spreading  
 Other

---

**LUNG METASTASES**

Radiological images

MRI Date of imaging  (dd.mm.yyyy)  
Date  (dd.mm.yyyy)

CT Date of imaging  (dd.mm.yyyy)  
Date  (dd.mm.yyyy)

PET Date of imaging  (dd.mm.yyyy)  
Date of  (dd.mm.yyyy)

US Date of imaging  (dd.mm.yyyy)

Number of metastases

Diameter of the largest metastasis  mm

Localization  Unilateral  Bilateral

Localization in right lung

in the upper lobe  
 in the middle lobe  
 in the lower lobe

Localization in left lung

in the upper lobe  
 in the lower lobe

Resectable  Yes  No

---

**OTHER INFORMATION**

Other information

Other metastatic sites were recorded as absent or present, and if clearly nonresectable noted as such. Systemic treatment recommendation and request for further radiology.

**Appendix Figure 2. Repeated second opinion on resectability based on radiology in multidisciplinary team (MDT) assessment at Helsinki tertiary centre provided online via [www.raxo.fi](http://www.raxo.fi) to all 21 university and regional hospitals. Treatment decisions were local.**

## **METHODS – INTERVENTION: RADIOLOGY AND SYSTEMIC TREATMENT**

The patients underwent scanning with 64-/128-slice CT after intravenous low-osmolar non-ionic contrast (iodine-concentration 350 mgI/ml at 3 ml/sec). Baseline CT included the chest and upper abdomen in the late arterial phase, and abdomen and pelvis in the portal venous phase. Follow-up CT was performed during the portal venous phase. CT scans were reconstructed at 3-mm slices. Board-certified radiologists with 12-31 years of experience and subspecialty in abdominal radiology analysed the images, with consultation of other sub-specialties in radiology, as needed.

Each department used their own standard treatment protocols for systemic therapy based on NCCN and ESMO guidelines.<sup>30-32</sup> Treatment was continued until disease progression, intolerance, or resectability was achieved. In the conversion setting, combination therapy was used, usually a doublet or triplet chemotherapy combined with targeted agents, such as bevacizumab, cetuximab, or panitumumab, according to *RAS/BRAF*-status and sidedness.<sup>30-33</sup> In upfront resectable metastases, neoadjuvant and adjuvant oxaliplatin-based chemotherapy was recommended.<sup>34</sup> Adjuvant chemotherapy for 3 months after metastasectomy was recommended based on the physician's discretion.

## **METHODS – INTERVENTION AND OUTCOMES: RESECTABILITY, RADICALITY AND CLASSIFICATION CRITERIA AND GUARANTEE-TIME BIAS**

Liver and lung metastases were separately labelled as resectable, or unresectable (and liver further into borderline) on each assessment. Other metastatic sites were recorded as absent or present and, if clearly non-resectable, noted as such. Peritoneal carcinomatosis was assessed separately at Helsinki or Oulu university hospitals.

Resectability of liver metastases required that negative resection margins could be achieved while preserving at least 30% of the liver volume, so that at least two segments were spared, and that sufficient vascular inflow and outflow and biliary drainage were maintained. Lung metastases were considered resectable if an R0-resection was possible without pneumectomy and patients had no non-resectable extra-thoracic disease. Bilateral metastases were not a contraindication for surgery. In case of peritoneal metastases, the aim of surgical cytoreduction was removal of all visible tumour deposits within the abdominal cavity; multiple peritonectomy procedures and visceral resections were allowed. Other metastases or relapsed primary were considered resectable if surgery with an R0-resection was achievable.

R0 resection was defined as no cancer cells seen microscopically at resection margin, R1 as macroscopically radical resection but cancer cells seen microscopically at the resection margin, and R2 as macroscopic residual tumour seen at surgical specimen or no margin assessed. Patients were classified into the R2 group if later resectable organ was not curatively resected in planned two-to-four staged surgery. Local ablative therapy was grouped in the R2/LAT group as margins cannot be assessed. For cytoreductive surgery the definitions were as follows: R0 = no visible tumour left, R1= tumour deposits under 2.5mm in diameter left, R2= tumour deposits > 2.5 mm left. HIPEC was performed only if R0 or R1 is achieved.

Resection results are not provided separately for R0- and R1-resections as structured pathology reports were not originally harmonised and minimum resection margins were not uniformly reported whereas R2 resections were recorded. In LAT, the histological margins are unknown and thus grouped as R2-resected and/or LAT.

The potential for guarantee-time bias exists when survival is compared across groups defined by an event that is occurring during the follow-up. In this study the event was the resection due to re-assessment of resectability after conversion therapy. The survival times of patients with resection after conversion or neoadjuvant therapy vs. patients with upfront resection and systemic therapy only/best supportive care only groups were not comparable. For the patients with resection after conversion the total survival time is the time before resection plus the time after resection. The length of the former time may cause bias. Conditional landmark analysis was used for OS to control the bias and the fixed time of 12 months landmark was selected. The patients still in the study at 12 months were divided into categories as allocated within first 12 months and the follow-up time starts from the new zero, thus 100% for all four arms at 12 months.

## METHODS AND RESULTS – DEMOGRAPHICS AND ADJUSTED MULTIVARIABLE ANALYSIS FOR PROCEDURES OR NOT

Essential patient characteristics according to the consensus statement by Goey et al 2018<sup>35</sup> were used for demographics and in the adjusted cox-model for procedures i.e. R0/1/2-resection and/or local ablative therapy (LAT).

**Appendix Table 6. Essential patient characteristics by procedure i.e. resection and/or local ablative therapy (LAT) or not i.e. “systemic therapy alone” or best supportive care (BSC).**

|                             |                             | All patients |      | R0-1 resection |     | R2-resection and/or LAT |     | Systemic therapy alone |     |
|-----------------------------|-----------------------------|--------------|------|----------------|-----|-------------------------|-----|------------------------|-----|
|                             |                             | 1063         | 100% | 326            | 73% | 73                      | 7%  | 664                    | 61% |
| Age                         | <70                         | 708          | 67%  | 239            | 73% | 51                      | 70% | 418                    | 63% |
|                             | ≥70                         | 355          | 33%  | 87             | 27% | 22                      | 30% | 246                    | 37% |
| ECOG                        | PS 0                        | 295          | 28%  | 140            | 43% | 19                      | 26% | 136                    | 21% |
|                             | PS 1-3                      | 768          | 72%  | 186            | 57% | 54                      | 74% | 528                    | 80% |
| Primary tumour location     | Right colon                 | 300          | 28%  | 73             | 22% | 13                      | 18% | 214                    | 33% |
|                             | Left colon                  | 394          | 37%  | 142            | 44% | 34                      | 47% | 218                    | 33% |
|                             | Rectum                      | 363          | 34%  | 111            | 34% | 26                      | 36% | 226                    | 34% |
| Primary tumour resection    | Operated upfront            | 720          | 68%  | 274            | 84% | 50                      | 69% | 396                    | 60% |
|                             | Not operated                | 343          | 32%  | 52             | 16% | 23                      | 32% | 268                    | 40% |
| Prior adjuvant chemotherapy | No                          | 727          | 68%  | 178            | 55% | 46                      | 63% | 503                    | 76% |
|                             | Adjuvant chemotherapy       | 336          | 32%  | 148            | 45% | 27                      | 37% | 161                    | 24% |
| Number of metastatic sites  | 1                           | 576          | 54%  | 278            | 85% | 31                      | 43% | 267                    | 40% |
|                             | 2 to 6                      | 487          | 46%  | 48             | 15% | 42                      | 58% | 397                    | 60% |
| Liver only metastases       | Yes                         | 640          | 60%  | 90             | 28% | 47                      | 64% | 503                    | 76% |
|                             | No                          | 423          | 40%  | 236            | 72% | 26                      | 36% | 161                    | 24% |
| Liver involvement           | <25%                        | 261          | 25%  | 156            | 48% | 23                      | 32% | 82                     | 12% |
|                             | ≥25%                        | 531          | 50%  | 106            | 33% | 33                      | 45% | 392                    | 59% |
|                             | No liver metastases         | 271          | 26%  | 64             | 20% | 17                      | 23% | 190                    | 29% |
| Presentation                | Synchronous                 | 715          | 67%  | 186            | 57% | 45                      | 62% | 484                    | 73% |
|                             | Metachronous                | 348          | 33%  | 140            | 43% | 28                      | 38% | 180                    | 27% |
| RAS status                  | KRAS/NRAS wildtype          | 507          | 49%  | 165            | 52% | 25                      | 35% | 317                    | 49% |
|                             | KRAS/NRAS mutant            | 533          | 51%  | 151            | 48% | 46                      | 65% | 336                    | 52% |
| BRAF status                 | BRAF wildtype or not tested | 810          | 90%  | 264            | 96% | 59                      | 95% | 487                    | 87% |
|                             | BRAF mutant                 | 88           | 10%  | 12             | 4%  | 3                       | 5%  | 73                     | 13% |
| Mismatch repair status¶     | pMMR                        | 299          | 96%  | 102            | 31% | 19                      | 26% | 178                    | 27% |
|                             | dMMR                        | 14           | 4%   | 7              | 2%  | 0                       | 0%  | 7                      | 1%  |
|                             | Not tested                  | 750          | ..   | 217            | ..  | 54                      | ..  | 479                    | ..  |

BSC= best supportive care only; dMMR= deficient mismatch repair, ECOG = Eastern Cooperative Oncology Group; LAT = local ablative therapy; pMMR= proficient mismatch repair; PS= performance status  
¶ Proportions of total number of tested for MMR status

**Appendix Table 7. Multivariable analysis according to essential patient characteristics for OS from mCRC diagnosis for procedures versus not.**

|                             |                               | HR   | 95% confidence interval |      |
|-----------------------------|-------------------------------|------|-------------------------|------|
| Procedure                   | Resection and/or LAT vs Not   | 0.21 | 0.15                    | 0.28 |
| Age                         | ≤70 vs >70                    | 0.92 | 0.74                    | 1.14 |
| ECOG                        | PS 0 vs 1 to 3                | 0.63 | 0.49                    | 0.80 |
| Primary tumour location     | Right colon                   | 1.00 | ..                      | ..   |
|                             | Left colon                    | 0.58 | 0.44                    | 0.76 |
|                             | Rectum                        | 0.52 | 0.39                    | 0.68 |
| Primary tumour resection    | Upfront surgery vs No surgery | 0.52 | 0.40                    | 0.67 |
| Prior adjuvant chemotherapy | Yes vs No                     | 0.74 | 0.55                    | 0.99 |
| Number of metastatic sites  | 1 vs 2-6                      | 0.57 | 0.38                    | 0.85 |
| Liver only metastases       | Yes vs No                     | 0.62 | 0.38                    | 1.00 |
| Liver involvement           | < 25%                         | 1.00 | ..                      | ..   |
|                             | ≥ 25%                         | 1.17 | 0.86                    | 1.58 |
|                             | No liver metastases           | 0.94 | 0.63                    | 1.41 |
| Presentation                | Metachronous vs Synchronous   | 1.03 | 0.73                    | 1.45 |
| RAS status                  | Wildtype vs Mutant            | 0.69 | 0.55                    | 0.86 |
| BRAF status                 | Wildtype vs Mutant            | 0.42 | 0.31                    | 0.58 |
| Mismatch repair status      | pMMR                          | 1.00 | ..                      | ..   |
|                             | dMMR                          | 0.61 | 0.27                    | 1.35 |
|                             | Not tested                    | 1.09 | 0.88                    | 1.36 |

dMMR= deficient mismatch repair, ECOG = Eastern Cooperative Oncology Group; LAT = local ablative therapy; pMMR= proficient mismatch repair; PS= performance status

**Appendix Table 8. Multivariable analysis according to according to grade, stage, primary location and metastatic sites for OS from mCRC diagnosis for procedures versus not.**

|                         |                             | HR    | 95% confidence interval |       |
|-------------------------|-----------------------------|-------|-------------------------|-------|
| Procedure               | Resection and/or LAT vs Not | 0.20  | 0.17                    | 0.25  |
| Age                     | <70 vs ≥70 years            | 0.81  | 0.69                    | 0.95  |
| Sex                     | Male vs Female              | 1.01  | 0.87                    | 1.17  |
| Primary tumour location | Right colon                 | 1.00  | ..                      | ..    |
|                         | Left colon                  | 0.70  | 0.58                    | 0.84  |
|                         | Rectum                      | 0.63  | 0.53                    | 0.76  |
| Metastatic sites        | Liver                       | 1.59  | 1.30                    | 1.93  |
|                         | Lung                        | 1.12  | 0.95                    | 1.31  |
| Grade                   | Grade 1                     | 1.00  | ..                      | ..    |
|                         | Grade 2                     | 1.34  | 1.02                    | 1.76  |
|                         | Grade 3                     | 2.21  | 1.61                    | 3.02  |
|                         | Grade unknown               | 1.86  | 1.38                    | 2.53  |
| T-stage                 | T1                          | 1.00  | ..                      | ..    |
|                         | T2                          | 1.17  | 0.46                    | 2.98  |
|                         | T3                          | 1.25  | 0.53                    | 2.96  |
|                         | T4                          | 1.36  | 0.56                    | 3.26  |
|                         | T unknown                   | 1.25  | 0.34                    | 4.61  |
| N-stage                 | N0                          | 1.00  | ..                      | ..    |
|                         | N1                          | 1.08  | 0.87                    | 1.35  |
|                         | N2                          | 1.42  | 1.16                    | 1.73  |
|                         | N unknown                   | 2.45  | 1.60                    | 3.76  |
| Presentation †          | Synchronous                 | 1.00  | ..                      | ..    |
|                         | Early metachronous          | 1.068 | 0.817                   | 1.396 |
|                         | Late metachronous           | 0.911 | 0.74                    | 1.123 |

† early metachronous from diagnosis to 12 months and late metachronous more than 12 months from colorectal cancer diagnosis. HR = hazard ratio.

**RESULTS – DETAILED DEMOGRAPHICS FOR R0/1-RESECTION, R2/LAT, “SYSTEMIC THERAPY ONLY” AND BEST SUPPORTIVE CARE**

**Appendix Table 9. Detailed baseline demographics separated for treatment groups.**

|                              |                         | Total         |         | R0/1-resection |         | R2-resection & LAT |         | Systemic therapy only |         | Best supportive care |         |
|------------------------------|-------------------------|---------------|---------|----------------|---------|--------------------|---------|-----------------------|---------|----------------------|---------|
|                              |                         | 1086          | 100%    | 326            | 30%     | 73                 | 7%      | 664                   | 61%     | 23                   | 1%      |
| Age                          | Median (range)          | 66.4          | (24-90) | 64.8           | (25-84) | 66.5               | (42-82) | 67                    | (24-89) | 73.4                 | (52-90) |
|                              | <70                     | 715           | 66%     | 239            | 73%     | 51                 | 70%     | 418                   | 63%     | 7                    | 30%     |
|                              | ≥70                     | 371           | 34%     | 87             | 27%     | 22                 | 30%     | 246                   | 37%     | 16                   | 70%     |
| Sex                          | Male                    | 656           | 60%     | 199            | 61%     | 43                 | 59%     | 402                   | 61%     | 12                   | 52%     |
|                              | Female                  | 430           | 40%     | 127            | 39%     | 30                 | 41%     | 262                   | 40%     | 11                   | 48%     |
| ECOG                         | PS 0                    | 295           | 27%     | 140            | 43%     | 19                 | 26%     | 136                   | 21%     | 0                    | 0%      |
|                              | PS 1                    | 600           | 55%     | 166            | 51%     | 44                 | 60%     | 385                   | 58%     | 5                    | 22%     |
|                              | PS 2-3                  | 191           | 18%     | 20             | 6%      | 10                 | 14%     | 143                   | 22%     | 18                   | 78%     |
| Comorbidities                | No                      | 289           | 27%     | 97             | 30%     | 18                 | 25%     | 169                   | 26%     | 5                    | 22%     |
|                              | 1 to 3                  | 643           | 59%     | 188            | 58%     | 41                 | 56%     | 398                   | 60%     | 16                   | 70%     |
|                              | 4 to 12                 | 154           | 14%     | 41             | 13%     | 14                 | 19%     | 97                    | 15%     | 2                    | 9%      |
| Charlson/Deyo score          | 0                       | 834           | 77%     | 262            | 80%     | 58                 | 80%     | 495                   | 75%     | 19                   | 83%     |
|                              | 1 to 2                  | 244           | 23%     | 62             | 19%     | 15                 | 21%     | 163                   | 25%     | 4                    | 17%     |
|                              | 3 to 5                  | 8             | 1%      | 2              | 1%      | 0                  | 0%      | 6                     | 1%      | 0                    | 0%      |
| Second cancer                | Non-colorectal          | 143           | 13%     | 46             | 14%     | 6                  | 8%      | 90                    | 14%     | 1                    | 4%      |
| BMI                          | <20                     | 84            | 8%      | 25             | 8%      | 6                  | 8%      | 50                    | 8%      | 3                    | 13%     |
|                              | 20-29.9                 | 802           | 74%     | 228            | 70%     | 50                 | 69%     | 510                   | 77%     | 14                   | 61%     |
|                              | ≥30                     | 200           | 18%     | 73             | 22%     | 17                 | 23%     | 104                   | 16%     | 6                    | 26%     |
| Presentation‡                | Synchronous             | 736           | 68%     | 186            | 57%     | 45                 | 62%     | 484                   | 73%     | 21                   | 91%     |
|                              | Early metachronous      | 109           | 10%     | 38             | 12%     | 10                 | 14%     | 60                    | 9%      | 1                    | 4%      |
|                              | Late metachronous       | 241           | 22%     | 102            | 31%     | 18                 | 25%     | 120                   | 18%     | 1                    | 4%      |
| Primary tumour location      | Right colon             | 310           | 29%     | 73             | 22%     | 13                 | 18%     | 214                   | 32%     | 10                   | 44%     |
|                              | Left colon              | 396           | 37%     | 142            | 44%     | 34                 | 47%     | 218                   | 33%     | 2                    | 9%      |
|                              | Rectum                  | 374           | 34%     | 111            | 34%     | 26                 | 36%     | 226                   | 34%     | 11                   | 48%     |
|                              | Multiple                | 6             | 1%      | 0              | 0%      | 0                  | 0%      | 6                     | 1%      | 0                    | 0%      |
| Primary tumour resection‡    | Upfront surgery         | 728           | 67%     | 274            | 84%     | 50                 | 69%     | 398                   | 60%     | 6                    | 26%     |
|                              | No surgery              | 358           | 33%     | 52             | 16%     | 23                 | 32%     | 266                   | 40%     | 17                   | 74%     |
| Prior adjuvant chemotherapy† | No adjuvant             | 124           | 35%     | 46             | 33%     | 10                 | 36%     | 66                    | 37%     | 2                    | 100%    |
|                              | Fluoropyrimidine        | 99            | 28      | 34             | 24%     | 7                  | 25%     | 58                    | 32%     | 0                    | 0%      |
|                              | Oxaliplatin-based       | 127           | 36%     | 60             | 43%     | 11                 | 39%     | 56                    | 31%     | 0                    | 0%      |
| Radiotherapy for rectal‡     | No                      | 238           | 64%     | 50             | 45%     | 16                 | 62%     | 163                   | 72%     | 9                    | 82%     |
|                              | Preop. 5x5Gy            | 53            | 14%     | 31             | 28%     | 5                  | 19%     | 17                    | 8%      | 0                    | 0%      |
|                              | Preop. chemoradiation   | 64            | 17%     | 28             | 25%     | 3                  | 12%     | 33                    | 15%     | 0                    | 0%      |
|                              | Palliative radiotherapy | 19            | 5%      | 2              | 2%      | 2                  | 8%      | 13                    | 6%      | 2                    | 18%     |
| Number of metastatic sites   | 1                       | 586           | 54%     | 278            | 85%     | 31                 | 43%     | 267                   | 40%     | 10                   | 44%     |
|                              | 2                       | 319           | 29%     | 36             | 11%     | 26                 | 36%     | 249                   | 38%     | 8                    | 35%     |
|                              | 3 to 6                  | 181           | 17%     | 12             | 4%      | 16                 | 22%     | 148                   | 22%     | 5                    | 22%     |
| Site of metastases           | Liver                   | 812           | 75%     | 262            | 80%     | 56                 | 77%     | 474                   | 71%     | 20                   | 87%     |
|                              | Lung                    | 330           | 31%     | 37             | 12%     | 27                 | 37%     | 258                   | 39%     | 8                    | 35%     |
|                              | Lymph nodes             | 275           | 25%     | 15             | 5%      | 15                 | 21%     | 236                   | 36%     | 9                    | 39%     |
|                              | Peritoneum              | 175           | 16%     | 26             | 8%      | 12                 | 16%     | 133                   | 20%     | 4                    | 17%     |
|                              | Local recurrence        | 67            | 6%      | 14             | 4%      | 9                  | 12%     | 44                    | 7%      | 0                    | 0%      |
|                              | 1 other site            | 110           | 10%     | 19             | 6%      | 9                  | 12%     | 81                    | 12%     | 1                    | 4%      |
|                              | 2 other sites           | 20            | 2%      | 6              | 2%      | 2                  | 3%      | 12                    | 2%      | 0                    | 0%      |
|                              | 3-5 other sites         | 6             | 1%      | 1              | 0%      | 2                  | 3%      | 3                     | 1%      | 0                    | 0%      |
|                              | Molecular status §      | RAS wild-type | 127     | 12%            | 35      | 11%                | 6       | 8%                    | 83      | 13%                  | 3       |
| RAS & BRAF wild-type         |                         | 301           | 28%     | 118            | 37%     | 16                 | 23%     | 162                   | 25%     | 5                    | 25%     |
| RAS mutant                   |                         | 539           | 51%     | 151            | 48%     | 46                 | 65%     | 335                   | 51%     | 7                    | 35%     |
| BRAF mutant                  |                         | 93            | 9%      | 12             | 4%      | 3                  | 4%      | 73                    | 11%     | 5                    | 25%     |
| Mismatch repair status¶      | pMMR                    | 302           | 95%     | 102            | 94%     | 19                 | 100%    | 178                   | 96%     | 3                    | 75%     |
|                              | dMMR                    | 15            | 5%      | 7              | 6%      | 0                  | 0%      | 7                     | 4%      | 1                    | 25%     |
| Haemoglobin                  | <11 g/dL                | 188           | 17%     | 40             | 12%     | 8                  | 11%     | 132                   | 20%     | 8                    | 35%     |
| Leukocytes                   | >10 ^9/L                | 185           | 17%     | 25             | 8%      | 6                  | 8%      | 140                   | 21%     | 14                   | 61%     |
| Platelets                    | >400 ^9/L               | 292           | 27%     | 69             | 21%     | 15                 | 21%     | 200                   | 30%     | 8                    | 35%     |
| Albumin #                    | <30 g/L                 | 104           | 16%     | 19             | 10%     | 6                  | 14%     | 70                    | 18%     | 9                    | 60%     |
| Alkaline phosphatase #       | >105 U/L                | 373           | 35%     | 68             | 21%     | 17                 | 23%     | 274                   | 41%     | 14                   | 70%     |
| C-reactive protein #         | >10 mg/L                | 409           | 46%     | 79             | 30%     | 20                 | 33%     | 291                   | 54%     | 19                   | 86%     |
| CEA #                        | >5 µ/L                  | 758           | 71%     | 169            | 53%     | 45                 | 64%     | 525                   | 80%     | 19                   | 86%     |
| Ca 19-9 #                    | >26 kU/L                | 345           | 55%     | 65             | 39%     | 16                 | 44%     | 258                   | 62%     | 6                    | 50%     |

\*Patients were divided into four groups: curative resection (R0-1), R2 resection of metastases or primary, Local Ablative Therapy (LAT) or not all tumour sites resected curatively (R2/LAT); systemic therapy only or best supportive care only (BSC) group.

‡ early metachronous from diagnosis to 12 months and late metachronous more than 12 months from colorectal cancer diagnosis.

‡ Upfront surgery in synchronous or metachronous

BMI = body mass index; CA 19-9 = carbohydrate antigen 19-9; CEA = carcinoembryonic antigen; dMMR= deficient mismatch repair, pMMR= proficient mismatch repair; ECOG = Eastern Cooperative Oncology Group; LAT = local ablative therapy; Preop= preoperative; PS= performance status.

Data are n (%) unless otherwise specified. † Proportions of total number of metachronous. ‡ Proportions of total number of rectal cancers. § Proportions of total number tested for molecular status. ¶ Proportions of total number of tested for MMR status. # Proportions of total number with laboratory test performed.

**RESULTS – FOREST PLOT OF SUBGROUP ANALYSES FOR OVERALL SURVIVAL IN PROCEDURES VERSUS NOT**

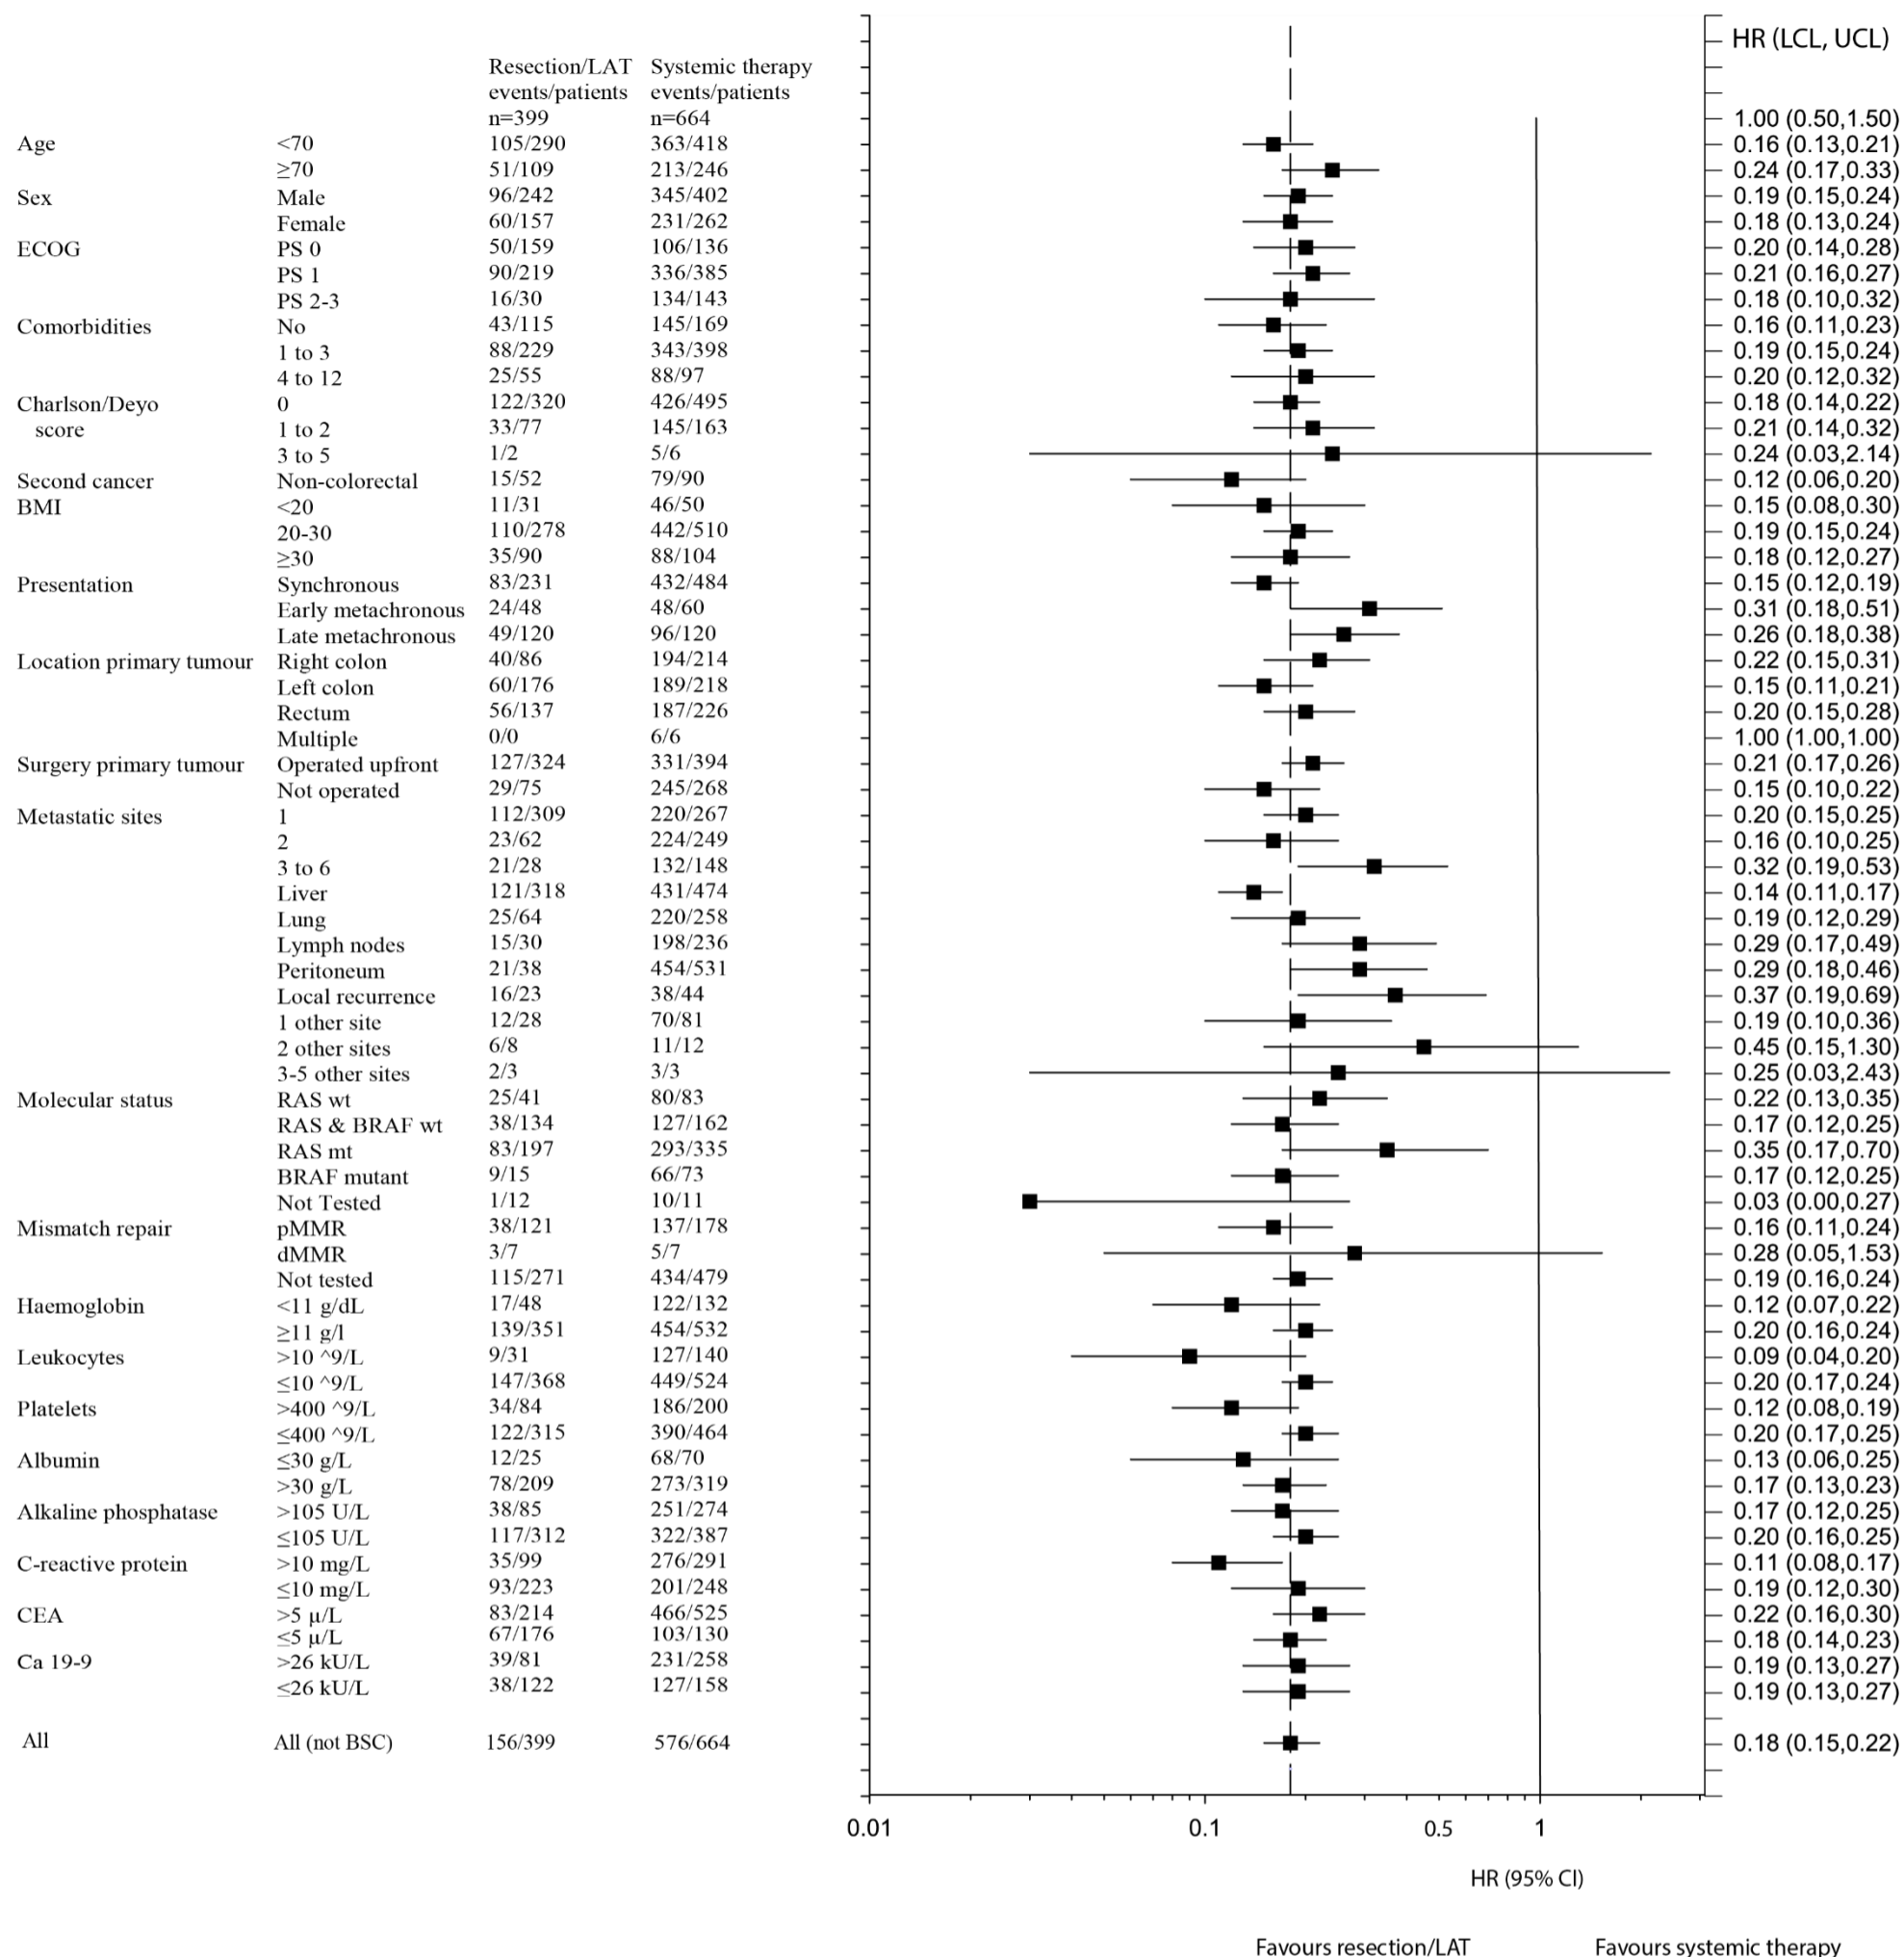

BSC = best supportive care, HR = hazard ratio, CI = confidence interval.

**Appendix Figure 3. Forest plot of subgroup analyses of overall survival. Data shown for patients resected and/or ablated or receiving systemic therapy alone (best supportive care patients excluded).**

**METHODS AND RESULTS – DEMOGRAPHICS AND ADJUSTED MULTIVARIABLE ANALYSIS FOR R0/1-RESECTION, R2/LAT, SYSTEMIC THERAPY ONLY AND BEST SUPPORTIVE CARE**

Essential patient characteristics according to the consensus statement by Goey et al 2018<sup>35</sup> were used for demographics and in the adjusted cox-model for overall survival from mCRC diagnosis in R0/1-resected, R2-resected and/or local ablative therapy (LAT), and “Systemic therapy only” groups, but Best supportive care group is omitted.

**Appendix Table 10. Multivariable analysis according to essential patient characteristics for OS from mCRC diagnosis for R0/1-resection, R2-resection and/or LAT, “Systemic therapy alone” versus Best supportive care.**

|                             |                               | HR   | 95% confidence interval |       |
|-----------------------------|-------------------------------|------|-------------------------|-------|
| Resection and/or LAT        | “Systemic therapy alone”      | 1.00 | ..                      | ..    |
|                             | R0/1-resection                | 0.16 | 0.11                    | 0.23  |
|                             | R2 and/or LAT                 | 0.47 | 0.30                    | 0.73  |
|                             | Best supportive care          | 46.9 | 21.9                    | 100.5 |
| Age                         | <70 vs ≥70                    | 0.99 | 0.79                    | 1.23  |
| ECOG                        | PS 0 vs 1 to 3                | 0.64 | 0.50                    | 0.82  |
| Primary tumour location     | Right colon                   | 1.00 | ..                      | ..    |
|                             | Left colon                    | 0.58 | 0.44                    | 0.76  |
|                             | Rectum                        | 0.49 | 0.37                    | 0.65  |
| Primary tumour resection    | Upfront surgery vs No surgery | 0.54 | 0.42                    | 0.69  |
| Prior adjuvant chemotherapy | Yes vs No                     | 0.66 | 0.49                    | 0.89  |
| Number of metastatic sites  | 1 vs 2 to 6                   | 0.56 | 0.37                    | 0.83  |
| Liver only metastases       | Yes vs No                     | 0.61 | 0.38                    | 0.99  |
| Liver involvement           | No liver metastases           | 0.89 | 0.60                    | 1.34  |
|                             | < 25%                         | 1.00 | ..                      | ..    |
|                             | ≥25%                          | 1.13 | 0.84                    | 1.53  |
| Presentation                | Metachronous vs Synchronous   | 0.97 | 0.69                    | 1.37  |
| RAS status                  | Wildtype vs Mutant            | 0.67 | 0.54                    | 0.84  |
| BRAF status                 | Wildtype vs Mutant            | 0.43 | 0.31                    | 0.60  |
| Mismatch repair status      | pMMR                          | 1.00 | ..                      | ..    |
|                             | dMMR                          | 0.54 | 0.24                    | 1.20  |
|                             | Not tested                    | 1.09 | 0.87                    | 1.35  |

dMMR= deficient mismatch repair, ECOG = Eastern Cooperative Oncology Group, HR = Hazard ratio, LAT = local ablative therapy, pMMR= proficient mismatch repair; PS= performance status.

**Appendix Table 11. Multivariable analysis according to grade, stage, primary location, presentation, and metastatic sites for OS from mCRC diagnosis for R0/1-resection, R2-resection and/or LAT, “Systemic therapy alone” versus Best supportive care.**

|                         |                          | HR    | 95% confidence interval |       |
|-------------------------|--------------------------|-------|-------------------------|-------|
| Resection and/or LAT    | “Systemic therapy alone” | 1.00  | ..                      | ..    |
|                         | R0/1-resection           | 0.16  | 0.13                    | 0.21  |
|                         | R2 and/or LAT            | 0.43  | 0.31                    | 0.59  |
|                         | Best supportive care     | 15.40 | 9.57                    | 24.78 |
| Age                     | <70 vs ≥70 years         | 1.15  | 0.98                    | 1.34  |
| Primary tumour location | Male vs Female           | 0.96  | 0.83                    | 1.12  |
|                         | Right colon              | 1.00  | ..                      | ..    |
|                         | Left colon               | 0.68  | 0.57                    | 0.82  |
| Metastatic sites        | Rectum                   | 0.59  | 0.49                    | 0.71  |
|                         | Liver                    | 1.62  | 1.33                    | 1.96  |
|                         | Lung                     | 1.10  | 0.94                    | 1.30  |
| Differentiation         | Grade 1                  | 1.00  | ..                      | ..    |
|                         | Grade 2                  | 1.32  | 1.00                    | 1.73  |
|                         | Grade 3                  | 2.18  | 1.59                    | 2.99  |
|                         | Grade unknown            | 1.74  | 1.28                    | 2.36  |
| T-stage                 | T1                       | 1.00  | ..                      | ..    |
|                         | T2                       | 1.09  | 0.43                    | 2.78  |
|                         | T3                       | 1.10  | 0.46                    | 2.61  |
|                         | T4                       | 1.19  | 0.50                    | 2.88  |
|                         | T unknown                | 1.09  | 0.30                    | 4.01  |
| N-stage                 | N0                       | 1.00  | ..                      | ..    |
|                         | N1                       | 1.03  | 0.83                    | 1.29  |
|                         | N2                       | 1.38  | 1.13                    | 1.68  |
|                         | N unknown                | 2.33  | 1.52                    | 3.59  |
| Presentation †          | Synchronous              | 1.00  | ..                      | ..    |
|                         | Early metachronous       | 1.09  | 0.83                    | 1.42  |
|                         | Late metachronous        | 0.92  | 0.75                    | 1.13  |

† early metachronous from diagnosis to 12 months and late metachronous more than 12 months from colorectal cancer diagnosis. HR = Hazard ratio, LAT = local ablative therapy.

## METHODS AND RESULTS – POPULATION-BASED LIVER RESECTION RATE ESTIMATES

Liver resection rates were recorded according to the subprotocol for the RAXO data collection trial (study protocol Appendix page 20-42). Resection data at all hospitals were not available electronically for other resections (e.g. lung, peritoneal, ovary, local relapse) than liver resections, and these will be retrieved later, some manually. Nationwide liver resection rates were retrieved from electronic registries (n=4 hospitals, with slight risk for underestimation) or reliable liver resection registries (n=2 hospitals) at all six hospitals performing liver resections (with Nordic classification of surgical procedures code JJB/JJA and ICD-10 C18, C19, or C20). Resected cases are coded to their own district regardless of the location of the hospital where the resection was performed. Helsinki performs all resections for 54% of the Finnish population (1.97/5.54 million inhabitants). To control for migration and increasing CRC incidence at the five university hospital districts, these resections were compared with cancer-registry derived population-based numbers for mCRC cases (reliable numbers for deaths due to CRC from the Finnish Cancer Registry were used instead of estimates of the number of mCRC cases, thus, slightly underestimating the number of mCRC cases) per hospital district and year. Individual patient data were provided by the Finnish Cancer Registry and Statistics Finland based on permission THL/2305/5.05.00/2019 and TK-53-733-20. The rate of liver metastases in mCRC is estimated to be 75% based on the RAXO data with 1086 Finnish patients and data from 21,214 study patients.<sup>21</sup>

During the RAXO inclusion period (2012-2018), 938 liver resections were performed nationwide and 447 in the preceding 7 years (2005-2011), with a crude estimated increase of +109%. The population-based liver resection rates increased from 9% to 14% among estimated mCRCs with liver involvement, when comparing the preceding seven years (2005-2011) to the RAXO inclusion years (2012-2018; Appendix Figure 3). The liver resections rate was 12% for patients not included in the RAXO study 2012-2018. Referrals for performed liver resection from the four university hospitals to Helsinki tertiary centre increased from 10 to 36 (+260%) when comparing the two 7-year periods. Regional differences diminished during the RAXO time period with largest improvements in the Tampere and Turku university districts (Appendix Figure 3).

Overall survival from 1<sup>st</sup> liver resection for patients (n=260+328+142) operated at Helsinki university hospital is presented in Appendix Figure 4. Median OS was 76 months for patients resected in the preceding 7 years (2005-2011), and in 2011-2018 66 months for non-RAXO patients and not reached for RAXO-patients.

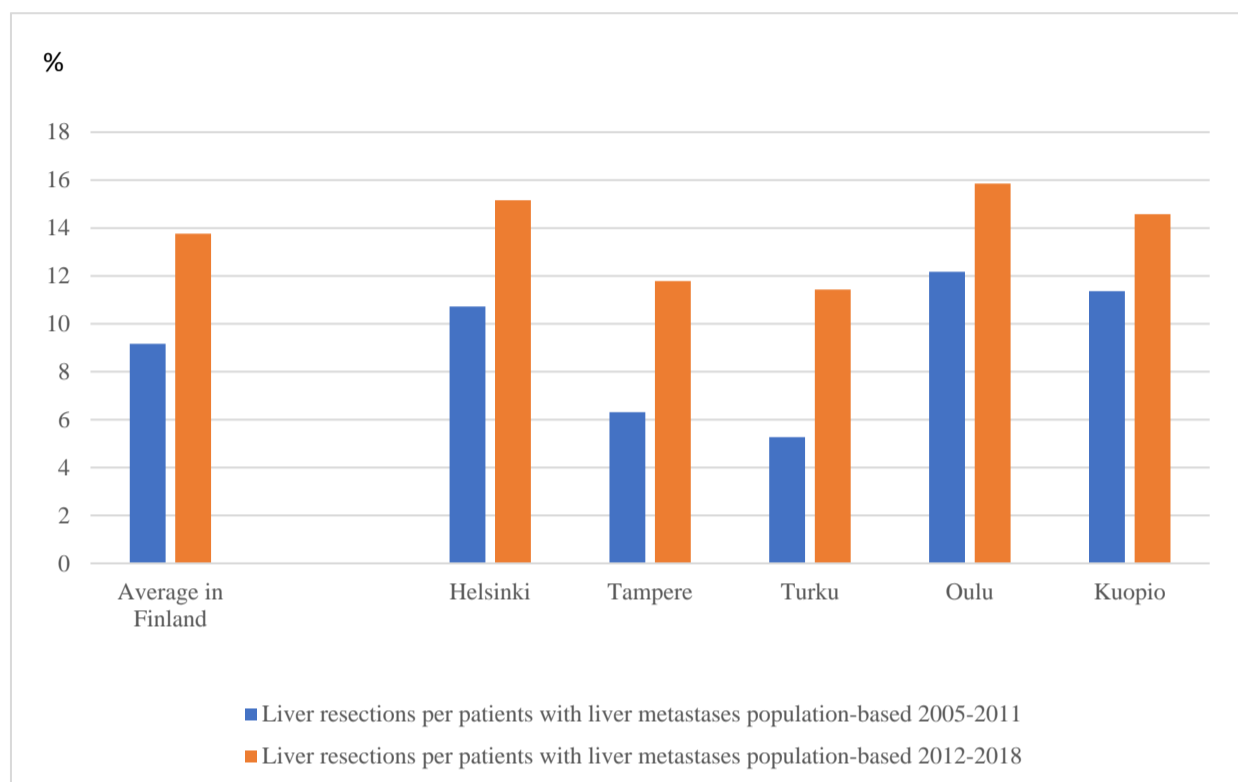

**Appendix Figure 4. Population-based liver resection rates nationwide in Finland and separately for the five university hospital districts during the RAXO inclusion period (2012-2018) and preceding seven years (2005-2011) among all estimated cases with liver metastases from colorectal cancer.**

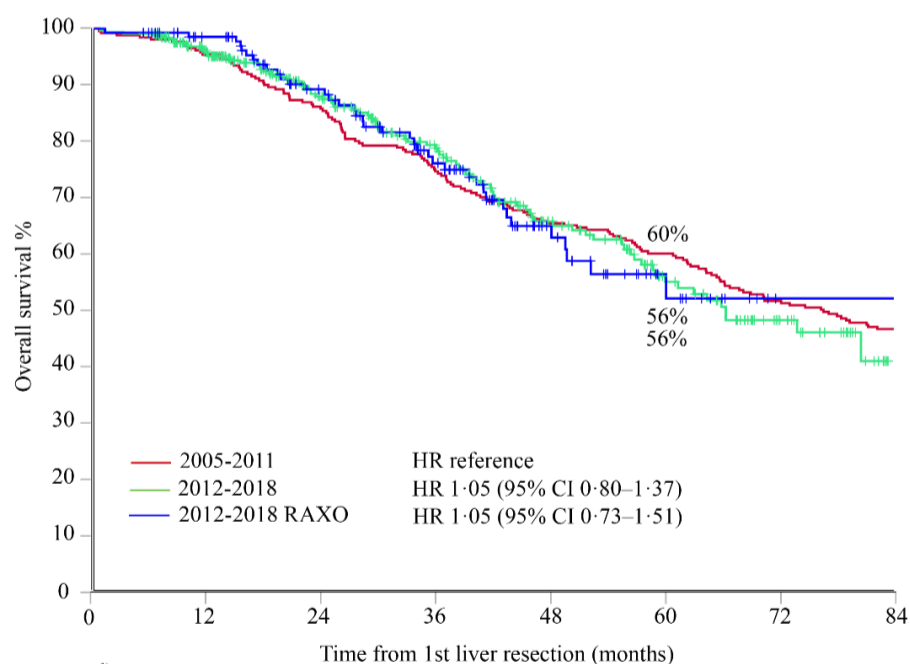

|                    | 0        | 12        | 24        | 36        | 48       | 60       | 72       | 84       |
|--------------------|----------|-----------|-----------|-----------|----------|----------|----------|----------|
| 2005-2011          | 260 (0)  | 248 (0)   | 223 (0)   | 194 (0)   | 170 (0)  | 156 (0)  | 134 (0)  | 121 (97) |
| 2011-2018 non-RAXO | 328 (42) | 273 (106) | 190 (139) | 139 (172) | 85 (193) | 53 (213) | 26 (237) | 0 (237)  |
| 2011-2018 RAXO     | 142 (14) | 126 (33)  | 96 (50)   | 66 (76)   | 32 (91)  | 13 (102) | 1 (103)  | 0 (103)  |

**Appendix Figure 5. Overall survival from 1st liver resection in patients operated at Helsinki university hospital during RAXO era and preceding 7 years.**



## METHODS AND RESULTS – POPULATION-BASED RESULTS

Appendix Table 12. RAXO baseline characteristics and outcomes in comparison with population-based data for Scandinavian, Dutch and Finnish cohorts.

| Reference                                  | RAXO study                       |                          | RAXO and Sorbye et al | Sorbye et al 2009 (data on file) | Sorbye et al (data on file) | Hamers et al. Int J Cancer 2020 | RAXO Tampere university hospital | RAXO Turku university hospital |
|--------------------------------------------|----------------------------------|--------------------------|-----------------------|----------------------------------|-----------------------------|---------------------------------|----------------------------------|--------------------------------|
| Population                                 | Real-world                       |                          | Real-world Population | Population                       | Population                  | Population                      | Population                       | Population                     |
| Unselected vs Selected population          | Unselected for treatable         |                          | Unselected            | Unselected                       | Unselected                  | Unselected                      | Unselected                       | Unselected                     |
| Single-site vs multisite metastases        | Multisite                        |                          | Multisite             | Yes                              | Multisite                   | Multisite                       | Multisite                        | Multisite                      |
| Prospective vs retrospective               | Prospective                      |                          | Prospective           |                                  | Prospective                 | Retrospective                   | Retrospective                    | Retrospective                  |
| Study name                                 | RAXO                             |                          | RAXO and PRCRC        | PRCRC                            | PRCRC BSC excluded          | Dutch population based          | Finnish population based         | Finnish population based       |
| Treatment arm or study population          | Resection, systemic BSC excluded | Resection, systemic, BSC | BSC only              | Resection, systemic, BSC         | Resection, systemic         | Resection, systemic, BSC        | Resection, systemic, BSC         | Resection, systemic, BSC       |
| Inclusion period                           | 2012-2018                        | 2012-2018                | 2003-2018             | 2003-2006                        | 2003-2006                   | 2008-2016                       | 2011-2018                        | 2011-2018                      |
| Number of patients                         | 1063                             | 1086                     | 316                   | 798                              | 503                         | 27,275                          | 866                              | 716                            |
| Target population                          | mCRC                             |                          | mCRC BSC              | All mCRC                         | Treatable mCRC              | Synchronous mCRC                | All mCRC                         | All mCRC                       |
| Age, median (range)                        | 66 (24-89)                       | 66 (24-90)               | 78 (40-97)            | 71 (22-97)                       | 65 (22-92)                  | 69 (··)                         | 70 (24-97)                       | 70 (28-94)                     |
| Elderly (>70 years if not noted otherwise) | 34 %                             | 34 %                     | 82 %                  | 53 %                             | 36 %                        | 49 %                            | 51 %                             | 48 %                           |
| Male gender                                | 61 %                             | 60 %                     | 49 %                  | 52 %                             | 55 %                        | 56 %                            | 56 %                             | 57 %                           |
| PS 0                                       | 28 %                             | 27 %                     | 5 %                   | 31 %                             | 46 %                        |                                 |                                  |                                |
| PS 1                                       | 57 %                             | 57 %                     | 24 %                  | 49 %                             | 39 %                        | 43 %                            |                                  |                                |
| PS 2-3                                     | 15 %                             | 16 %                     | 71 %                  | 20 %                             | 15 %                        | 9 %                             |                                  |                                |
| Single-site metastases                     | 48 %                             | 47 %                     | 30 %                  | 35 %                             | 36 %                        | 62 %                            |                                  |                                |
| Median number metastatic sites             | 2                                | 2                        | 2                     | 2                                | 2                           | 1                               |                                  |                                |
| Synchronous metastases                     | 67 %                             | 68 %                     | 61 %                  | 54 %                             | 52 %                        | 100 %                           | 63 %                             |                                |
| Liver metastases                           | 75 %                             | 75 %                     | 64 %                  | 65 %                             | 67 %                        | 75 %                            |                                  |                                |
| Liver only                                 | 34 %                             | 34 %                     | 15 %                  | 17 %                             | 18 %                        | 43 %                            |                                  |                                |
| Lung metastases                            | 30 %                             | 31 %                     | 27 %                  | 27 %                             | 28 %                        | 24 %                            |                                  |                                |
| Lung only                                  | 6 %                              | 6 %                      | 3 %                   | 4 %                              | 5 %                         | 5 %                             |                                  |                                |
| Lymph node metastases                      | 25 %                             | 25 %                     | 23 %                  | 27 %                             | 30 %                        |                                 |                                  |                                |
| Lymph nodes only                           | 3 %                              | 3 %                      | 2 %                   | 3 %                              | 4 %                         |                                 |                                  |                                |
| Peritoneal metastases                      | 16 %                             | 16 %                     | 21 %                  | 18 %                             | 17 %                        | 22 %                            |                                  |                                |
| Peritoneal only                            | 4 %                              | 4 %                      | 3 %                   | 2 %                              | 2 %                         | 9 %                             |                                  |                                |
| Ovarian                                    | 6 %                              | 6 %                      |                       |                                  |                             |                                 |                                  |                                |
| Ovarian-only                               | 0 %                              | 0 %                      |                       |                                  |                             |                                 |                                  |                                |
| Local relapse                              | 6 %                              | 6 %                      | 6 %                   | 5 %                              | 5 %                         |                                 |                                  |                                |
| Local relapse-only                         | 1 %                              | 1 %                      | 3 %                   | 1 %                              | 1 %                         |                                 |                                  |                                |
| Rectal primary tumour                      | 34 %                             | 34 %                     | 24 %                  | 32 %                             | 37 %                        | 28 %                            | 42 %                             | 38 %                           |
| Colon primary tumour                       | 66 %                             | 66 %                     | 76 %                  | 68 %                             | 63 %                        | 68 %                            | 58 %                             | 62 %                           |
| Right colon                                | 29 %                             | 29 %                     | 44 %                  | 36 %                             | 31 %                        | 35 %                            | 22 %                             | 31 %                           |
| Left colon                                 | 37 %                             | 37 %                     | 32 %                  | 31 %                             | 32 %                        | 33 %                            | 34 %                             | 24 %                           |
| Primary tumour resection                   | 62 %                             | 62 %                     | 63 %                  | 72 %                             | 76 %                        |                                 | 47 %                             |                                |
| Prior radiotherapy for primary tumour      | 13 %                             | 13 %                     | 7 %                   | 11 %                             | 13 %                        |                                 |                                  |                                |
| Prior adjuvant therapy for primary tumour  | 32 %                             | 32 %                     | 3 %                   | 11 %                             | 16 %                        |                                 |                                  |                                |
| KRAS / RAS wild-type (+/- BRAF wt)         | 41 %                             | 41 %                     | 37 %                  | 0 %                              | 41 %                        | 52 %                            |                                  |                                |
| RAS+BRAF wild-type                         | 29 %                             | 29 %                     | 35 %                  | 39 %                             | 41 %                        |                                 |                                  |                                |
| KRAS ± NRAS mutant                         | 51 %                             | 50 %                     | 41 %                  | 41 %                             | 40 %                        | 48 %                            |                                  |                                |
| BRAFV600E mutant                           | 8 %                              | 9 %                      | 22 %                  | 20 %                             | 19 %                        | 15 %                            |                                  |                                |
| Deficient mismatch repair                  | 4 %                              | 5 %                      |                       | 8 %                              |                             | 6 %                             |                                  |                                |
| Resectability rate upfront                 | 29 %                             | 28 %                     |                       |                                  |                             |                                 |                                  |                                |
| Response rate to systemic therapy          | 61 %                             | 59 %                     |                       | 39 %                             | 39 %                        |                                 |                                  |                                |
| Conversion rate                            | 13 %                             | 13 %                     |                       |                                  |                             |                                 |                                  |                                |
| Resection rate R0-1                        | 31 %                             | 30 %                     | 0 %                   | 6 %                              | 10 %                        |                                 |                                  |                                |
| Resection rate R0-2                        | 36 %                             | 35 %                     | 0 %                   |                                  |                             | 6-11%                           | 18 %                             | 8 % f                          |
| Local ablative therapy                     | 2 %                              | 2 %                      | 0 %                   |                                  |                             |                                 |                                  | 5 % f                          |
| Systemic therapy                           | 100 %                            | 98 %                     | 0 %                   | 52 %                             | 100 %                       | 56 %                            | 66 %                             | 55 %                           |
| Best supportive care                       | 0 %                              | 2 %                      | 100 %                 | 42 %                             | 0 %                         | 22 %                            | 31 %                             | 42 %                           |
| Pre-metastectomy chemotherapy              | 79 %                             | 74 %                     | 0 %                   |                                  |                             |                                 |                                  |                                |
| Post-metastectomy adjuvant therapy         | 81 %                             | 81 %                     | 0 %                   | 14 %                             | 14 %                        |                                 |                                  |                                |
| Perioperative therapy                      | 62 %                             | 62 %                     | 0 %                   |                                  |                             |                                 |                                  |                                |
| OS (months) all                            | 31 (IQR 16–64)                   | 30 (IQR 15–62)           | 3 (IQR 2–8)           | 10 (IQR 3–22)                    | 16 (IQR 9–32)               | 12 (IQR 3-25)*                  | 16 (IQR 5–41)                    | 16 (5–42)                      |
| OS (months) resected                       | 71 (IQR 39–141)                  | 71 (IQR 39–141)          |                       | 61 (IQR 34–·)                    | 61 (IQR 34–·)               | 48 (IQR 26–·)*                  | 65 (IQR 34–·)                    | 79 (IQR 35–·)                  |
| OS (months) systemic (only)                | 21 (IQR 12–34)                   | 21 (IQR 12–34)           |                       | 15 (IQR 8–27)                    | 15 (IQR 8–27)               | 15 (IQR 6–34)*                  | 22 (IQR 11–42)                   | 22 (IQR 11–42)                 |
| OS (months) BSC                            | ·                                | 3 (IQR 2–3)              | 3 (IQR 2–8)           | 3 (IQR 2–8)                      |                             | 2 (IQR 2-4)*                    | 3 (IQR 1–8)                      | 6 (IQR 1-20)¥                  |
| OS 1/3/5-year rate - resected              | 98/77/61%                        | 98/77/61%                |                       | 98/71/55%                        | 98/71/55%                   |                                 | 95/73/53%                        | 95/75/67%                      |
| OS 1/3/5-year rate all                     | 83/43/28%                        | 83/42/27%                | 15/2/1%               | 44/11/6%                         | 65/19/10%                   |                                 | 72/29/13%                        | 59/28/20%                      |
| PFS (months)                               | 13 (IQR 8–26)                    | 13 (IQR 7–25)            |                       | 11 (IQR 6–17)                    | 11 (IQR 6–17)               |                                 |                                  |                                |
| HR systemic therapy alone                  |                                  | Ref                      |                       | Ref                              | Ref                         |                                 | Ref                              | Ref                            |
| HR resection                               |                                  | 0.15 (0.12–0.19)         |                       | 0.25 (0.18–0.36)                 | 0.25 (0.18–0.36)            |                                 | 0.30 (0.24–0.39)                 | 0.24 (0.14–0.42)               |
| HR Local ablative therapy                  |                                  | 0.39 (0.29–0.53)         |                       |                                  |                             |                                 |                                  | 0.62 (0.39–0.98)               |
| HR BSC                                     |                                  | 14.2 (9.2–22.0)          |                       | 3.26 (2.80–3.80)                 | 3.26 (2.80–3.80)            |                                 | 6.17 (5.14–7.41)                 | 1.78 (1.50–2.12)¥              |

BSC = best supportive care, \* estimate from figures, ¥ non-verified data for BSC. f = liver and lung procedures. Sorbye et al<sup>29</sup>, Hamers et al<sup>36</sup>

**RESULTS – SURGERY AND SYSTEMIC THERAPY FOR ALL AND SINGLE METASTATIC SITES**

**Appendix Table 13. Metastatic sites during trajectory, systemic therapy and resections/LAT for all patients and per single-site metastases divided as liver, lung, peritoneal and other single-site.**

|                                           |                               | All patients |      | All single-site |      | Liver-limited |      | Lung-limited |      | Peritoneal-limited |      | Other single-site* |      |
|-------------------------------------------|-------------------------------|--------------|------|-----------------|------|---------------|------|--------------|------|--------------------|------|--------------------|------|
|                                           |                               | 1086         |      | 586             | 100% | 430           | 73%  | 66           | 11%  | 45                 | 8%   | 45                 | 8%   |
| <b>Metastatic sites during trajectory</b> |                               |              |      |                 |      |               |      |              |      |                    |      |                    |      |
| Metastatic sites                          | 1                             | 266          | 24%  | 266             | 45%  | 193           | 45%  | 36           | 55%  | 18                 | 40%  | 19                 | 42%  |
|                                           | 2                             | 322          | 30%  | 159             | 27%  | 120           | 28%  | 17           | 26%  | 10                 | 22%  | 12                 | 27%  |
|                                           | 3 to 9                        | 498          | 46%  | 161             | 28%  | 117           | 27%  | 13           | 20%  | 17                 | 38%  | 14                 | 31%  |
| New metastatic sites                      |                               |              |      |                 |      |               |      |              |      |                    |      |                    |      |
| Liver                                     | Trajectory                    | 867          | 80%  | 464             | 79%  | ..            | ..   | 12           | 18%  | 8                  | 18%  | 14                 | 31%  |
| Lung                                      | Trajectory                    | 571          | 53%  | 245             | 42%  | 162           | 38%  | ..           | ..   | 8                  | 18%  | 9                  | 20%  |
| Peritoneum                                | Trajectory                    | 280          | 26%  | 101             | 17%  | 50            | 12%  | 1            | 2%   | ..                 | ..   | 5                  | 11%  |
| Lymph nodes                               | Trajectory                    | 462          | 43%  | 158             | 27%  | 110           | 26%  | 5            | 8%   | 12                 | 27%  | 31                 | 69%  |
| Local relapse                             | Trajectory                    | 105          | 10%  | 33              | 6%   | 14            | 3%   | 4            | 6%   | 3                  | 7%   | 12                 | 27%  |
| 1-4 other sites                           | Trajectory                    | 136          | 13%  | 9               | 2%   | 76            | 18%  | 19           | 29%  | 15                 | 33%  | 16                 | 36%  |
| <b>Surgery and systemic therapy</b>       |                               |              |      |                 |      |               |      |              |      |                    |      |                    |      |
| Resection status                          | Resectable & R0-1 resected    | 230          | 21%  | 196             | 33%  | 157           | 60%  | 25           | 93%  | 8                  | 73%  | 6                  | 67%  |
|                                           | Resectable & R2 or LAT        | 35           | 3%   | 19              | 14%  | 15            | 6%   | 2            | 7%   | 2                  | 18%  | 0                  | 0%   |
|                                           | Converted & R0-1 resected     | 96           | 9%   | 82              | 3%   | 79            | 30%  | 0            | 0%   | 1                  | 9%   | 2                  | 22%  |
|                                           | Converted & R2 or LAT         | 38           | 3%   | 12              | 2%   | 11            | 4%   | 0            | 0%   | 0                  | 0%   | 1                  | 11%  |
|                                           | Not resected                  | 687          | 63%  | 277             | 47%  | 168           | 39%  | 39           | 59%  | 34                 | 76%  | 36                 | 80%  |
| First line therapy                        | Comb. CT & anti-EGFR          | 139          | 13%  | 87              | 15%  | 81            | 19%  | 4            | 6%   | 1                  | 2%   | 5                  | 11%  |
|                                           | Comb. CT & anti-VEGF          | 550          | 51%  | 283             | 48%  | 206           | 49%  | 29           | 45%  | 25                 | 57%  | 24                 | 55%  |
|                                           | Comb. CT (no biologic)        | 224          | 21%  | 132             | 23%  | 97            | 23%  | 20           | 31%  | 10                 | 23%  | 5                  | 11%  |
|                                           | Single CT +/- anti-VEGF/-EGFR | 147          | 14%  | 71              | 12%  | 37            | 9%   | 11           | 17%  | 8                  | 18%  | 10                 | 23%  |
|                                           | No systemic therapy           | 26           | 2%   | 13              | 2%   | 9             | 2%   | 2            | 3%   | 1                  | 2%   | 1                  | 2%   |
| First resection §                         | Conversion (+ adjuvant)       | 140 (87)     | 35%  | 103 (69)        | 22%  | 95 (64)       | 36%  | 4 (1)        | 15%  | 1 (1)              | 9%   | 3 (3)              | 33%  |
|                                           | Neoadjuvant (+ adjuvant)      | 157 (116)    | 39%  | 133 (105)       | 24%  | 119 (99)      | 45%  | 11 (6)       | 41%  | 1 (0)              | 9%   | 2 (0)              | 22%  |
|                                           | Adjuvant                      | 60           | 15%  | 24              | 19%  | 35            | 13%  | 10           | 37%  | 5                  | 46%  | 2                  | 22%  |
|                                           | Only resection                | 42           | 11%  | 21              | 35%  | 13            | 5%   | 2            | 7%   | 4                  | 36%  | 2                  | 22%  |
| Second resection ¶                        | Conversion (+ adjuvant)       | 44 (24)      | 28%  | 24 (15)         | 22%  | 19 (12)       | 21%  | 2 (1)        | 18%  | 3 (1)              | 50%  | 0                  | 0%   |
|                                           | Neoadjuvant (+ adjuvant)      | 33 (20)      | 21%  | 26 (15)         | 24%  | 25 (24)       | 28%  | 0            | 0%   | 1 (1)              | 17%  | 0                  | 0%   |
|                                           | Adjuvant                      | 28           | 18%  | 20              | 19%  | 14            | 16%  | 5            | 46%  | 1                  | 17%  | 0                  | 0%   |
|                                           | Only resection                | 50           | 32%  | 38              | 35%  | 32            | 36%  | 4            | 36%  | 1                  | 17%  | 1                  | 100% |
| Systemic therapy                          | Disease control intent        | 888          | 82%  | 426             | 73%  | 297           | 69%  | 52           | 79%  | 40                 | 89%  | 37                 | 82%  |
|                                           | Only curative treatment       | 175          | 16%  | 150             | 24%  | 126           | 29%  | 13           | 20%  | 4                  | 9%   | 7                  | 16%  |
|                                           | Best supportive care only     | 23           | 2%   | 10              | 2%   | 7             | 2%   | 1            | 2%   | 1                  | 2%   | 1                  | 2%   |
| Best response                             | CR/NED                        | 98           | 9%   | 78              | 13%  | 58            | 13%  | 9            | 14%  | 4                  | 9%   | 7                  | 16%  |
|                                           | PR                            | 555          | 51%  | 308             | 53%  | 241           | 56%  | 29           | 44%  | 12                 | 27%  | 26                 | 58%  |
|                                           | SD                            | 294          | 27%  | 144             | 25%  | 96            | 22%  | 24           | 36%  | 19                 | 42%  | 5                  | 11%  |
|                                           | PD                            | 126          | 12%  | 49              | 8%   | 31            | 7%   | 3            | 5%   | 9                  | 20%  | 6                  | 13%  |
|                                           | Not evaluated                 | 13           | 1%   | 7               | 1%   | 4             | 1%   | 1            | 2%   | 1                  | 2%   | 1                  | 2%   |
| Primary                                   | Never operated                | 253          | 23%  | 88              | 15%  | 66            | 15%  | 7            | 11%  | 11                 | 24%  | 4                  | 9%   |
|                                           | Upfront                       | 726          | 67%  | 429             | 73%  | 306           | 71%  | 55           | 83%  | 33                 | 73%  | 35                 | 78%  |
|                                           | During therapy                | 107          | 10%  | 69              | 12%  | 58            | 14%  | 4            | 6%   | 1                  | 2%   | 6                  | 13%  |
| Primary radicality #                      | R0                            | 763          | 92%  | 467             | 94%  | 347           | 95%  | 53           | 90%  | 28                 | 82%  | 39                 | 95%  |
|                                           | R1                            | 41           | 5%   | 20              | 4%   | 13            | 4%   | 4            | 7%   | 2                  | 6%   | 1                  | 2%   |
|                                           | R2                            | 29           | 3%   | 11              | 2%   | 4             | 1%   | 2            | 3%   | 4                  | 12%  | 1                  | 2%   |
| Number resections & LAT †                 | Cases with 1 procedure        | 254          | 63%  | 211             | 68%  | 181           | 69%  | 15           | 56%  | 5                  | 45%  | 8                  | 73%  |
|                                           | Cases with 2 procedures       | 95           | 24%  | 66              | 21%  | 57            | 22%  | 8            | 30%  | 2                  | 18%  | 1                  | 9%   |
|                                           | Cases with 3 to 11 procedures | 52           | 13%  | 33              | 11%  | 24            | 9%   | 4            | 15%  | 4                  | 36%  | 0                  | 0%   |
| Resection radicality ‡                    | R0                            | 336          | 81%  | 270             | 85%  | 231           | 87%  | 26           | 96%  | 6                  | 46%  | 7                  | 64%  |
|                                           | R1                            | 41           | 10%  | 27              | 9%   | 21            | 8%   | 1            | 4%   | 3                  | 23%  | 2                  | 18%  |
|                                           | R2                            | 36           | 9%   | 20              | 6%   | 14            | 5%   | 0            | 0%   | 4                  | 31%  | 2                  | 18%  |
| <b>Resections by metastatic site</b>      |                               |              |      |                 |      |               |      |              |      |                    |      |                    |      |
| Liver resection and/or LAT                | Number of cases               | 316          | 29%  | 263             | 45%  | 260           | 60%  | 1            | 2%   | 1                  | 2%   | 1                  | 0-3% |
|                                           | 1 procedure †                 | 243          | 77%  | 201             | 76%  | 199           | 77%  | 0            | 0%   | 1                  | 100% | 1                  | 100% |
|                                           | 2 procedures †                | 53           | 17%  | 45              | 17%  | 44            | 17%  | 1            | 100% | 0                  | 0%   | 0                  | 0%   |
|                                           | 3 to 5 procedures †           | 20           | 6%   | 17              | 6%   | 17            | 7%   | 0            | 0%   | 0                  | 0%   | 0                  | 0%   |
| Lung resection and/or LAT                 | Number of cases               | 81           | 7%   | 59              | 10%  | 32            | 7%   | 27           | 41%  | 0                  | 0%   | 0                  | 0%   |
|                                           | 1 procedure †                 | 62           | 77%  | 47              | 80%  | 27            | 84%  | 20           | 74%  | 0                  | 0%   | 0                  | 0%   |
|                                           | 2 to 9 procedures †           | 19           | 23%  | 12              | 20%  | 5             | 16%  | 7            | 26%  | 0                  | 0%   | 0                  | 0%   |
| Cytoreductive surgery +/- HIPEC           | Number of cases               | 48           | 4%   | 20              | 3%   | 8             | 2%   | 0            | 0%   | 11                 | 24%  | 1                  | 0-3% |
|                                           | 1 procedure †                 | 40           | 83%  | 15              | 75%  | 7             | 88%  | 0            | 0%   | 7                  | 64%  | 1                  | 100% |
|                                           | 2 procedures †                | 8            | 17%  | 5               | 25%  | 1             | 13%  | 0            | 0%   | 4                  | 36%  | 0                  | 0%   |
| Local relapse surgery                     | Number of cases               | 41           | 4%   | 12              | 2%   | 5             | 1%   | 2            | 3%   | 1                  | 2%   | 4                  | 1%   |
|                                           | 1 procedure †                 | 35           | 85%  | 10              | 83%  | 4             | 80%  | 1            | 50%  | 1                  | 100% | 4                  | 100% |
|                                           | 2 procedures †                | 6            | 15%  | 2               | 17%  | 1             | 20%  | 1            | 50%  | 0                  | 0%   | 0                  | 0%   |
| Distant lymphadenectomy                   | Number of cases               | 15           | 1%   | 8               | 1%   | 4             | 0-9% | 0            | 0%   | 1                  | 2%   | 3                  | 0-9% |
|                                           | 1 procedure †                 | 14           | 93%  | 7               | 88%  | 3             | 75%  | 0            | 0%   | 1                  | 100% | 3                  | 100% |
|                                           | 2 procedures †                | 1            | 7%   | 1               | 13%  | 1             | 25%  | 0            | 0%   | 0                  | 0%   | 0                  | 0%   |
| Gynaecologic resection                    | Number of cases               | 17           | 2%   | 4               | 1%   | 3             | 0-7% | 0            | 0%   | 1                  | 2%   | 0                  | 0%   |
|                                           | 1-2 procedures †              | 17           | 100% | 4               | 100% | 3             | 100% | 0            | 0%   | 1                  | 100% | 0                  | 0%   |
| Urologic resections                       | Number of cases               | 10           | 1%   | 4               | 1%   | 2             | 0-5% | 1            | 2%   | 1                  | 2%   | 0                  | 0%   |
|                                           | 1-2 procedures †              | 10           | 100% | 4               | 100% | 2             | 100% | 1            | 100% | 1                  | 100% | 0                  | 0%   |
| Subcutaneous or skin resections           | Number of cases               | 10           | 1%   | 3               | 1%   | 1             | 0-2% | 1            | 2%   | 1                  | 2%   | 0                  | 0%   |
|                                           | 1-3 procedures †              | 10           | 100% | 3               | 100% | 1             | 100% | 1            | 100% | 1                  | 100% | 0                  | 0%   |
| Palliative surgery                        | Number cases                  | 30           | 3%   | 18              | 3%   | 10            | 2%   | 3            | 5%   | 2                  | 4%   | 3                  | 7%   |

\* Other sites include intra-abdominal, distant bowel wall, kidney/ureter, gynaecologic, urologic, pleural, suprarenal, renal, pancreatic, thyroid, muscle and intravascular metastases.

Data are n (%) unless otherwise specified. § Proportions of total number of first resections and/or ablations. ¶ Proportions of total number of second resections and/or ablations. # Proportions of total number of surgeries of primary. † Proportions of total number of resections and/or LAT procedures.

HIPEC= hyperthermic intra-peritoneal chemotherapy.

**RESULTS – SURGERY AND SYSTEMIC THERAPY FOR MULTIPLE METASTATIC SITES**

**Appendix Table 14. Metastatic sites during disease trajectory, surgery, local ablative therapy, and systemic therapy by metastatic site in patients with multisite metastases at baseline according to liver & extrahepatic, lung & extrapulmonary, peritoneal & extraperitoneal and other multisite metastases.**

|                                           |                               | All multisite |      | Liver & extrahepatic |      | Lung & extrapulmonary |      | Peritoneal. & extraperitoneal |      | Other multiple |      |
|-------------------------------------------|-------------------------------|---------------|------|----------------------|------|-----------------------|------|-------------------------------|------|----------------|------|
|                                           |                               | 500           | 100% | 382                  | 100% | 264                   | 100% | 130                           | 100% | 346            | 100% |
| <b>Metastatic sites during trajectory</b> |                               |               |      |                      |      |                       |      |                               |      |                |      |
| Metastatic sites                          | 1                             |               |      | ..                   | ..   | ..                    | ..   | ..                            | ..   | ..             | ..   |
|                                           | 2                             | 163           | 33%  | 125                  | 33%  | 91                    | 34%  | 23                            | 18%  | 83             | 24%  |
|                                           | 3 to 9                        | 337           | 67%  | 257                  | 67%  | 173                   | 66%  | 107                           | 82%  | 263            | 76%  |
| New metastatic sites                      |                               |               |      |                      |      |                       |      |                               |      |                |      |
| Liver                                     | Trajectory                    | 403           | 81%  | ..                   | ..   | 223                   | 84%  | 83                            | 64%  | 251            | 73%  |
| Lung                                      | Trajectory                    | 326           | 65%  | 265                  | 69%  | ..                    | ..   | 57                            | 44%  | 189            | 55%  |
| Peritoneum                                | Trajectory                    | 179           | 36%  | 113                  | 30%  | 53                    | 20%  | ..                            | ..   | 131            | 38%  |
| Lymph nodes                               | Trajectory                    | 304           | 61%  | 222                  | 58%  | 141                   | 53%  | 70                            | 54%  | 272            | 79%  |
| Local relapse                             | Trajectory                    | 72            | 14%  | 36                   | 9%   | 19                    | 7%   | 23                            | 18%  | 67             | 19%  |
| 1-5 other sites                           | Trajectory                    | 127           | 25%  | 70                   | 18%  | 44                    | 17%  | 21                            | 16%  | 127            | 37%  |
| <b>Surgery and systemic therapy</b>       |                               |               |      |                      |      |                       |      |                               |      |                |      |
| Resection status                          | Resectable & R0-1 resected    | 34            | 7%   | 18                   | 5%   | 11                    | 4%   | 12                            | 9%   | 25             | 7%   |
|                                           | Resectable & R2 or LAT        | 16            | 3%   | 8                    | 2%   | 1                     | 0.4% | 5                             | 4%   | 12             | 3%   |
|                                           | Converted & R0-1 resected     | 14            | 3%   | 9                    | 2%   | 10                    | 4%   | 4                             | 3%   | 11             | 3%   |
|                                           | Converted & R2 or LAT         | 26            | 5%   | 21                   | 5%   | 15                    | 6%   | 6                             | 5%   | 17             | 5%   |
|                                           | Not resected                  | 410           | 82%  | 326                  | 85%  | 227                   | 86%  | 103                           | 79%  | 281            | 81%  |
| First line therapy                        | Comb. CT & anti-EGFR          | 52            | 10%  | 169                  | 44%  | 28                    | 11%  | 9                             | 7%   | 40             | 12%  |
|                                           | Comb. CT & anti-VEGF          | 267           | 53%  | 92                   | 24%  | 146                   | 55%  | 68                            | 52%  | 186            | 54%  |
|                                           | Comb. CT (no biologic)        | 92            | 18%  | 51                   | 13%  | 49                    | 19%  | 27                            | 21%  | 59             | 17%  |
|                                           | Single CT +/- anti-VEGF/-EGFR | 76            | 15%  | 26                   | 7%   | 34                    | 13%  | 23                            | 18%  | 52             | 15%  |
|                                           | No systemic therapy           | 13            | 3%   | 44                   | 12%  | 7                     | 3%   | 3                             | 2%   | 9              | 3%   |
| First resection §                         | Conversion (+ adjuvant)       | 37 (18)       | 41%  | 27 (12)              | 48%  | 18 (7)                | 49%  | 8 (5)                         | 53%  | 12 (11)        | 36%  |
|                                           | Neoadjuvant (+ adjuvant)      | 24 (11)       | 27%  | 19 (9)               | 34%  | 15 (6)                | 41%  | 3 (2)                         | 20%  | 13 (6)         | 39%  |
|                                           | Adjuvant                      | 8             | 9%   | 1                    | 2%   | 1                     | 3%   | 4                             | 27%  | 8              | 24%  |
|                                           | Only resection                | 21            | 23%  | 9                    | 16%  | 3                     | 8%   | 0                             | 0%   | 0              | 0%   |
| Second resection ¶                        | Conversion (+ adjuvant)       | 20 (9)        | 43%  | 13 (7)               | 46%  | 5                     | 31%  | 5 (2)                         | 42%  | 17 (8)         | 63%  |
|                                           | Neoadjuvant (+ adjuvant)      | 7 (5)         | 15%  | 5 (3)                | 18%  | 3                     | 19%  | 3 (3)                         | 25%  | 6 (5)          | 22%  |
|                                           | Adjuvant                      | 8             | 17%  | 1                    | 4%   | 3                     | 19%  | 4                             | 33%  | 4              | 15%  |
|                                           | Only resection                | 12            | 26%  | 9                    | 32%  | 5                     | 31%  | 0                             | 0%   | 0              | 0%   |
| Systemic therapy                          | Disease control intent        | 462           | 92%  | 354                  | 93%  | 247                   | 94%  | 119                           | 92%  | 321            | 93%  |
|                                           | Only curative treatment       | 25            | 5%   | 15                   | 4%   | 10                    | 4%   | 8                             | 6%   | 16             | 5%   |
|                                           | Best supportive care only     | 13            | 3%   | 13                   | 3%   | 7                     | 3%   | 3                             | 2%   | 9              | 3%   |
| Best response                             | CR/NED                        | 20            | 4%   | 9                    | 2%   | 5                     | 2%   | 8                             | 6%   | 5              | 1%   |
|                                           | PR                            | 173           | 35%  | 197                  | 52%  | 130                   | 49%  | 52                            | 40%  | 19             | 5%   |
|                                           | SD                            | 150           | 30%  | 109                  | 29%  | 87                    | 33%  | 36                            | 28%  | 169            | 49%  |
|                                           | PD                            | 77            | 15%  | 61                   | 16%  | 38                    | 14%  | 28                            | 22%  | 103            | 30%  |
|                                           | Not evaluated                 | 6             | 1%   | 6                    | 2%   | 4                     | 2%   | 2                             | 2%   | 50             | 14%  |
| Primary surgery                           | Never operated                | 165           | 33%  | 152                  | 40%  | 102                   | 39%  | 33                            | 25%  | 106            | 31%  |
|                                           | Upfront                       | 297           | 59%  | 196                  | 51%  | 143                   | 54%  | 93                            | 72%  | 217            | 63%  |
|                                           | During therapy                | 38            | 8%   | 34                   | 9%   | 19                    | 7%   | 4                             | 3%   | 23             | 7%   |
| Primary radicality #                      | R0                            | 296           | 88%  | 208                  | 90%  | 148                   | 91%  | 77                            | 79%  | 211            | 88%  |
|                                           | R1                            | 21            | 6%   | 13                   | 6%   | 9                     | 6%   | 8                             | 8%   | 16             | 7%   |
|                                           | R2                            | 18            | 5%   | 9                    | 4%   | 5                     | 3%   | 12                            | 12%  | 13             | 6%   |
| Number resections & LAT                   | 1                             | 42            | 47%  | 26                   | 46%  | 20                    | 54%  | 11                            | 41%  | 30             | 46%  |
|                                           | 2                             | 29            | 32%  | 17                   | 30%  | 9                     | 24%  | 10                            | 37%  | 23             | 35%  |
|                                           | 3 to 11                       | 19            | 21%  | 13                   | 23%  | 8                     | 22%  | 6                             | 22%  | 12             | 18%  |
| Resection radicality †                    | R0                            | 65            | 72%  | 48                   | 86%  | 30                    | 81%  | 11                            | 41%  | 42             | 65%  |
|                                           | R1                            | 14            | 16%  | 4                    | 7%   | 4                     | 11%  | 8                             | 30%  | 13             | 20%  |
|                                           | R2                            | 11            | 12%  | 4                    | 7%   | 3                     | 8%   | 8                             | 30%  | 10             | 15%  |
| <b>Resections by metastatic site</b>      |                               |               |      |                      |      |                       |      |                               |      |                |      |
| Liver resection and/or LAT                | Number of cases               | 53            | 11%  | 50                   | 13%  | 30                    | 11%  | 5                             | 4%   | 28             | 8%   |
|                                           | 1 procedure †                 | 42            | 79%  | 40                   | 80%  | 27                    | 90%  | 3                             | 60%  | 18             | 64%  |
|                                           | 2 procedures †                | 8             | 15%  | 8                    | 16%  | 3                     | 10%  | 1                             | 20%  | 7              | 25%  |
|                                           | 3 to 5 procedures †           | 3             | 6%   | 2                    | 4%   | 0                     | 0%   | 1                             | 20%  | 3              | 11%  |
| Lung resection and/or LAT                 | Number of cases               | 22            | 4%   | 15                   | 4%   | 19                    | 7%   | 5                             | 4%   | 10             | 3%   |
|                                           | 1 procedure †                 | 15            | 68%  | 9                    | 60%  | 12                    | 63%  | 4                             | 80%  | 7              | 70%  |
|                                           | 2 to 8 procedures †           | 7             | 32%  | 6                    | 40%  | 7                     | 37%  | 1                             | 20%  | 3              | 30%  |
| Cytoreductive sugery +/- HIPEC            | Number of cases               | 28            | 6%   | 6                    | 2%   | 4                     | 2%   | 23                            | 18%  | 27             | 8%   |
|                                           | 1 procedure †                 | 25            | 89%  | 6                    | 100% | 4                     | 100% | 20                            | 87%  | 24             | 89%  |
|                                           | 2 procedures †                | 3             | 11%  | 0                    | 0%   | 0                     | 0%   | 3                             | 13%  | 3              | 11%  |
| Local relapse surgery                     | Number of cases               | 29            | 6%   | 12                   | 3%   | 2                     | 0.8% | 14                            | 11%  | 29             | 8%   |
|                                           | 1 procedure †                 | 25            | 86%  | 11                   | 92%  | 2                     | 100% | 14                            | 100% | 25             | 86%  |
|                                           | 2 procedures †                | 4             | 14%  | 1                    | 8%   | 0                     | 0%   | 0                             | 0%   | 4              | 14%  |
| Distant lymphadenectomy                   | Number of cases               | 7             | 1%   | 4                    | 1%   | 3                     | 1%   | 2                             | 2%   | 5              | 1%   |
|                                           | 1 procedure †                 | 7             | 100% | 4                    | 100% | 3                     | 100% | 2                             | 100% | 5              | 100% |
|                                           | 2 procedures †                | 0             | 0%   | 0                    | 0%   | 0                     | 0%   | 0                             | 0%   | 0              | 0%   |
| Gynecologic resection                     | Number of cases               | 13            | 3%   | 6                    | 2%   | 2                     | 0.8% | 8                             | 6%   | 13             | 4%   |
|                                           | 1-2 procedures †              | 13            | 100% | 6                    | 100% | 2                     | 100% | 8                             | 100% | 13             | 100% |
| Urologic resections                       | Number of cases               | 6             | 1%   | 4                    | 1%   | 0                     | 0%   | 1                             | 0.8% | 6              | 2%   |
|                                           | 1-2 procedures †              | 6             | 100% | 4                    | 100% | 0                     | 0%   | 1                             | 100% | 6              | 100% |
| Subcutaneous or skin resections           | Number of cases               | 7             | 1%   | 3                    | 0.8% | 0                     | 0%   | 3                             | 2%   | 5              | 1%   |
|                                           | 1 to 3 procedures †           | 7             | 100% | 3                    | 100% | 0                     | 0%   | 3                             | 100% | 5              | 100% |
| Palliative surgery                        | Number of cases               | 12            | 2%   | 8                    | 2%   | 1                     | 0.4% | 5                             | 4%   | 10             | 3%   |

\* Other sites include intra-abdominal, distant bowel wall, kidney/ureter, gynaecologic, urologic, pleural, suprarenal, renal, pancreatic, thyroid, muscle and intravascular metastases.

Patients are recorded recorded in multiple categories. Data are n (%) unless otherwise specified. § Proportions of total number of first resections and/or ablations. ¶ Proportions of total number of second resections and/or ablations. # Proportions of total number of surgeries of primary. † Proportions of total number of resections and/or LAT procedures.

HIPEC= hyperthermic intra-peritoneal chemotherapy. LAT= local ablative therapy. Perit. = peritoneal

**RESULTS – SAFETY OF RESECTION AND/OR LAT**

**Appendix Table 15. Morbidity at 8 weeks and 30-day mortality from resection and/or local ablative therapy (LAT)**

|                                              |           | Total |      |
|----------------------------------------------|-----------|-------|------|
|                                              |           | 660   | 100% |
| Any complication                             | No        | 445   | 67%  |
|                                              | Yes       | 215   | 33%  |
| Postoperative bleeding                       | No        | 651   | 99%  |
|                                              | Yes       | 9     | 1%   |
| Wound complication                           | No        | 605   | 92%  |
|                                              | Yes       | 55    | 8%   |
| Postoperative infection                      | No        | 523   | 79%  |
|                                              | Confirmed | 105   | 16%  |
|                                              | Suspected | 32    | 5%   |
| Other complication                           | No        | 600   | 91%  |
|                                              | Yes       | 60    | 9%   |
| 30-day mortality after each metastasectomy * | No        | 658   | 100% |
|                                              | Yes       | 2     | 0.3% |

\* 2 of 399 (0.5%) died of massive bleeding, one at liver resection and the second during lymphadenectomy.

**RESULTS – SAFETY OF FIRST-LINE SYSTEMIC THERAPY**

**Appendix Table 16. Worst grade of most common (>5%) adverse event groups associated with chemotherapy, with or without biologics\***

|                       |            | All systemic |       | R0-1 resection |       | R2 or LAT |       | “Systemic therapy alone” |       |
|-----------------------|------------|--------------|-------|----------------|-------|-----------|-------|--------------------------|-------|
|                       |            | 1060         | 100 % | 324            | 100 % | 72        | 100 % | 664                      | 100 % |
| Worst toxicity        | Gr 3-4     | 681          | 64 %  | 192            | 59 %  | 49        | 68 %  | 440                      | 66 %  |
| Nausea or vomiting    | Gr 3-4     | 64           | 6 %   | 15             | 5 %   | 5         | 7 %   | 44                       | 7 %   |
| Diarrhoea             | Gr 3-4     | 84           | 8 %   | 16             | 5 %   | 6         | 8 %   | 62                       | 9 %   |
| Skin§                 | Gr 3-4     | 48           | 5 %   | 12             | 4 %   | 3         | 4 %   | 33                       | 5 %   |
| Infections            | Gr 3-4 (5) | 285 (5)      | 27 %  | 61             | 19 %  | 21        | 29 %  | 203 (5)                  | 31 %  |
| Thromboembolic event  | Gr 3-4 (5) | 79 (1)       | 8 %   | 20             | 6 %   | 5         | 7 %   | 54 (1)                   | 8 %   |
| Leukocytopenia        | Gr 3-4     | 72           | 7 %   | 20             | 6 %   | 2         | 3 %   | 50                       | 8 %   |
| Transaminase elevated | Gr 3-4     | 62           | 6 %   | 37             | 11 %  | 9         | 13 %  | 16                       | 2 %   |

\*Patients were divided into three groups: curative resection (R0-1), R2 resection of metastases or primary, Local Ablative Therapy (LAT) or not all tumour sites resected curatively (R2/LAT); “systemic therapy alone” group.

Excluded are 23 patients with best supportive care and 3 patients with metastasectomy without systemic therapy.

§ mostly palmoplantar erythrodysesthesia, acneiform rash, and paronychia.

Additional grade 5 toxicities: cardiac events (n=1 in R2/LAT and n=1 in “systemic therapy alone” group), and allergic reaction (n=1 in “systemic therapy alone” group).

## REFERENCES

1. Kanas GP, Taylor A, Primrose JN, et al. Survival after liver resection in metastatic colorectal cancer: review and meta-analysis of prognostic factors. *Clin Epidemiol* 2012; **4**: 283-301.
2. Robertson DJ, Stukel TA, Gottlieb DJ, Sutherland JM, Fisher ES. Survival after hepatic resection of colorectal cancer metastases: a national experience. *Cancer* 2009; **115**(4): 752-9.
3. Folprecht G, Grothey A, Alberts S, Raab HR, Köhne CH. Neoadjuvant treatment of unresectable colorectal liver metastases: correlation between tumour response and resection rates. *Ann Oncol* 2005; **16**(8): 1311-9.
4. Sjøvall A, Jarv V, Blomqvist L, et al. The potential for improved outcome in patients with hepatic metastases from colon cancer: a population-based study. *Eur J Surg Oncol* 2004; **30**(8): 834-41.
5. Norén A, Eriksson HG, Olsson LI. Selection for surgery and survival of synchronous colorectal liver metastases; a nationwide study. *Eur J Cancer* 2016; **53**: 105-14.
6. Scherman P, Syk I, Holmberg E, Naredi P, Rizell M. Influence of primary tumour and patient factors on survival in patients undergoing curative resection and treatment for liver metastases from colorectal cancer. *BJS Open* 2020; **4**(1): 118-32.
7. Angelsen JH, Horn A, Sorbye H, Eide GE, Loes IM, Viste A. Population-based study on resection rates and survival in patients with colorectal liver metastasis in Norway. *Br J Surg* 2017; **104**(5): 580-9.
8. Booth CM, Nanji S, Wei X, Biagi JJ, Krzyzanowska MK, Mackillop WJ. Surgical resection and peri-operative chemotherapy for colorectal cancer liver metastases: A population-based study. *Eur J Surg Oncol* 2016; **42**(2): 281-7.
9. Scheele J, Stangl R, Altendorf-Hofmann A. Hepatic metastases from colorectal carcinoma: impact of surgical resection on the natural history. *Br J Surg* 1990; **77**(11): 1241-6.
10. Hackl C, Neumann P, Gerken M, Loss M, Klinkhammer-Schalke M, Schlitt HJ. Treatment of colorectal liver metastases in Germany: a ten-year population-based analysis of 5772 cases of primary colorectal adenocarcinoma. *BMC Cancer* 2014; **14**: 810.
11. Tampellini M, Ottone A, Bellini E, et al. The role of lung metastasis resection in improving outcome of colorectal cancer patients: results from a large retrospective study. *Oncologist* 2012; **17**(11): 1430-8.
12. Li WH, Peng JJ, Xiang JQ, Chen W, Cai SJ, Zhang W. Oncological outcome of unresectable lung metastases without extrapulmonary metastases in colorectal cancer. *World J Gastroenterol* 2010; **16**(26): 3318-24.
13. Guerrero F, Mossetti C, Ceccarelli M, et al. Surgery of colorectal cancer lung metastases: analysis of survival, recurrence and re-surgery. *J Thorac Dis* 2016; **8**(7): 1764-71.
14. Booth CM, Nanji S, Wei X, Mackillop WJ. Outcomes of Resected Colorectal Cancer Lung Metastases in Routine Clinical Practice: A Population-Based Study. *Ann Surg Oncol* 2016; **23**(4): 1057-63.
15. Isom C, Idrees K, Wang L, Tan M, Parikh AA, Bailey CE. Resection of isolated distant nodal metastasis in metastatic colorectal cancer. *Surgical Oncology* 2020; **33**: 58-62.
16. Kyang LS, Alzahrani NA, Valle SJ, et al. Long-term survival outcomes of cytoreductive surgery and perioperative intraperitoneal chemotherapy: Single-institutional experience with 1225 cases. *J Surg Oncol* 2019; **120**(4): 794-802.
17. Al-Busaidi IS, Bailey T, Dobbs B, Eglinton TW, Wakeman CJ, Frizelle FA. Complete resection of colorectal cancer with ovarian metastases combined with chemotherapy is associated with improved survival. *ANZ J Surg* 2019; **89**(9): 1091-6.
18. Ursem C, Zhou M, Paciorek A, et al. Clinicopathologic Characteristics and Impact of Oophorectomy for Ovarian Metastases from Colorectal Cancer. *Oncologist* 2020; **25**(7): 564-71.
19. Ikoma N, You YN, Bednarski BK, et al. Impact of Recurrence and Salvage Surgery on Survival After Multidisciplinary Treatment of Rectal Cancer. *J Clin Oncol* 2017; **35**(23): 2631-8.
20. Yun JA, Huh JW, Kim HC, et al. Local recurrence after curative resection for rectal carcinoma: The role of surgical resection. *Medicine* 2016; **95**(27): e3942.
21. Sorbye H, Köhne C-H, Sargent DJ, Glimelius B. Patient characteristics and stratification in medical treatment studies for metastatic colorectal cancer: A proposal for standardization of patient characteristic reporting and stratification. *Ann Oncol* 2007; **18**(10): 1666-72.
22. Folprecht G, Gruenberger T, Bechstein WO, et al. Tumour response and secondary resectability of colorectal liver metastases following neoadjuvant chemotherapy with cetuximab: the CELIM randomised phase 2 trial. *Lancet Oncol* 2010; **11**(1): 38-47.
23. Gruenberger T, Bridgewater J, Chau I, et al. Bevacizumab plus mFOLFOX-6 or FOLFOXIRI in patients with initially unresectable liver metastases from colorectal cancer: the OLIVIA multinational randomised phase II trial. *Ann Oncol* 2015; **26**(4): 702-8.
24. Cremolini C, Loupakis F, Antoniotti C, et al. FOLFOXIRI plus bevacizumab versus FOLFIRI plus bevacizumab as first-line treatment of patients with metastatic colorectal cancer: updated overall survival and molecular subgroup analyses of the open-label, phase 3 TRIBE study. *Lancet Oncol* 2015; **16**(13): 1306-15.
25. Douillard JY, Siena S, Peeters M, Koukakis R, Terwey JH, Tabernero J. Impact of early tumour shrinkage and resection on outcomes in patients with wild-type RAS metastatic colorectal cancer. *Eur J Cancer* 2015; **51**(10): 1231-42.
26. Venook AP, Niedzwiecki D, Lenz HJ, et al. Effect of First-Line Chemotherapy Combined With Cetuximab or Bevacizumab on Overall Survival in Patients With KRAS Wild-Type Advanced or Metastatic Colorectal Cancer: A Randomized Clinical Trial. *JAMA* 2017; **317**(23): 2392-401.
27. Stintzing S, Modest DP, Rossius L, et al. FOLFIRI plus cetuximab versus FOLFIRI plus bevacizumab for metastatic colorectal cancer (FIRE-3): a post-hoc analysis of tumour dynamics in the final RAS wild-type subgroup of this randomised open-label phase 3 trial. *Lancet Oncol* 2016; **17**(10): 1426-34.
28. Heinemann V, von Weikersthal LF, Decker T, et al. FOLFIRI plus cetuximab versus FOLFIRI plus bevacizumab as first-line treatment for patients with metastatic colorectal cancer (FIRE-3): a randomised, open-label, phase 3 trial. *Lancet Oncol* 2014; **15**(10): 1065-75.
29. Sorbye H, Pfeiffer P, Cavalli-Bjorkman N, et al. Clinical trial enrollment, patient characteristics, and survival differences in prospectively registered metastatic colorectal cancer patients. *Cancer* 2009; **115**(20): 4679-87.
30. Van Cutsem E, Cervantes A, Adam R, et al. ESMO consensus guidelines for the management of patients with metastatic colorectal cancer. *Ann Oncol* 2016; **27**(8): 1386-422.
31. Benson AB, Venook A. NCCN guidelines for rectal cancer. *National Comprehensive Cancer Network Guidelines*, 25.6.2020, 2020. (accessed 05.09.2020).
32. Benson A, Venook A. NCCN guidelines for colon cancer. *National Comprehensive Cancer Network Guidelines*, 15.6.2020, 2020. (accessed 05.09.2020).
33. Yoshino T, Arnold D, Taniguchi H, et al. Pan-Asian adapted ESMO consensus guidelines for the management of patients with metastatic colorectal cancer: a JSMO-ESMO initiative endorsed by CSCO, KACO, MOS, SSO and TOS. *Ann Oncol* 2018; **29**(1): 44-70.
34. Nordlinger B, Sorbye H, Glimelius B, et al. Perioperative FOLFOX4 chemotherapy and surgery versus surgery alone for resectable liver metastases from colorectal cancer (EORTC 40983): long-term results of a randomised, controlled, phase 3 trial. *Lancet Oncol* 2013; **14**(12): 1208-15.
35. Goey KKH, Sørbye H, Glimelius B, et al. Consensus statement on essential patient characteristics in systemic treatment trials for metastatic colorectal cancer: Supported by the ARCAD Group. *Eur J Cancer* 2018; **100**: 35-45.
36. Hamers PAH, Elferink MAG, Stellato RK, et al. Informing metastatic colorectal cancer patients by quantifying multiple scenarios for survival time based on real-life data. *Int J Cancer* 2021; **148**(2): 296-306.

# STUDY PROTOCOL

## RAXO trial

**A population-based prospective study to evaluate clinical behaviour, resectability and survival in metastatic colorectal cancer patients in Finland**

Date of Protocol: 29.8.2011\_FINAL  
3.12.2015\_Version\_2.0  
30.10.2016\_Version\_3.1  
07.05.2017\_Version\_3.2

## SUMMARY

|                               |                                                                                                                                                                                                                                                                                                                                                                                                                                                                                                                                                                                                                                                                                                                                                                                                                                                                                                                                                                                                                                                                                                                                                                                                                                                                                                                                        |
|-------------------------------|----------------------------------------------------------------------------------------------------------------------------------------------------------------------------------------------------------------------------------------------------------------------------------------------------------------------------------------------------------------------------------------------------------------------------------------------------------------------------------------------------------------------------------------------------------------------------------------------------------------------------------------------------------------------------------------------------------------------------------------------------------------------------------------------------------------------------------------------------------------------------------------------------------------------------------------------------------------------------------------------------------------------------------------------------------------------------------------------------------------------------------------------------------------------------------------------------------------------------------------------------------------------------------------------------------------------------------------|
| <b>Protocol title:</b>        | A population-based prospective study to evaluate clinical behaviour, resectability and survival in 1st line metastatic colorectal cancer (CRC) patients in Finland<br><br>The RAXO trial                                                                                                                                                                                                                                                                                                                                                                                                                                                                                                                                                                                                                                                                                                                                                                                                                                                                                                                                                                                                                                                                                                                                               |
| <b>Protocol version:</b>      | <u>07.05.2017 Version 3.2</u>                                                                                                                                                                                                                                                                                                                                                                                                                                                                                                                                                                                                                                                                                                                                                                                                                                                                                                                                                                                                                                                                                                                                                                                                                                                                                                          |
| <b>Principal Investigator</b> | Pia Österlund; MD, PhD; associate professor<br>Helena Isoniemi; MD, PhD; professor                                                                                                                                                                                                                                                                                                                                                                                                                                                                                                                                                                                                                                                                                                                                                                                                                                                                                                                                                                                                                                                                                                                                                                                                                                                     |
| <b>Study Sponsor</b>          | Academic sponsorship                                                                                                                                                                                                                                                                                                                                                                                                                                                                                                                                                                                                                                                                                                                                                                                                                                                                                                                                                                                                                                                                                                                                                                                                                                                                                                                   |
| <b>EudraCT number</b>         | 2011-003158-24                                                                                                                                                                                                                                                                                                                                                                                                                                                                                                                                                                                                                                                                                                                                                                                                                                                                                                                                                                                                                                                                                                                                                                                                                                                                                                                         |
| <b>Project phase</b>          | 1) Prospective clinical trial and<br>2) Data collection trial                                                                                                                                                                                                                                                                                                                                                                                                                                                                                                                                                                                                                                                                                                                                                                                                                                                                                                                                                                                                                                                                                                                                                                                                                                                                          |
| <b>Indication</b>             | Metastatic cancer of the colon or rectum                                                                                                                                                                                                                                                                                                                                                                                                                                                                                                                                                                                                                                                                                                                                                                                                                                                                                                                                                                                                                                                                                                                                                                                                                                                                                               |
| <b>Objectives</b>             | <p>Primary objective:</p> <ul style="list-style-type: none"> <li>To assess clinical behaviour of metastatic colorectal cancer and overall resectability, postoperative morbidity and outcomes after resection</li> </ul> <p>Secondary objectives:</p> <ul style="list-style-type: none"> <li>To assess treatments for mCRC</li> <li>To assess efficacy of chemotherapy and targeted drugs with overall response rates (ORR), failure free survival (FFS), progression free survival (PFS) and overall survival (OS)</li> <li>To radiologically assess tumour density and morphology and assess alternative radiologic response evaluation in comparison with RECIST response criteria</li> <li>To evaluate whole blood, plasma, serum and tumour block biomarkers and DNA polymorphisms that may predict drug effects, resectability and clinical behaviour of the tumour in the prospective cohort.</li> <li>Biomarker evaluation from diagnostic samples, mainly tumour blocks, in the retrospective data collection trial in order to verify diagnosis and predictive &amp; prognostic markers (from prospective clinical trial) in a big population based series.</li> <li>Quality of life and health related quality of life, Cost-utility, QALY and cost-benefit assessment in the subpopulation of 100-200 patients.</li> </ul> |
| <b>Planned sample size</b>    | In total 1000 patients will be recruited in the clinical trial part of the study. Recruitment to the clinical trial will be between November 2011 and December 2018. Population based assessment in the data collection trial during the time period of recruitment to the clinical trial.                                                                                                                                                                                                                                                                                                                                                                                                                                                                                                                                                                                                                                                                                                                                                                                                                                                                                                                                                                                                                                             |
| <b>No. of centres</b>         | All hospitals treating colorectal cancer in Finland (appr. 20)                                                                                                                                                                                                                                                                                                                                                                                                                                                                                                                                                                                                                                                                                                                                                                                                                                                                                                                                                                                                                                                                                                                                                                                                                                                                         |



|                                   |                                                                                                                                                                                                                                                                                                                                                                                                                                                                                                                                                                                                                                                                                                                                                                                                                                                                                                                  |
|-----------------------------------|------------------------------------------------------------------------------------------------------------------------------------------------------------------------------------------------------------------------------------------------------------------------------------------------------------------------------------------------------------------------------------------------------------------------------------------------------------------------------------------------------------------------------------------------------------------------------------------------------------------------------------------------------------------------------------------------------------------------------------------------------------------------------------------------------------------------------------------------------------------------------------------------------------------|
| <b>Selection criteria</b>         | <b>Inclusion criteria</b> <ol style="list-style-type: none"> <li>1. Patients with histologically confirmed CRC, who are scheduled to start or are getting first line chemotherapy for metastatic disease</li> <li>2. Age <math>\geq</math> 18</li> <li>3. Metastatic disease (including locally advanced disease not amenable with surgery and/or (chemo)radiotherapy)</li> <li>4. Signed written informed consent according to ICH/GCP and the local regulations (approved by the Independent Ethics Committee [IEC]) will be obtained prior to study</li> <li>5. No informed consent will be obtained from patients participating in the data collection study obtaining data from hospital charts. No blood sampling, nor contacting of patients will be performed.</li> </ol>                                                                                                                                |
| <b>Resectability</b>              | Patients will be centrally assessed for resectability at baseline and thereafter for a maximum of 3 times (mainly for liver and lung metastasectomies) every 8-12 weeks.                                                                                                                                                                                                                                                                                                                                                                                                                                                                                                                                                                                                                                                                                                                                         |
| <b>Standard medical treatment</b> | In each clinic standard medical treatment will be administered until disease progression, unless unacceptable drugtoxicity is experienced or until resectability is achieved. At least 3 months of the same chemotherapy treatment should be given at the physicians discretion following metastasectomy.                                                                                                                                                                                                                                                                                                                                                                                                                                                                                                                                                                                                        |
| <b>Study procedures</b>           | <b>Informed consent:</b><br>Separate written informed consent must be obtained before the patient participates in the prospective resectability evaluation study or in the blood sampling for biomarkers.<br><br><b>Screening:</b><br>Baseline screening includes following assessments: <ul style="list-style-type: none"> <li>• According to local standard practice: <ul style="list-style-type: none"> <li>- Demographic data, medical history, cancer/treatment history and concomitant medications</li> <li>- ECOG performance status and physical examination</li> <li>- Tumour assessments i.e. whole body CT (in combination with MRI and PET according to subprotocols or local standards) before treatment starts</li> <li>- Central assessment of resectability initiated</li> <li>- Whole blood for DNA, plasma and serum at the baseline</li> <li>- Tumour blocks collected</li> </ul> </li> </ul> |

|                                   |                                                                                                                                                                                                                                                                                                                                                                                                                                                                                                                                                                                                                                                                                                                                                                                                                                                                                                                                                                                                                                                                                                                                                                                                                                                                   |
|-----------------------------------|-------------------------------------------------------------------------------------------------------------------------------------------------------------------------------------------------------------------------------------------------------------------------------------------------------------------------------------------------------------------------------------------------------------------------------------------------------------------------------------------------------------------------------------------------------------------------------------------------------------------------------------------------------------------------------------------------------------------------------------------------------------------------------------------------------------------------------------------------------------------------------------------------------------------------------------------------------------------------------------------------------------------------------------------------------------------------------------------------------------------------------------------------------------------------------------------------------------------------------------------------------------------|
|                                   | <p><u>The following data will be collected during treatment:</u></p> <ul style="list-style-type: none"> <li>• According to local standard practice: <ul style="list-style-type: none"> <li>- Spontaneous adverse event reporting according to local regulations, without data collection for the study purposes</li> <li>- Monitoring of concomitant diseases, treatments, medications and compliance to drugs</li> <li>- Physical examination</li> <li>- Assessments of tumour response using whole-body CT (or MRI/PET according to subprotocols)</li> <li>- Confirmation of overall response</li> </ul> </li> <li>• Resectability will be assessed centrally after baseline for a maximum of 3 times every 8-12 weeks during the treatment</li> <li>• Plasma and serum will be collected at the same time as tumour assessment and after last chemotherapy cycle</li> </ul> <p><u>The following data will be collected during follow-up:</u></p> <ul style="list-style-type: none"> <li>• According to local standard practice: <ul style="list-style-type: none"> <li>- Assessments of tumour response</li> <li>- Subsequent treatments</li> <li>- Spontaneous adverse event reporting, without data collection for the study purposes</li> </ul> </li> </ul> |
| <b>Data collection procedures</b> | <p>In addition to the 1000 consenting patients participating in the clinical study; the data collection cohort will gather population based information from the cancer registry and from hospital charts for metastatic colorectal cancer patients. Similar inclusion criteria will be used, but no blood sampling or patient contacting will be performed. Inclusion period will be identical with the clinical study.</p>                                                                                                                                                                                                                                                                                                                                                                                                                                                                                                                                                                                                                                                                                                                                                                                                                                      |
| <b>Statistical considerations</b> | <p>The primary objective is to assess clinical behaviour of mCRC and the overall resectability rate, postoperative morbidity and outcomes after resection, compared between chemotherapy regimens. The secondary objectives, i.e. treatments, RR, FFS, PFS, and OS will also be assessed overall and compared between chemotherapy regimens.</p> <p>The planned size of 1000 patients (the expected Finnish yearly patient population) is considered to provide very sufficient precision for the clinical behaviour of mCRC and for assessment of overall resectability rate. Based on historical data, among 20% (200) of the Finnish yearly population are expected to have liver only disease with a resectability rate of 20% (40). With this sample size the width of the 95% confidence interval of the resectability rate will be approximately <math>\pm 5.5\%</math>.</p>                                                                                                                                                                                                                                                                                                                                                                               |
| <b>Analysis plan</b>              | <p>The primary analyses will be based on the intent-to treat population, which will include all eligible patients.</p>                                                                                                                                                                                                                                                                                                                                                                                                                                                                                                                                                                                                                                                                                                                                                                                                                                                                                                                                                                                                                                                                                                                                            |

|                              |                                                                                                                                                                                                                                                                                                                                                                                                                                                                                                                                                                                                                                                                                                                                                                                                                                            |
|------------------------------|--------------------------------------------------------------------------------------------------------------------------------------------------------------------------------------------------------------------------------------------------------------------------------------------------------------------------------------------------------------------------------------------------------------------------------------------------------------------------------------------------------------------------------------------------------------------------------------------------------------------------------------------------------------------------------------------------------------------------------------------------------------------------------------------------------------------------------------------|
|                              | <p>A 95% confidence interval will be calculated for the overall resectability rate. Comparisons between chemotherapy regimens will be done using a chi-square test as well as with a logistic regression model will be used, if feasible. Resection outcome and postoperative morbidity will be presented at least by descriptive statistics.</p> <p>Survival outcomes, i.e. FFS, PFS, and OS will be estimated for the overall population and for all chemotherapy regimens using the Kaplan-Meier approach. In addition, these parameters will be analyzed using the Cox-proportional hazard model.</p> <p>The RR will be analyzed using chi-square test.</p> <p>Radiological assessments with tumour density and morphology will be analyzed using analysis of covariance ANCOVA, with the RECIST response criteria as a covariate.</p> |
| <b>Duration of the study</b> | <p>It is expected that the first patient is enrolled in 2011 and the enrolment will be completed during 2018. Patients will be followed-up for 10 years after inclusion, until 2025.</p>                                                                                                                                                                                                                                                                                                                                                                                                                                                                                                                                                                                                                                                   |

## STUDY RELATED ASSESSMENTS

| Schedule                                                            | Screening / Baseline | Treatment <sup>(1)</sup><br>Every 8-12 weeks | Post-treatment follow up |
|---------------------------------------------------------------------|----------------------|----------------------------------------------|--------------------------|
| Eligibility assessment                                              | X                    |                                              |                          |
| Informed consent                                                    | X                    |                                              |                          |
| Demographic data                                                    | X <sup>(1)</sup>     |                                              |                          |
| Medical & cancer treatment history. Concomitant medications.        | X <sup>(1)</sup>     | X <sup>(1)</sup>                             | X <sup>(1)</sup>         |
| Tumour assessment (preferably whole body CT )                       | X                    | X <sup>(2)(3)</sup>                          | X <sup>(4)</sup>         |
| Central assessment of resectability                                 | X                    | X <sup>(3)</sup>                             |                          |
| ECOG performance status                                             | X <sup>(1)</sup>     | X <sup>(1)</sup>                             | X <sup>(1)</sup>         |
| Physical examination                                                | X <sup>(1)</sup>     | X <sup>(1)</sup>                             | X <sup>(1)</sup>         |
| Research blood samples <sup>(5)</sup>                               | X                    | X                                            | X                        |
| Follow up on disease progression, anticancer therapies and survival |                      |                                              | X                        |

<sup>(1)</sup> According to local standard practice

<sup>(2)</sup> Response verification recommended after 4-9 weeks

<sup>(3)</sup> Central assessment of resectability will be performed every 8-12 weeks for a maximum of three times

<sup>(4)</sup> If no progressive disease seen when coming off study

<sup>(5)</sup> Whole blood (10 ml EDTA-tube) for DNA at the baseline. Plasma and serum, in 30+20ml EDTA/heparin/citrate-tube and 20ml serum/gel/vacutainer-tube), will be collected at the baseline and thereafter every 8-12 weeks (at the same time as tumour assessment) and after last chemotherapy cycle

## TABLE OF CONTENT

|                                                                                    |           |
|------------------------------------------------------------------------------------|-----------|
| <b>1. BACKGROUND</b>                                                               | <b>31</b> |
| <b>1.1. Disease Background</b>                                                     | <b>31</b> |
| <b>1.2. Chemotherapeutic agents for Colorectal Cancer</b>                          | <b>31</b> |
| 1.2.1. Combination chemotherapy                                                    | 31        |
| <b>1.3. Biological therapies 1<sup>st</sup> line Colorectal Cancer</b>             | <b>32</b> |
| <b>1.4. Resection of Liver Metastasis</b>                                          | <b>32</b> |
| <b>1.5. Resection of lung metastases</b>                                           | <b>32</b> |
| <b>1.6. Assessment of resectability of liver and lung metastases</b>               | <b>33</b> |
| <b>1.7. Radiology assessment</b>                                                   | <b>33</b> |
| <b>1.8. Rationale for health-related quality of life and biomarker assessments</b> | <b>34</b> |
| <b>2. STUDY OBJECTIVES</b>                                                         | <b>34</b> |
| <b>2.1. Primary objectives</b>                                                     | <b>34</b> |
| <b>2.2. Secondary objectives</b>                                                   | <b>34</b> |
| <b>3. STUDY DURATION</b>                                                           | <b>35</b> |
| <b>4. SELECTION CRITERIA</b>                                                       | <b>35</b> |
| <b>4.1. Inclusion Criteria</b>                                                     | <b>35</b> |
| <b>5. STUDY DESIGN</b>                                                             | <b>35</b> |
| <b>5.1. Design</b>                                                                 | <b>35</b> |
| <b>5.2. Study procedures per visit</b>                                             | <b>35</b> |
| 5.2.1. Screening and Baseline                                                      | 35        |
| 5.2.2. Treatment Phase                                                             | 36        |
| 5.2.3. Post-Treatment Follow Up                                                    | 36        |
| 5.2.4. Biological samples                                                          | 36        |
| 5.2.5. Termination of Study                                                        | 37        |
| <b>6. STUDY MEDICATION</b>                                                         | <b>37</b> |
| <b>6.1. Standard medical treatment for mcrc</b>                                    | <b>37</b> |
| 6.1.1. Standard medical treatment in connection with surgery                       | 37        |
| <b>6.2. Treatment Duration</b>                                                     | <b>37</b> |
| <b>6.3. Concomitant Treatment &amp; Therapy</b>                                    | <b>37</b> |
| 6.3.1. Other Medication                                                            | 37        |

|        |                                                   |           |
|--------|---------------------------------------------------|-----------|
| 6.3.2. | Radiation therapy                                 | 37        |
| 7.     | PREMATURE WITHDRAWAL                              | 37        |
| 7.1.   | <b>Withdrawal From Standard Medical Treatment</b> | <b>37</b> |
| 8.     | WARNINGS AND PRECAUTIONS OF MEDICAL TREATMENT     | 38        |
| 9.     | SAFETY PARAMETERS                                 | 38        |
| 10.    | SERIOUS ADVERSE EVENT REPORTING                   | 38        |
| 11.    | STATISTICAL CONSIDERATIONS                        | 38        |
| 11.1.  | <b>Sample size calculation</b>                    | <b>38</b> |
| 11.2.  | <b>Analysis Population</b>                        | <b>39</b> |
| 11.3.  | <b>Analysis Plan</b>                              | <b>39</b> |
| 12.    | GLOSSARY AND DEFINITION OF TERMS USED             | 41        |
| 13.    | REFERENCES                                        | 42        |

## **BACKGROUND**

### **1.1. DISEASE BACKGROUND**

Colorectal cancer is one of the most frequent malignancies, second to breast cancer in women and third to prostate and lung cancer in men [1,2]. The prognosis for the individual patient is dependent upon the extent of the disease. The 5-year survival rate is over 60% in individuals with resectable cancer, but less than 5% in individuals with distant metastatic disease [2-5].

The clinical course of mCRC is of special interest. Sites of metastases primarily is of crucial value whether they are or going to be operable (typically lung or liver metastases) or not (eg. bone metastases). Ten per cent of patients with metastases confined to the liver are considered initially resectable and another 10-15% may be rendered resectable with efficient treatment, but the corresponding figures for lung metastasectomies are unknown. To the best of our knowledge this has not been assessed population based with central resectability evaluation. Co-morbidities and patient/caregiver preference in choice of active treatment and best supportive care has not been thoroughly evaluated in population based manner in mCRC.

### **1.2. CHEMOTHERAPEUTIC AGENTS FOR COLORECTAL CANCER**

Most metastatic colorectal cancer patients are treated with chemotherapy with palliative intent. In locally advanced and distant metastatic disease 5-fluorouracil (5-FU) based chemotherapy improves quality of life and survival compared with best supportive care alone [2,3,6]. Intravenous 5-FU is most efficient when combined with folinic acid (leucovorin, LV) and may be dosed as repeated bolus injections or short/long infusions [7]. Capecitabine (Xeloda™) is an oral fluoropyrimidine carbamate rationally designed to generate 5-FU preferentially in tumour tissue through exploitation of high intratumoural concentrations of thymidine phosphorylase [8].

Oxaliplatin is a platinum derivative in which the platinum atom is complexed with a 1,2 diaminocyclohexane (DACH) and with an oxalate ligand as a leaving group [9]. Oxaliplatin has been widely studied and is active as monotherapy in front-line or subsequent therapy settings in patients with mCRC [10-13].

Irinotecan is a semi-synthetic derivative of camptothecin and belong to the class of topoisomerase I inhibitors. The efficacy of irinotecan given as a single agent has been assessed in first and second line settings [14, 15].

#### **1.2.1. COMBINATION CHEMOTHERAPY**

Phase III trial results showed in 2000 the superiority of irinotecan or oxaliplatin as first-line treatment in combination with 5-FU/LV, compared to 5-FU/LV therapy alone [16-18]. Thus combination chemotherapy became the standard of care and new combination chemotherapy regimens have been explored.

Irinotecan in combination with both bolus and infusional 5-FU/LV has been shown to improve efficacy compared with 5-FU/LV alone in MCRC [8-9]. Also the combination of capecitabine plus irinotecan every 3 weeks (XELIRI regimen) has shown feasible safety and comparable efficacy [19, 20].

Oxaliplatin in combination with bolus and infusional 5-FU/LV has shown improved response rates and progression free as well as overall survival [10]. Oxaliplatin combinations has thus subsequently been evaluated also in combination with chronomodulated 5-FU and oral prodrugs. Capecitabine combinations (XELOX) has shown comparable efficacy and tolerability as infusional 5-FU based chemotherapy [19-22].

The triple combination of irinotecan, oxaliplatin and 5-fluorouracil has been evaluated in 2 randomized studies. In the Falcone study, the triple combination had superior efficacy compared with the FOLFIRI arm. Interestingly a high resection rate was seen in the Falcone study; R0 secondary resection rate was 15 vs. 6% in total population and 36 vs. 12% in the liver only metastases population [23]. In the Souglakos study, no significant benefit for the triple combination was seen [24]. This triple combination has though been considered too toxic in routine clinical care and leaves few options for further lines of chemotherapy. Modern combinations with targeted treatments (i.e. biologics) such as bevacizumab, cetuximab and panitumumab maybe too toxic in conjunction with triple chemotherapy.

### **1.3. BIOLOGICAL THERAPIES 1<sup>ST</sup> LINE COLORECTAL CANCER**

Bevacizumab (Avastin™) is a humanised monoclonal antibody targeting vascular endothelial growth factor (VEGF). VEGF-A which is a ligand with a central role in signalling pathways controlling tumour blood vessel development and survival [25-28]. Several large trials have demonstrated that bevacizumab improves the efficacy of fluoropyrimidine-based chemotherapy in previously untreated patients with metastatic CRC [29-30,22] improving significantly overall survival, progression-free survival, response rate, and response duration. In addition, safety and efficacy of first-line bevacizumab combined with various chemotherapies in patients with metastatic CRC have been demonstrated in phase IV studies [31-33].

Cetuximab (Erbix™) and panitumumab (Vectibix™) are monoclonal antibodies against the epidermal growth factor receptor (EGFR) [34-35]. The efficacy of monoclonal antibodies against EGFR is limited to KRAS wild type tumours [36-37]. Both drugs first showed efficacy in later lines of therapy both as monotherapy [38-39] and in combination with irinotecan [40]. Recently also in first and second line settings [41-42].

Cetuximab has shown superior efficacy and resectability in first line in combination with irinotecan and 5-FU/LV (FOLFIRI) [43]. Oxaliplatin and 5-FU based combinations to cetuximab have shown conflicting results and need further evaluation [44]. The biological doublet with Cetuximab and Bevacizumab showed inferiority [45].

Panitumumab as first line therapy has shown superior efficacy and resectability in combination with oxaliplatin and 5-FU/LV (FOLFOX) [46]. The biology doublet of panitumumab and bevacizumab in first line showed inferiority especially in combination with FOLFOX and no benefit in patients with FOLFIRI [47].

### **1.4. RESECTION OF LIVER METASTASIS**

The liver is the most common site of haematogenous metastasis from gastrointestinal malignancies due to portal venous blood flow from the intestine.

In the past patients with liver metastasis were often deemed inoperable. As a result of improved techniques, major hepatic resection is nowadays performed with acceptable morbidity and low perioperative mortality, under 5% in major hepatobiliary centres [48]. For patients with mCRC liver resection is the only available treatment with an option of long-term survival and also prolonged disease-free survival. Several reports have established the efficacy of surgical resection in selected patients with 5-year survival rates ranging from 37 to 71% [49-52].

However curative operation can be performed only in a small minority of all patients with colorectal metastases confined to the liver and no survival benefit is obtained from incomplete resection [54]. Today the amount of patients with curative intent surgery can be increased after down staging initially unresectable lesions by chemotherapy [53].

Neoadjuvant chemotherapy for two to six months with regular re-evaluation for resectability has been advocated as the optimal strategy to maximize respectability [48,54]. Long oxaliplatin exposure has been linked with blue liver causing increased bleeding in liver resections [55] and long irinotecan based chemotherapy causes steatohepatosis, which may increase morbidity in conjunction with liver resections [56]. Recently published data suggest that bevacizumab may be preventing liver injury from chemotherapy in conjunction with neoadjuvant chemotherapy [57]. Thus routine re-evaluation for liver resectability is done for a maximum of three times during first line chemotherapy.

There is currently one report of a randomized controlled trial evaluating liver resection alone with neoadjuvant and adjuvant therapy combined with liver resection, showing an advantage to the outcome of hepatic resection [53]. Some recent reports and reviews propose an advantage using adjuvant chemotherapy after liver resection [48,54,58,59]. With the development of better chemotherapeutic agents, which may eradicate residual microscopic tumour cell deposits in the liver and elsewhere, partial hepatectomy to remove focal macroscopically observed metastases is likely to be more common and more effective.

### **1.5. RESECTION OF LUNG METASTASES**

Lung is the second most common site of metastases of CRC. CRC is recognized to be the most common primary histology for patients with potentially resectable pulmonary metastases. However the incidence of isolated lung metastases without associated metastases for CRC patients is low (<10%).



No randomized controlled trials exist to date to analyze the outcomes of patients who underwent resection of pulmonary metastases secondary to colorectal cancer. However, several centres have published results from case series, showing 5-year survival of 29-56% and a median survival from 47-74 months [60-63].

Several clinical patient series describe criteria for pulmonary metastasectomy. However, no prospective randomized trials for pulmonary metastasectomy makes it difficult to summarize and evaluate the effectiveness of this operation

There has been data reported that indicates that patients with history of previous liver metastases have a higher risk of tumour recurrence and a decreased survival in comparison with patients who underwent surgery for lung-only CRC metastases [64]. On the other hand, there are also reports concluding that resectable or resected liver metastases might not impact the survival after pulmonary metastasectomy [65].

Different reviews of studies analyzing prognostic factors differ. Thus, there are reviews reporting that number and location of metastases, disease-free interval between resection primary colorectal cancer and detection of pulmonary metastases, pre-resection CEA level, thoracic lymph-node metastasis, level of prethoracotomy serum-carcinoembryonic antigen, age, gender, site and stage are prognostic factors for improved survival rates [65-66].

Still most reviews of studies analyzing prognostic factors such as number of nodules, size of the dominant nodule, disease-free interval, or use of chemotherapy to mention just a few, found no prognostic significance [66-67].

Surgical resection is the primary treatment modality for pulmonary metastases in colorectal cancers in patients who meet the criteria for potentially curative operation. United Kingdom National Institute for Clinical Excellence guidance makes a similar recommendation. The National Comprehensive Cancer Network Clinical Practice Guidelines in Oncology precondition for potentially curative operation as follows:

- the metastases seem to be technically resectable,
- the general and functional risks are tolerable,
- the primary tumour is controlled, and
- no extrathoracic lesions are detected (with the exception of hepatic lesions in which it is possible to completely remove both hepatic and pulmonary metastases).

The role of chemotherapy in the treatment of patients with metastatic colorectal cancer is evolving. Although in most studies chemotherapy has been a standard therapy for metastatic colorectal cancer, the impact of neoadjuvant and adjuvant chemotherapy in the context with pulmonary metastasectomy on long-term survival had not been sufficiently addressed [66].

The integration of systemic targeted therapy should be considered in decision making regarding candidacy and timing for surgery.

#### **1.6. ASSESSMENT OF RESECTABILITY OF LIVER AND LUNG METASTASES**

Patients will be centrally assessed for resectability at baseline and after 8-12 weeks during chemotherapy maximally three times. Treatment with bevacizumab should be stopped at least 4 to 6 weeks before surgical intervention in patients who are to be referred for resection. During this time the patient may receive one or more chemotherapy doses, as clinically appropriate. Chemotherapy and biologicals may be restarted 4 weeks after surgery and bevacizumab when wound healing is complete

#### **1.7. RADIOLOGY ASSESSMENT**

Radiological assessment with whole-body CT two-monthly has been standard. WHO criteria for response were defined in 1982 and replaced by RECIST criteria in 2000. These RECIST criteria have been revised recently [68] but still leaves open the question of how to evaluate the efficacy of chemotherapy, especially in combination with biologicals, radiologically. In GIST for example metabolic activity assessed with PET was found much more reliable [69-74]. So far PET has not shown significant advantage over whole-body CT in response evaluation [75] and the role of PET needs to be established.

MRI of liver is another question not fully answered. Over the past decade liver MRI has been recommended when liver resection has been evaluated but the development of the CT technology has made the role of

MRI debatable. Recently reports of altered density and morphology of for example liver metastases after chemotherapy and biologicals has been seen on radiology [76].

This study aims to explore improved radiological evaluation methods in mCRC compared with RECIST CTs.

### **1.8. RATIONALE FOR HEALTH-RELATED QUALITY OF LIFE AND BIOMARKER ASSESSMENTS**

The study will be performed in order to analyse the clinical behaviour and treatments for mCRC population based. Central assessment of resectability will also provide a more reliable estimate of the resectability rate in Finnish metastatic CRC patients. The rationale for this study is to evaluate which treatment modalities result in higher resectability rates as well as a longer progression free survival and overall survival. Improved radiologic assessment methods and prognostic factors will also be evaluated.

**Health related quality of life (HR QoL) issues** and cost-utility, cost-benefit and quality adjusted life year gain (QALY) is becoming increasingly important with prolonged survival in this patient population due to improving treatment alternatives. Therefore QoL questionnaires EORTC QLQ-C30 and CR29- EQ5 and 15D will be administered to new patients to be included in the prospective clinical study- estimated 150-200 patients- which is a fair subgroup for these analysis.

Biomarkers and personalized medicine is becoming increasingly important in treatment of metastatic colorectal cancer. Prognostic markers as BRAF and predictive markers as KRAS and NRAS are used in clinical practise but several other markers are to be validated.

The inclusion criteria for the RAXO study are patients with first line treatment and therefore a significant proportion of metastatic patients with aggressive disease, old age and comorbidities are not consented and thus participate in the data collection trial. Many discrepancies for example in BRAF mutation frequency have been noted among clinical study patients with a frequency of 4 to 8% and over 20% in more population-based series (as the data collection trial) (Sörbye et al, 2015, Annika Ålgars personal communication 7.9.2016). Systemic consenting of patients to the prospective clinical study was not performed in the early days of the inclusion period due to logistic reasons.

The prospective trial will consist of slightly selective patients and therefore the diagnostic samples of the data collection trial identified via the cancer registry, the hospital and National institute of health and welfare (THL) registries are used to verify diagnosis and predictive and prognostic markers population based.

Samples up til 1<sup>st</sup> September 2013 have been transferred or are due to be transferred to the Biobanks, they are used with permission by the Biobanks. Samples from 1<sup>st</sup> September 2013 are under the biobank laws of Finland but very few patients have been given the opportunity to consent especially during the first years. Therefore they cannot be used under this permission and due to the nature of metastatic disease the majority of patients cannot be consented as of now. The majority of cases before the biobank era are also deceased and cannot consent. Cases that have declined participation into the RAXO-study will not be used in the biomarker population.

The diagnostic samples, mainly tumour tissue from data collection trial, are clinically relevant when they provide population-based information about the nature of the disease and treatment options with valuable prognostic and predictive markers benefitting metastatic colorectal patients in the future. Permission for use of these diagnostic samples are requested from VALVIRA and the ethical board.

## **STUDY OBJECTIVES**

### **1.9. PRIMARY OBJECTIVES**

- To assess clinical behaviour of metastatic colorectal cancer and overall resectability, postoperative morbidity and outcomes after resection

### **1.10. SECONDARY OBJECTIVES**

- To assess treatments for mCRC

- To assess efficacy of chemotherapy and targeted drugs with overall response rates (ORR), failure free survival (FFS), progression free survival (PFS) and overall survival (OS)
- To radiologically assess tumour density and morphology, and assess alternative radiologic response evaluation in comparison with RECIST response criteria
- To evaluate whole blood, plasma, serum and tumour block biomarkers and DNA polymorphisms that may predict drug effects, resectability and clinical behaviour of the tumour
- Biomarker evaluation from diagnostic samples, mainly tumour blocks, in the data collection trial in order to verify diagnosis and predictive & prognostic markers (from prospective clinical cohort) in a big population based series.
- Quality of life and health related quality of life, Cost-utility, QALY and cost-benefit assessment in the subpopulation of 100-200 patients.

## STUDY DURATION

It is expected that the first patient is enrolled in 2011 and the enrolment will be completed during 2018. Patients will be followed-up for 10 years after inclusion, until 2025.

## SELECTION CRITERIA

### 1.11. INCLUSION CRITERIA

1. Patients with histologically confirmed CRC, who are scheduled to start or are getting first line chemotherapy for metastatic disease
2. Age  $\geq$  18
3. Metastatic disease (including locally advanced disease not amenable with surgery and/or (chemo)radiotherapy)
4. Signed written informed consent according to ICH/GCP and the local regulations (approved by the Independent Ethics Committee) will be obtained prior to study
5. No informed consent will be obtained from patients participating in the data collection study obtaining data from hospital charts without blood sampling and contacting of patients

## STUDY DESIGN

### 1.12. DESIGN

1) Prospective clinical trial and 2) data collection trial.

### 1.13. STUDY PROCEDURES PER VISIT

Please refer to the Assessment flow chart (Table 1) for an overview.

#### 1.13.1. SCREENING AND BASELINE

Signed informed consent has to be obtained from all patients prior to blood sampling and central assessment of resectability. The investigator will register the consenting patient at the co-ordinating centre. The following data will be collected and recorded:

Baseline/screening includes following assessments:

- According to local standard practice:
  - Demographic data, medical history, cancer/treatment history and concomitant medications
  - ECOG performance status and physical examination

- Tumour assessments i.e. whole body CT (in combination with MRI and PET according to subprotocols or local standards) before treatment starts
- Central assessment of resectability initiated
- Whole blood for DNA, plasma and serum at the baseline
- Tumour blocks collected

### **1.13.2.TREATMENT PHASE**

Patients will receive the local standard of care treatment and according to standard practice they will have scheduled visits in conjunction with treatment infusions.

The following data will be collected during treatment:

- According to local standard practice:
  - Spontaneous adverse event reporting according to local regulations, without data collection for the study purposes
  - Monitoring of concomitant diseases, treatments, medications and compliance to drugs
  - Physical examination
  - Assessments of tumour response using whole-body CT (or MRI/PET according to subprotocols)
  - Confirmation of overall response
- Resectability will be assessed centrally after baseline for a maximum of 3 times every 8-12 weeks during the treatment
- Plasma and serum will be collected at the same time as tumour assessment and after the last chemotherapy cycle

### **1.13.3.POST-TREATMENT FOLLOW UP**

First line cancer treatment will be terminated when disease progression is identified or if toxicity is experienced that in the view of the patient or doctor is unacceptable.

The following data will be collected during follow-up:

- According to local standard practice:
  - Assessments of tumour response
  - Subsequent treatments
  - Spontaneous adverse event reporting, without data collection for the study purposes

### **1.13.4.BIOLOGICAL SAMPLES**

Blood samples for biomarker analyses will be collected from those patients who give the consent for the biomarker study. Blood samples will be collected at the baseline, at efficacy assessments during the treatment phase and at the final visit.

Sample collection will include whole blood (10 ml EDTA-tube) for DNA at the baseline. Plasma and serum, 18ml and 12 ml each, (in 30ml EDTA/heparin/citrate-tube and 20ml serum/gel/vacutainer-tube), will be collected at the baseline and thereafter every 8-12 weeks (at the same time as tumour assessment) and after last chemotherapy cycle

Serum and plasma samples are collected for protein analyses (blood collected into an tube as defined in Table 1) and blood samples for DNA extraction in order to measure DNA polymorphism. The set of plasma biomarkers will be analyzed including but not limited to: biomarkers that predict the clinical behaviour of the tumour, angiogenesis, resectability and regeneration biomarkers.

#### Baseline sample:

- both plasma and serum samples and blood samples for DNA extraction will be collected as defined in Table 1.

#### Every 8-12 weeks during the treatment phase in conjunction with efficacy assessment:

- serum and plasma samples for protein analyses will be collected as defined in Table 1.

#### The last visit:

- serum and plasma samples for protein analyses will be collected as defined in Table 1.

### **1.13.5. TERMINATION OF STUDY**

The survival status of each patient and subsequent treatments should be assessed at the end of 1<sup>st</sup> line chemotherapy, at three months intervals according to the standard visit schedule, and at the end of follow-up i.e. death of the patient, withdrawal of consent or termination of the study.

## **STUDY MEDICATION**

### **1.14. STANDARD MEDICAL TREATMENT FOR MCRC**

The clinic's standard medical treatment will be administered until disease progression, unless unacceptable toxicity is experienced or until resectability is achieved. Stop and go strategy is used according to local standard. Progression on first line treatment is defined as when resistance to reintroduced drugs is verified.

#### **1.14.1. STANDARD MEDICAL TREATMENT IN CONNECTION WITH SURGERY**

Patients who are to be referred for liver or lung resection will receive scheduled treatment up to 3 weeks before surgery. No bevacizumab should be given within 4-8 weeks before (thus bevacizumab is often omitted from the last cycle) and 4 weeks after surgery. Following metastasectomy at least 3 months of the same chemotherapy treatment should be given at the physicians discretion.

### **1.15. TREATMENT DURATION**

Standard medical cancer treatment will be administered until disease progression is identified or if toxicity is experienced that in the view of the patient or doctor is unacceptable.

### **1.16. CONCOMITANT TREATMENT & THERAPY**

#### **1.16.1. OTHER MEDICATION**

Any concomitant therapy is at the clinician's discretion and should be recorded.

#### **1.16.2. RADIATION THERAPY**

Should the patient need to undergo radiation therapy the procedure will be recorded.

## **PREMATURE WITHDRAWAL**

### **1.17. WITHDRAWAL FROM STANDARD MEDICAL TREATMENT**

All patients are allowed to withdraw from the study at any time and for whatever reason without affecting their right to an appropriate follow-up treatment.

## WARNINGS AND PRECAUTIONS OF MEDICAL TREATMENT

For warnings and precautions concerning any of the standard medical treatments for colorectal cancer the reference document is the Summary of Product Characteristics.

## SAFETY PARAMETERS

Safety variables according to local clinical practice will be monitored according to local standards but will not be collected for study purposes:

- Adverse events (inclusive serious adverse events)
- Vital signs
- Laboratory tests

## SERIOUS ADVERSE EVENT REPORTING

The SAE reporting and annual safety reporting is the responsibility of the sponsor (=investigators) and are done according to the local legislation.

Progression of underlying malignancy is not reported as an adverse event if it is clearly consistent with the suspected progression of the underlying cancer as defined by RECIST criteria.

### 1) SUSARs

The sponsor submits SUSARs to Health authority (FIMEA).

### 2) SAEs

Any protocol defined Serious Adverse Events and pregnancy reports that occur during the course of the study or within 4 weeks following treatment discontinuation or completion will be collected by the sponsor periodically.

Excluded from the requirement of expedited reporting are all expected events· although serious (Grade 3 or 4)· that are more common as 1% according to SPCs (summary of product characteristics) adverse event chapter. SAEs excluded from the requirement of expedited reporting are collected to AE-pages in case report forms and summarized at the end of the study.

### 3) AEs

AEs are collected to AE-pages in case report forms and information of these non-serious adverse events is summarized at the end of study.

The definition and reporting requirements of ICH Guideline for Clinical Safety Data Management, Definitions and Standards for Expedited Reporting, Topic E2 and local legislation will be adhered to. Complete information can be found in [www.ich.org](http://www.ich.org) and [www.nam.fi](http://www.nam.fi).

~~The treating physician is responsible for safety reporting to the local health authority (Fimea) according to local regulations and spontaneous reporting requirements [http://www.fimea.fi/lait\\_ja\\_ohjeet/ohjeet](http://www.fimea.fi/lait_ja_ohjeet/ohjeet). Adverse events are not recorded and collected for study purposes.~~

~~Progression of underlying malignancy is not reported as an adverse event if it is clearly consistent with the suspected progression of the underlying cancer as defined by RECIST criteria.~~

## STATISTICAL CONSIDERATIONS

### 1.18. SAMPLE SIZE CALCULATION

The planned size of 1000 patients (the expected Finnish yearly patient population) is considered to provide very sufficient precision for the clinical behaviour of mCRC and for assessment of overall resectability rate. Based on historical data, among 20% (200) of the Finnish yearly population are expected to have liver only disease with a resectability rate of 20% (40). With this sample size the width of the 95% confidence interval of the resectability rate will be approximately  $\pm 5.5\%$ .

### **1.19. ANALYSIS POPULATION**

The primary analysis of resectability rate will be based on all eligible patients who had at least one central resectability evaluation performed. The Intention-to-treat (ITT) approach, i.e. all eligible patients, will be applied on other analyses in this population based study.

### **1.20. ANALYSIS PLAN**

This is a summary of the planned statistical analyses. The statistical analysis will be described more in detail in a separate statistical analysis plan.

The primary objectives are the clinical behaviour of mCRC and the overall resectability rate, postoperative morbidity and outcomes after resection. Different chemotherapy regimens will also be compared with respect to these parameters. A 95% confidence interval will be calculated for these parameters.

Comparisons between clinical factors and chemotherapy regimens will be done using a chi-square test as well as a logistic regression model. As the expected number of resections is quite low, resection outcome and postoperative morbidity will be summarized mainly by descriptive statistics. However, a 95% confidence intervals will be calculated for overall resection outcome and postoperative morbidity rates.

Survival outcomes, i.e. failure free survival, progression free survival (PFS), and overall survival will be estimated for the overall population and for all chemotherapy regimens using the Kaplan-Meier approach. In addition, the Cox-proportional hazard model will be used for comparison of chemotherapy regimens in the analysis of these parameters.

The response rate will be summarized overall and the differences between chemotherapy regimens will be analyzed using chi-square test.

Tumour density and morphology will be summarized and analyzed using analysis of covariance ANCOVA, with the RECIST response criteria as a covariate.

The demographic and baseline characteristics will be summarized with descriptive statistics.

**SIGNATURE**

I agree to perform the clinical study according to the protocol, international good clinical practice principles and regulatory authority requirements.

**PRINCIPAL INVESTIGATORS:**

DATE & PLACE

SIGNATURE

\_\_\_\_\_  
\_\_\_\_\_

\_\_\_\_\_  
Professor Helena Isoniemi  
Helsinki University Central Hospital, Dept. of Surgery

DATE & PLACE

SIGNATURE

\_\_\_\_\_  
\_\_\_\_\_

\_\_\_\_\_  
Associate professor Pia Österlund  
Helsinki University Central Hospital, Dept. of Oncology  
Tampere University Central Hospital, Dept. of Oncology



## GLOSSARY AND DEFINITION OF TERMS USED

|         |                                                             |
|---------|-------------------------------------------------------------|
| AE      | Adverse event                                               |
| ALAT    | Alanine amino transferase                                   |
| ASAT    | Aspartate amino transferase                                 |
| CA19-9  | Cancer antigen 19-9                                         |
| CEA     | Carcinoembryonic antigen                                    |
| CNS     | Central nervous system                                      |
| CPT-11  | Irinotecan                                                  |
| CRP     | C-reactive protein                                          |
| CT      | Computer tomography                                         |
| CTCAE   | Common terminology criteria for adverse events              |
| DACH    | 1,2-diaminocyclohexane                                      |
| DPD     | Dihydropyrimidine dehydrogenase                             |
| EGFR    | Epidermal growth factor receptor                            |
| FOLFOX  | Infusional 5-FU, leucovorin and oxaliplatin (biweekly)      |
| FOLFIRI | Infusional 5-FU, leucovorin and irinotecan (biweekly)       |
| 5-FU    | 5-fluorouracil                                              |
| GCP     | Good Clinical Practice                                      |
| Gr      | Grade                                                       |
| HUCH    | Helsinki University Central Hospital                        |
| ICH     | International Committee on Harmonisation                    |
| IEC     | Independent Ethics Committee                                |
| LV      | Leucovorin (folinic acid)                                   |
| MRI     | Magnetic resonance imaging                                  |
| NCI     | National Cancer Institute (of the United States of America) |
| NSAIDs  | Non-steroidal anti-inflammatory drugs                       |
| OS      | Overall survival                                            |
| PFS     | Progression free survival                                   |
| RECIST  | Response evaluation criteria in solid tumors                |
| SAE     | Serious adverse event                                       |
| SUSAR   | Suspected unexpected serious adverse reaction               |
| TTP     | Time to tumor progression or death                          |
| ULN     | Upper limit of normal                                       |
| VEGF    | Vascular endothelial growth factor                          |
| WHO PS  | WHO or Zubrod performance status                            |
| XELOX   | Capecitabine, oxaliplatin                                   |

## REFERENCES

1. SEER Cancer Statistics Review 1973-1999. [http://seer.cancer.gov/csr/1973\\_1999/colorect.pdf](http://seer.cancer.gov/csr/1973_1999/colorect.pdf)
2. Verschraegen CF, Pazdur R. Medical management of colorectal carcinomas. *Tumori* 1994; 80(1): 1-11.
3. Kemeny N. Current approaches to metastatic colorectal cancer. *Semin Oncol* 1994; 21(4 suppl 7): 67-75.
4. Wolmark N, Rockette H, Mamounas E, et al. Clinical trial to assess the relative efficacy of fluorouracil and leucovorin, fluorouracil and levamisole, and fluorouracil, leucovorin and levamisole in patients with Dukes' B and C carcinoma of the colon: results from National Surgical Adjuvant Breast and Bowel Project C-04. *J Clin Oncol* 1999; 17(11): 3553-3559.
5. Porschen R, Bermann A, Loffler T, et al. Fluorouracil plus leucovorin as effective adjuvant chemotherapy in curatively resected stage III colon cancer: results of the trial adjCCA-01. *J Clin Oncol* 2001, 19(6): 1787-1794.
6. Graf W, Pahlman L, Bergstrom R, Glimelius B. The relationship between an objective response to chemotherapy and survival in advanced colorectal cancer. *Br J Cancer* 1994; 70(3): 559-563.
7. Lokich JJ, Ahlgren JD, Gullo JJ, et al. A prospective randomized comparison of continuous infusion fluorouracil with a conventional bolus schedule in metastatic colorectal carcinoma: a Mid-Atlantic Oncology Program Study. *J Clin Oncol* 1989; 7: 425-432.
8. Miwa M, Ura M, Nishida M, et al. Design of a novel oral fluoropyrimidine carbamate, capecitabine, which generates 5-fluorouracil selectively in tumors by enzymes concentrated in human liver and cancer tissue. *Eur J Cancer* 1998; 34(8):1274-1281.
9. Sanofi-Synthelabo. Eloxatin: Summary of product characteristics.: France; August 2001.
10. Raymond E, Chaney SG, Taama A, et al. Oxaliplatin a review of preclinical and clinical studies. *Ann Oncol* 1998, 9 (10):1053-1071.
11. Machover D, Diaz-Rubio E, et al. Two consecutive phase II studies of Eloxatin (L-OHP) for treatment of patients with advanced colorectal carcinoma who were resistant to previous treatment with fluoropyrimidines. *Ann Oncol* 1996;7: 95-98.
12. Garufi D, Lévi F, Missel JL. Activity of Eloxatin in colonic cancer: a report of 25 demonstrative cases. Debiopharm Internal Report, October 1994.
13. Eloxatin™ SPC (summary of product characteristics).
14. Shimada Y, Rougier P, Pitot H: Efficacy of CPT-11 (irinotecan) as a single agent in metastatic colorectal cancer. *Eur J Cancer* 1996;32A Suppl 3:S13-7.
15. Campto™ SPC (summary of product characteristics)
16. Saltz LB, Cox JV, Blanke C, et al. Irinotecan plus fluorouracil and leucovorin for metastatic colorectal cancer. Irinotecan Study Group. *N Engl J Med* 2000; 343(13): 905-914.
17. Douillard JY, Cunningham D, Roth AD, et al. Irinotecan combined with fluorouracil compared with fluorouracil alone as first-line treatment for metastatic colorectal cancer: a multicentre randomized trial. *Lancet* 2000; 355 (9209): 1041-1047.
18. de Gramont A, Figer A, Seymour M, et al. Leucovorin and fluorouracil with or without oxaliplatin as first-line treatment in advanced colorectal cancer. *J Clin Oncol* 2000; 18: 2938-2947.
19. Diaz-Rubio E, TRJ Evans, J Taberero et al. Capecitabine (Xeloda®) in combination with oxaliplatin: a phase I, dose-escalation study in patients with advanced or metastatic solid tumors. *Ann Oncol* 2002; 13: 558-565.
20. Zeuli M, Di Costanzo F, Sdrobolini A, et al. Capecitabine and oxaliplatin in advanced colorectal cancer: A dose-finding study. *Ann Oncol* 2002; 12: 1737-1741.
21. Cassidy J, Clarke S, Diaz-Rubio E et AL. Randomized phase III study of capecitabine plus oxaliplatin compared with fluorouracil/folinic acid plus oxaliplatin as first-line therapy for metastatic colorectal cancer. *J Clin Oncol* 2008; 26(12): 2006-2012.

22. Saltz Et al: Bevacizumab in combination with oxaliplatin-based chemotherapy as first line therapy in metastatic colorectal cancer: A randomized phase III study. *J Clin Oncol* 2008; 26(12): 2013-2019.
23. Falcone A, Ricci S, Brunetti I, Pfanner E et al.: Phase III Trial of Infusional Fluorouracil, Leucovorin, Oxaliplatin, and Irinotecan (FOLFOXIRI) Compared With Infusional Fluorouracil, Leucovorin, and Irinotecan (FOLFIRI) As First-Line Treatment for Metastatic Colorectal Cancer: The Gruppo Oncologico Nord Ovest. *J Clin Oncol* 2007; 25 (13): 1670-1676
24. Souglakos<sup>1</sup> J, Androulakis N, Syrigos K, Polyzos A et al: FOLFOXIRI (folinic acid, 5-fluorouracil, oxaliplatin and irinotecan) vs. FOLFIRI (folinic acid, 5-fluorouracil and irinotecan) as first-line treatment in metastatic colorectal cancer (MCC): a multicentre randomised phase III trial from the Hellenic Oncology Research Group (HORG). *British Journal of Cancer* 2006; 94: 798–805.
25. Achen MG, Stacker SA. The vascular endothelial growth factor family; proteins which guide the development of the vasculature. *Int J Exp Pathol.* 1998; 79(5):255-265.
26. Ferrara N. VEGF: an update on biological and therapeutic aspects. *Curr Opin Biotechnol* 2000;11:617–624.
27. Ferrara N. Role of vascular endothelial growth factor in regulation of physiological angiogenesis. *Am J Physiol Cell Physiol.* 2001; 280(6):C1358-1366.
28. Shibuya M. Structure and function of VEGF/VEGF-receptor system involved in angiogenesis. *Cell Structure Function* 2001;26:25–35.
29. Hurwitz H, Fehrenbacher L, Novotny et al. Bevacizumab plus irinotecan, fluorouracil, and leucovorin for metastatic colorectal cancer. *N Engl J Med.* 2004; 350(23):2335-42
30. Kabbinavar FF, Schulz J, McCleod M, et al; Addition of Bevacizumab to Bolus Fluorouracil and Leucovorin in First-Line Metastatic Colorectal Cancer: Results of a Randomized Phase II Trial. *J Clin Oncol* 2005; 23:3697-3705.
31. Sobrero et al: Phase IV study of bevacizuman in combination with infusional fluorouracil, leucovorin and irinotecan (FOLFIRI) in first-line metastatic colorectal cancer. *Oncology* 2009; 77:113-119.
32. Van Cutsem et al: Safety and efficacy of first-line bevacizumab with FOLFOX; XELOX, FOLFIRI and fluoropyrimidines in metastatic colorectal cancer: The BEAT study. *Ann of Onc* 20:1842-1847, 2009.
33. Grothey et al: Bevacizumab Beyond First Progression is associated with prolonged overall survival in metastatic colorectal cancer: Results from a large observational cohort study (BRiTE). *J Clin Oncol* 2009; 26(33) :5326-5334.
34. Markman B, Javier Ramos F, Capdevila J, Tabernero J: EGFR and KRAS in colorectal cancer. *Adv Clin Chem.* 2010;51:71-119.
35. Markman B, Capdevila J, Elez E, Tabernero J: New trends in epidermal growth factor receptor-directed monoclonal antibodies. *Immunotherapy.* 2009 Nov;1(6):965-82.
36. De Mattos-Arruda L, Dienstmann R, Tabernero: Development of Molecular Biomarkers in Individualized Treatment of Colorectal Cancer. *J.Clin Colorectal Cancer.* 2011 May 12.
37. Lin AY, Buckley NS, Lu AT, Kouzminova NB, Salpeter SR: Effect of KRAS mutational status in advanced colorectal cancer on the outcomes of anti-epidermal growth factor receptor monoclonal antibody therapy: a systematic review and meta-analysis. *Clin Colorectal Cancer.* 2011 Mar 1;10(1):63-9.
38. Van Cutsem E, Peeters M, Siena S, Humblet Y, Hendlisz A, Neyns B, Canon JL, Van Laethem JL, Maurel J, Richardson G, Wolf M, Amado RG: Open-label phase III trial of panitumumab plus best supportive care compared with best supportive care alone in patients with chemotherapy-refractory metastatic colorectal cancer. *J Clin Oncol.* 2007 May 1;25(13):1658-64.
39. Jonker DJ, O'Callaghan CJ, Karapetis CS, Zalcborg JR et al: Cetuximab for the treatment of colorectal cancer. *N Engl J Med.* 2007 Nov 15;357(20):2040-8.
40. Cunningham D, Humblet Y, Siena S, Khayat D et al: Cetuximab monotherapy and cetuximab plus irinotecan in irinotecan-refractory metastatic colorectal cancer. *N Engl J Med.* 2004 Jul 22;351(4):337-45.

41. Sobrero AF, Maurel J, Fehrenbacher L et al: EPIC: Phase III Trial of Cetuximab Plus Irinotecan After Fluoropyrimidine and Oxaliplatin Failure in Patients With Metastatic Colorectal Cancer. *J Clin Oncol* 2008; 26:2311-2319
42. Seymour, et al: Addition of panitumumab to irinotecan: Results of PICCOLO, a randomized controlled trial in advanced colorectal cancer (aCRC). ASCO 2011 (abstract 3523)
43. Van Cutsem E, Kohne C-H, Hitre E et al: Cetuximab and Chemotherapy as Initial Treatment for Metastatic Colorectal Cancer. *N Engl J Med* 2009;360:1408-17.
44. Maughan TS, Adams RA, Smith CG, Meade AM et al: Addition of cetuximab to oxaliplatin-based first-line combination chemotherapy for treatment of advanced colorectal cancer: results of the randomised phase 3 MRC COIN trial. *Lancet.* 2011 Jun 18;377(9783):2103-14.
45. Tol J, Koopman M, Cats A, Rodenburg CJ, Creemers GJ et al: Chemotherapy- bevacizumab- and cetuximab in metastatic colorectal cancer. *N Engl J Med.* 2009 Feb 5;360(6):563-72.
46. Douillard JY, Siena S, Cassidy J, Tabernero J: Randomized phase III trial of panitumumab with infusional fluorouracil, leucovorin, and oxaliplatin (FOLFOX4) versus FOLFOX4 alone as first-line treatment in patients with previously untreated metastatic colorectal cancer: the PRIME study. *J Clin Oncol.* 2010 Nov 1;28(31):4697-705.
47. Hecht JR, Mitchell E, Chidiac T, Scroggin C et al: . A randomized phase IIIB trial of chemotherapy, bevacizumab, and panitumumab compared with chemotherapy and bevacizumab alone for metastatic colorectal cancer. *J Clin Oncol.* 2009 Feb 10;27(5):672-80.
48. Benoist et al: The Role of Preoperative Chemotherapy in Patients with Resectable colorectal Liver Metastases. *Ann Surg Oncol* (2009) 16:2385-2390.
49. Morris EJ, Forman D, Thomas JD, Quirke P, Taylor EF, Fairley L, Cottier B, Poston G: Surgical management and outcomes of colorectal cancer liver metastases. *Br J Surg.* 2010 Jul;97(7):1110-8.
50. van der Pool AE, Lalmahomed ZS, de Wilt JH, Eggermont AM, Ijzermans JN, Verhoef C: Trends in treatment for synchronous colorectal liver metastases: differences in outcome before and after 2000. *J Surg Oncol.* 2010 Oct 1;102(5):413-8.
51. House MG, Ito H, Gönen M, Fong Y, Allen PJ, DeMatteo RP, Brennan MF, Blumgart LH, Jarnagin WR, D'Angelica MI: Survival after hepatic resection for metastatic colorectal cancer: trends in outcomes for 1,600 patients during two decades at a single institution. *J Am Coll Surg.* 2010 May;210(5):744-52, 752-5.
52. Aloia TA, Vauthey JN, Loyer EM, Ribero D, Pawlik TM, Wei SH, Curley SA, Zorzi D, Abdalla EK: Solitary colorectal liver metastasis: resection determines outcome. *Arch Surg.* 2006 May;141(5): 460-6; discussion 466-7.
53. Nordlinger et al: Perioperative chemotherapy with FOLFOX4 and surgery versus surgery alone for resectable liver metastases from colorectal cancer (EORTC Intergroup trial 40983): a randomized controlled trial. *The Lancet* 2008; 371:1007-1016. Mitry et al: Adjuvant chemotherapy After Potentially Curative Resection of Metastases From Colorectal Cancer: A Pooled Analysis of two Randomized Trials. *J Clin Oncol* 2008; 26(30): 4906-4911.
54. Chua et al: Systematic Review of Randomized and Nonrandomized Trials of the Clinical response and Outcomes of Neoadjuvant Systemic Chemotherapy for resectable colorectal Liver Metastases. *Ann Surg Oncol* 2010; 17(2): 492-501.
55. Mehta N, Ravikumar R, Coldham C, Buckels J, Hubscher S, Bramhall S, Wigmore S, Mayer A, Mirza D: Effect of preoperative chemotherapy on liver resection for colorectal liver metastases. *Eur J Surg Oncol* 2008, 34(7), 782-786.
56. Vauthey J-N, Pawlik TM, Ribero D, Wu T-T et al.: Chemotherapy Regimen Predicts Steatohepatitis and an Increase in 90-Day Mortality After Surgery for Hepatic Colorectal Metastases. *J Clin Oncol* 2006: 24(13), 2065-2072.
57. Ellis LM, Curley SA, Grothey A: Surgical Resection After Downsizing of Colorectal Liver Metastasis in the Era of Bevacizumab. *J Clin Oncol* 2005; 23(22): 4853-4855.
58. Mahfud, Breitenstein et al: Impact of Preoperative Bevacizumab on Complications After resection of Colorectal Liver Metastases: Case-Matched Control study. *World J Surg* October 2010; 34(1): 92-100.

59. Kemeny N: The management of resectable and unresectable liver metastases from colorectal cancer. *Curr Opin Oncol* 2010 Jul;22(4):364-73.
60. Welter S, Jacobs J, Krbek T, et al.: Long-term survival after repeated resection of pulmonary metastases from colorectal cancer. *Ann Thorac Surg* 2007;84:203–10.
61. Rotolo N, De Monte L, Imperatori A, et al. Pulmonary resections of single metastases from colorectal cancer. *Surg Oncol* 2007;16:5141– 4.
62. Lo C, Chu C, Zhu T, et al. Pulmonary resection for metastases from colorectal cancer. *Surgical Practice* 2007;11:147–53.
63. Gilliams A. Minimally invasive treatment for liver and lung metastases in colorectal cancer. *BMJ* 2007;334:1056-1057.
64. Landes U, Robert J, Perneger T et al. R Predicting survival after pulmonary metastasectomy for colorectal cancer: previous liver metastases matter. *BMC Surgery* 2010, 10:17.
65. Kaifi J, Gusani NJ, Deshaies I et al. Indications and Approach to Surgical Resection of Lung Metastases. *Journal of Surgical Oncology* 2010;102:187–195.
66. Pfannschmidt J, Hoffmann H, Dienemann H. Reported Outcome Factors for Pulmonary Resection in Metastatic Colorectal Cancer. *J Thorac Oncol.* 2010;5: S172–S178.
67. Erhunmwunsee L, D’Amico TA. Surgical Management of Pulmonary Metastases. *Ann Thorac Surg* 2009;88:2052-2060.
68. Eisenhauer et al: New response evaluation criteria in solid tumors: Revised RECIST guideline (version 1.1.) *Eur j Cancer*, 2009; 45:228-247.
69. Choi H.:Response evaluation of gastrointestinal stromal tumors. *Oncologist.* 2008;13 Suppl 2:4-7. Review.
70. Benjamin RS, Choi H, Macapinlac HA, Burgess MA, Patel SR, Chen LL, Podoloff DA, Charnsangavej C.: We should desist using RECIST, at least in GIST. *J Clin Oncol.* 2007 May 1;25(13):1760-4.
71. Choi H, Charnsangavej C, Faria SC, Macapinlac HA, Burgess MA, Patel SR, Chen LL, Podoloff DA, Benjamin RS.: Correlation of computed tomography and positron emission tomography in patients with metastatic gastrointestinal stromal tumor treated at a single institution with imatinib mesylate: proposal of new computed tomography response criteria. *J Clin Oncol.* 2007 May 1;25(13):1753-9.
72. Hong X, Choi H, Loyer EM, Benjamin RS, Trent JC, Charnsangavej C.: Gastrointestinal stromal tumor: role of CT in diagnosis and in response evaluation and surveillance after treatment with imatinib. *Radiographics.* 2006 Mar-Apr;26(2):481-95.
73. Choi H.:Critical issues in response evaluation on computed tomography: lessons from the gastrointestinal stromal tumor model. *Curr Oncol Rep.* 2005 Jul;7(4):307-11.
74. Choi H, Charnsangavej C, de Castro Faria S, Tamm EP, Benjamin RS, Johnson MM, Macapinlac HA, Podoloff DA.:CT evaluation of the response of gastrointestinal stromal tumors after imatinib mesylate treatment: a quantitative analysis correlated with FDG PET results. *AJR Am J Roentgenol.* 2004 Dec;183(6):1619-28.
75. Wahl et al: From RECIST to PERCIST: Evolving considerations for PET response criteria in solid tumor. *J Nucl Med* 50:122S-150S, 2009.
76. Chun et al: Association of Computed Tomography Morphologic Criteria With Pathologic Response and Survival in Patients Treated With Bevacizumab for Colorectal Liver Metastases. *JAMA*, December 2, 2009; 302(21 ): 2338-2344.
